# Supplementary material for: Integrating patient values and preferences in healthcare: a systematic review of qualitative evidence
Source: PubMed Central journal article supplement — BMJ Open. 2022 Nov 17;12(11):e067268. doi: 10.1136/bmjopen-2022-067268 (PMC9677014; doi:10.1136/bmjopen-2022-067268), 2022-11-17
Supplement: bmjopen-2022-067268.draft_revisions.pdf [file bmjopen-2022-067268.draft_revisions.pdf]

# BMJ Open

BMJ Open is committed to open peer review. As part of this commitment we make the peer review history of every article we publish publicly available.

When an article is published we post the peer reviewers' comments and the authors' responses online. We also post the versions of the paper that were used during peer review. These are the versions that the peer review comments apply to.

The versions of the paper that follow are the versions that were submitted during the peer review process. They are not the versions of record or the final published versions. They should not be cited or distributed as the published version of this manuscript.

BMJ Open is an open access journal and the full, final, typeset and author-corrected version of record of the manuscript is available on our site with no access controls, subscription charges or pay-per-view fees (<http://bmjopen.bmj.com>).

If you have any questions on BMJ Open's open peer review process please email [info.bmjopen@bmj.com](mailto:info.bmjopen@bmj.com)

# BMJ Open

## Integrating Patient Values and Preferences in Health Care: A Systematic Review of Qualitative Evidence

|                               |                                                                                                                                                                                                                                       |
|-------------------------------|---------------------------------------------------------------------------------------------------------------------------------------------------------------------------------------------------------------------------------------|
| Journal:                      | <i>BMJ Open</i>                                                                                                                                                                                                                       |
| Manuscript ID                 | bmjopen-2022-067268                                                                                                                                                                                                                   |
| Article Type:                 | Original research                                                                                                                                                                                                                     |
| Date Submitted by the Author: | 20-Aug-2022                                                                                                                                                                                                                           |
| Complete List of Authors:     | Tringale, Michael; University of Oxford, Stephen, GenIa; University of Oxford<br>Boylan, Anne-Marie; Oxford University, Nuffield Department of Primary Care Health Sciences<br>Heneghan, Carl; Oxford University, Primary Health Care |
| Keywords:                     | GENERAL MEDICINE (see Internal Medicine), PRIMARY CARE, Asthma < THORACIC MEDICINE, General diabetes < DIABETES & ENDOCRINOLOGY, Adult oncology < ONCOLOGY, Adult cardiology < CARDIOLOGY                                             |
|                               |                                                                                                                                                                                                                                       |

SCHOLARONE™  
Manuscripts

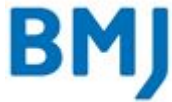

I, the Submitting Author has the right to grant and does grant on behalf of all authors of the Work (as defined in the below author licence), an exclusive licence and/or a non-exclusive licence for contributions from authors who are: i) UK Crown employees; ii) where BMJ has agreed a CC-BY licence shall apply, and/or iii) in accordance with the terms applicable for US Federal Government officers or employees acting as part of their official duties; on a worldwide, perpetual, irrevocable, royalty-free basis to BMJ Publishing Group Ltd ("BMJ") its licensees and where the relevant Journal is co-owned by BMJ to the co-owners of the Journal, to publish the Work in this journal and any other BMJ products and to exploit all rights, as set out in our [licence](#).

The Submitting Author accepts and understands that any supply made under these terms is made by BMJ to the Submitting Author unless you are acting as an employee on behalf of your employer or a postgraduate student of an affiliated institution which is paying any applicable article publishing charge ("APC") for Open Access articles. Where the Submitting Author wishes to make the Work available on an Open Access basis (and intends to pay the relevant APC), the terms of reuse of such Open Access shall be governed by a Creative Commons licence – details of these licences and which [Creative Commons](#) licence will apply to this Work are set out in our licence referred to above.

Other than as permitted in any relevant BMJ Author's Self Archiving Policies, I confirm this Work has not been accepted for publication elsewhere, is not being considered for publication elsewhere and does not duplicate material already published. I confirm all authors consent to publication of this Work and authorise the granting of this licence.

## TITLE

Integrating Patient Values and Preferences in Health Care: A Systematic Review of Qualitative Evidence

## AUTHORS

Tringale, Michael; *University of Oxford, Kellogg College, Postgraduate Researcher*  
Stephen, Genia; *University of Oxford, Kellogg College, Postgraduate Researcher*  
Boylan, Anne-Marie; *University of Oxford, Nuffield Department of Primary Care Health Sciences*

Heneghan, Carl; *University of Oxford, Primary Care Health Sciences*

Correspondence to Michael Tringale, [miketringale@gmail.com](mailto:miketringale@gmail.com)

## ABSTRACT

**Objectives** - To identify and thematically analyze how healthcare professionals (HCPs) integrate patient values and preferences (“values integration”) in primary care for adults with noncommunicable diseases (NCDs).

**Design** – Systematic review and meta-aggregation methods were used for extraction, synthesis, and analysis of qualitative evidence.

**Data sources** – Relevant records were sourced using keywords to search 12 databases (ASSIA, CINAHL, DARE, EMBASE, ERIC, Google Scholar, GreyLit, Ovid-MEDLINE, PsycINFO, PubMed-MEDLINE, Scopus, and Web of Science).

1  
2  
3  
4  
5 **Eligibility criteria** – Records needed to be published between 2000-2020 and report  
6  
7 qualitative methods and findings in English involving HCP participants regarding primary  
8  
9 care for adult patients.  
10  
11  
12  
13

14  
15 **Data extraction and synthesis** – Relevant data including participant quotations, authors'  
16  
17 observations, interpretations, and conclusions were extracted, synthesized, and analyzed in  
18  
19 a phased approach using a modified version of the Joanna Briggs Institute (JBI) Data  
20  
21 Extraction Tool, as well as EPPI Reviewer and NVivo software. The JBI Critical Appraisal  
22  
23 Checklist for Qualitative Research was used to assess methodological quality and assess  
24  
25 overall confidence and trustworthiness of included records.  
26  
27  
28  
29  
30  
31

32 **Results** – Thirty-one records involving more than 1,032 HCP participants and 1,823 HCP-  
33  
34 patient encounters were reviewed. Findings included 143 approaches to values integration  
35  
36 in clinical care, thematically analyzed and synthesized into four themes: (1) *Approaches of*  
37  
38 *Concern*; (2) *Approaches of Competence*; (3) *Approaches of Communication*; and, (4)  
39  
40 *Approaches of Congruence*. Confidence in the dependability and credibility of included  
41  
42 records was deemed high.  
43  
44  
45  
46  
47  
48

49 **Conclusions** – HCPs incorporate patient values and preferences in health care through a  
50  
51 variety of approaches including showing concern for the patient as a person, demonstrating  
52  
53 competence at managing diseases, communicating with patients as partners, and tailoring,  
54  
55 adjusting, and balancing overall care. Themes in this review provide a novel framework for  
56  
57  
58  
59  
60

1  
2  
3  
4  
5 understanding and addressing values integration in clinical care and provide useful insights  
6  
7 for policymakers, educators, and practitioners.  
8  
9

10  
11  
12 **Protocol registration** – No. [CRD42020166002](https://www.crd.york.ac.uk/prospero/) on PROSPERO international prospective  
13 register of systematic reviews <https://www.crd.york.ac.uk/prospero/> (supplemental  
14 appendix A).  
15  
16

### 17 18 19 **Strengths and limitations of this study**

- 20  
21 • This is the first systematic review to identify and thematically analyze approaches to  
22 values integration in clinical care.  
23
- 24 • An extensive search strategy and well-defined study selection criteria were employed to  
25 find qualitative evidence related to this topic.  
26
- 27 • Systematic, transparent methods were used to appraise the quality of included records,  
28 extract, and analyze data.  
29
- 30 • Thematic analysis can present limitations as it involves subjective interpretation of  
31 previously reported evidence.  
32  
33  
34  
35  
36  
37  
38  
39  
40  
41  
42  
43  
44  
45

### 46 47 **KEY MESSAGES**

48 **What is already known on this topic?** Values integration is critical to evidence-based  
49 medicine (EBM) but underrepresented in EBM research.  
50  
51

52  
53  
54  
55 **What this study adds?** This is the first systematic review to identify and thematically analyze  
56 approaches to values integration in clinical care.  
57  
58  
59  
60

1  
2  
3  
4  
5  
6  
7  
8 **How this study might affect research, practice, or policy?** Findings provide a novel  
9  
10 framework for HCPs to incorporate patient values and preferences in health care for  
11  
12 individual patients, and provides a practical model for understanding and addressing values  
13  
14 integration in research, practice, and policy.  
15  
16  
17  
18  
19

## 20 INTRODUCTION

21  
22  
23 The practice of evidence-based medicine (EBM) calls for patient values and preferences to  
24  
25 be considered and integrated by clinicians alongside the best available research and clinical  
26  
27 expertise. <sup>1</sup> These three forces comprise the EBM “triad” (figure 1) and, when  
28  
29 conscientiously and judiciously applied <sup>2</sup> by health care professionals (HCPs), it is believed  
30  
31 that optimal patient-centered care can be achieved. <sup>3</sup>  
32  
33  
34  
35  
36  
37

38 *Figure 1 – The Evidence-Based Medicine (EBM) Triad*

39  
40  
41 (FIGURE 1 HERE)  
42  
43  
44  
45

46 Delivering patient-centered care relies on understanding the patient’s values and  
47  
48 preferences at every stage, <sup>4</sup> but acquiring this knowledge is challenging. Patients and their  
49  
50 needs are heterogenous, difficult to predict, subject to change, and dependent on a many  
51  
52 factors. <sup>5</sup>  
53  
54  
55  
56  
57  
58  
59  
60

1  
2  
3  
4  
5 Patient values and preferences are the unique understandings, preferences, concerns,  
6  
7 expectations, and life circumstances of each patient. <sup>6</sup> *Values* are defined as a patient's  
8  
9 attitudes and perceptions about certain health care options, and *preferences* are their  
10  
11 preferred choices after accounting for their values. <sup>7</sup>  
12  
13  
14  
15

16  
17 A recent systematic review of qualitative studies identified a taxonomy of what patients say  
18  
19 they value in health care including uniqueness, autonomy, compassion, professionalism,  
20  
21 responsiveness, partnership, and empowerment. <sup>8</sup> While this is useful for understanding  
22  
23 what patients value and prefer, the question remains: How do HCPs *integrate* values and  
24  
25 preferences into clinical care for individual patients? Very little research has been done on  
26  
27 this critical component of EBM.  
28  
29  
30  
31  
32

33  
34 Research evidence (especially quantitative research, randomized controlled trials [RCTs] in  
35  
36 particular) <sup>9</sup> has received most of the attention in EBM, with less systematic consideration  
37  
38 given to values integration which has been "almost completely ignored" <sup>10</sup> resulting in a  
39  
40 paucity of data on values integration in clinical decision-making. <sup>11</sup>  
41  
42  
43  
44  
45

46  
47 Research on patient values and preferences – and how HCPs approach values integration –  
48  
49 tends to be reliant on qualitative evidence, <sup>8</sup> a level of evidence that does not appear in the  
50  
51 standard EBM hierarchy of evidence. <sup>12-14</sup> Considerations for patient values and preferences  
52  
53 are seldom encoded into clinical practice guidelines <sup>15</sup> and there are no established methods  
54  
55 for addressing values integration when developing guidelines. <sup>16</sup>  
56  
57  
58  
59  
60



1  
2  
3  
4  
5 Noncommunicable diseases (NCDs), also known as chronic diseases, are defined by the  
6  
7 World Health Organization (WHO) as conditions of long duration resulting from a number of  
8  
9 physical, behavioral, or environmental factors, and account for 7-out-of-10 deaths  
10  
11 worldwide.<sup>17</sup> The four most common categories of NCDs include cancers, diabetes,  
12  
13 cardiovascular (CV) diseases, and chronic respiratory diseases, often managed in primary  
14  
15 and secondary care settings.<sup>18</sup>  
16  
17  
18  
19  
20  
21

22 Improvements in patient-centered care can lead to improved outcomes including lowering  
23  
24 readmission rates, decreasing hospital lengths-of-stay, reducing mortality, and better  
25  
26 management of chronic diseases overall.<sup>17</sup> Therefore, understanding how to better  
27  
28 incorporate patient values and preferences in health care is an essential skill that can  
29  
30 improve clinical outcomes<sup>19</sup> and patient satisfaction<sup>20</sup> to help reduce the burden of NCDs.  
31  
32  
33  
34  
35  
36

37 The primary objective of this review is to identify and thematically analyze how HCPs  
38  
39 integrate patient values and preferences in primary care for adults with NCDs.  
40  
41  
42  
43

## 44 **METHODS**

### 45 **Methodology**

46  
47 This review utilized a meta-aggregation methodology.<sup>21</sup> A protocol was prospectively  
48  
49 published on the PROSPERO international register of systematic reviews,  
50  
51 <https://www.crd.york.ac.uk/prospero/> registration No. CRD42020166002 (supplemental  
52  
53 appendix A).  
54  
55  
56  
57  
58  
59  
60

## Participants and phenomena of interest

Participants included practicing HCPs in primary and secondary care: professionals with experience in direct patient care in non-inpatient and non-emergency settings, including doctors, nurses, and other clinicians.<sup>22</sup> Phenomena of interest included HCP approaches, behaviors, attitudes, perceptions, experiences, perspectives, opinions, and observations regarding values integration in clinical care.

## Information sources and search strategy

This review considered studies and other evidence published in 2000 or later with full text available in English reporting data derived from HCP participants. Only studies using qualitative methods including, but not limited to, interviews, focus groups, direct observations, surveys, narrative reviews, or content analysis were included.

Search terms were identified and adapted from an initial scoping of databases and an analysis of text from titles, abstracts, and index terms, followed by a systematic literature search of 12 databases (ASSIA, CINAHL, DARE, EMBASE, ERIC, Google Scholar, GreyLit, Ovid-MEDLINE, PsycINFO, PubMed-MEDLINE, Scopus, and Web of Science). The search was tailored to the unique formats, operators, and conventions of each database using a variety of search terms related to participants, phenomena of interest, context, setting, and qualitative methodologies and methods (supplemental appendix B).

## Study eligibility and selection

1  
2  
3  
4  
5 Two reviewers (MT and GS) participated in a four-stage screening and selection process  
6  
7 utilizing the EPPI Reviewer software<sup>23</sup> including independent double-screening<sup>24</sup> of ten  
8  
9 percent of initial abstracts and titles, single screening of remaining titles and abstracts, full-  
10  
11 text screening of all records not yet excluded, and forward-backward search and screening  
12  
13 of additional citations. Conflicts among screeners were resolved by conference and mutual  
14  
15 agreement or by a third reviewer. Inclusion/exclusion criteria were pre-determined by  
16  
17 reviewers including:  
18  
19  
20  
21  
22  
23

- 24 • Evidence type (Excluded records that did not use any qualitative methods and did not  
25 report qualitative findings);
- 26
- 27 • Date (Excluded records published before the year 2000);
- 28
- 29 • Language (Excluded records for which full text was not available in the English language);
- 30
- 31 • Phenomena of interest (Excluded records that did not report findings related to  
32 incorporating patient values and preferences);
- 33
- 34 • Target group (Excluded records that did not involve HCP participants, or were not  
35 concerned with HCP interactions with adult patients);
- 36
- 37 • Disease/condition type (Excluded records that did not refer to primary or secondary care  
38 or one of the top four most common NCD categories [oncology (cancers), cardiovascular,  
39 endocrine related (diabetes), and respiratory]).
- 40  
41  
42  
43  
44  
45  
46  
47  
48  
49  
50  
51  
52  
53

#### 54 **Appraisal of quality**

55  
56 This review sought to determine the trustworthiness of included records by considering the  
57  
58 credibility, dependability, transferability, and confirmability of qualitative findings<sup>25</sup> utilizing  
59  
60

1  
2  
3  
4  
5 the Joanna Briggs Institute (JBI) Critical Appraisal Checklist for Qualitative Research,<sup>21, 26, 27</sup> a  
6  
7 validated tool to help determine overall confidence in included records (supplemental  
8  
9 appendix C).

### 15 **Extraction, synthesis, and analysis**

16  
17 This review employed meta-aggregative methods for extraction, synthesis, and analysis.<sup>21</sup>  
18  
19 Data including participant quotations, authors' observations, interpretations, and  
20  
21 conclusions were extracted in a phased approach using a modified version of the JBI Data  
22  
23 Extraction Tool<sup>27</sup> (supplemental appendix D) as well as NVivo<sup>28</sup> computer software allowing  
24  
25 for simultaneous coding into nodes, themes, subthemes, and an initial synthesis of the  
26  
27 information.<sup>29</sup>  
28  
29  
30  
31  
32  
33

34 After initial codes and nodes were collated and analyzed, they were categorized into a  
35  
36 number of increasingly narrow sets of possible themes based on statements and ideas  
37  
38 across data. Themes were further synthesized based on patterns and similarities in their  
39  
40 meaning to arrive at a final set of primary themes that could be used as a basis for a  
41  
42 meaningful summary and interpretation. Themes were only considered if there were two or  
43  
44 more findings/codes/nodes underlying the theme.  
45  
46  
47  
48  
49  
50

### 51 **Excluded data**

52  
53 Some records reported mixed methods, but quantitative data and/or data not derived from  
54  
55 HCP participants was excluded from this review.  
56  
57  
58  
59  
60

## Patient and public involvement

It was not appropriate or possible to involve patients or the public in the design, conduct, reporting, or dissemination plans of this systematic review. However, a minority of the included records reported patient and public involvement in their methods.

## RESULTS

### Included records

The initial search identified 3,331 records and after full text screening 31 records were included (figure 2).<sup>30</sup> No systematic review regarding values integration was published between 2000 to 2020.

### Characteristics of included records

Most records were peer-reviewed published reports of original research (two are separate reports from the same study<sup>31, 32</sup>), and one was an unpublished dissertation<sup>33</sup> (table 1). The most common methods of data collection were interviews (in-depth, semi-structured [in-person and telephone]) in 14 studies, observations (real-time, in-person, or audio/video recordings) in nine studies, and focus groups in six studies. Other methods included a survey, cognitive interviewing, narrative descriptions, narrative reviews, discourse analysis, conversation analysis, document analysis, Delphi technique,<sup>34</sup> and Video Reflexive Ethnography (VRE).<sup>35</sup> Eight studies employed more than one method.

At least 1,032 HCP participants are represented in the included records, including 477 nurses/nurse practitioners, 417 physicians, and 138 other HCP types including allied

1  
2  
3  
4  
5 health professionals, pharmacists, clinical administrators, nutritionists, social workers,  
6  
7 and patient decision coaches. At least 1,823 HCP-patient consultations, encounters, or  
8  
9 interactions (either observed or described) in various clinical settings are represented in  
10  
11 the records.  
12  
13  
14  
15

16  
17 Nearly half of the studies included were conducted in North America with 15 in the  
18  
19 United States of America (USA) and two in Canada, followed by five in the United  
20  
21 Kingdom (UK), three in Australia, three in the Netherlands, two in Norway, and one each  
22  
23 in Belgium, Italy, Malaysia, and Portugal.  
24  
25  
26  
27  
28

### 29 **Methodological quality of included records**

30  
31  
32 Confidence in the dependability and credibility of included records was deemed high. Most  
33  
34 used appropriate qualitative methodologies, methods, and analytical approaches, resulting  
35  
36 in meaningful findings and conclusions. However, most records failed to provide adequate  
37  
38 reflexive statements locating researchers theoretically or culturally, and also failed to  
39  
40 address the researchers' influence on the research and vice-versa (supplemental appendix  
41  
42 C).  
43  
44  
45  
46  
47  
48

49 *Figure 2 – PRISMA Flow Diagram*

50  
51  
52 (FIGURE 2 HERE)  
53  
54  
55  
56  
57  
58  
59  
60

1 *Table 1 – Characteristics of Included Records*

| Author (Year)       | Ref. | Method(s)                                                                                 | Analytical Approach               | HCPs (n)              | Practice Setting(s)                   | HCP Experience | Encounters Observed | Location  | Number of Findings (Appendix E) |
|---------------------|------|-------------------------------------------------------------------------------------------|-----------------------------------|-----------------------|---------------------------------------|----------------|---------------------|-----------|---------------------------------|
| Aita V (2005)       | 36   | Chart Audits, Interviews, Narrative Descriptions, Note Taking, Participatory Observations | Coding, Group Analysis, Themes    | Physicians (44)       | 18 Family Practice Clinics            | Unspecified    | 1500                | USA       | 25                              |
| Chhabra KR (2012)   | 37   | Observations of Audio-Recorded Consultations                                              | Theme-Oriented Discourse Analysis | Oncologists (15)      | 2 Cancer Centers                      | Unspecified    | 20                  | USA       | 27                              |
| Davis K (2017)      | 38   | Semi-Structured Interviews                                                                | Coding, Themes                    | Physicians (33)       | Multiple Clinics in 2 HMO Territories | Mean 13-20yrs  | N/A                 | USA       | 20                              |
| Elwyn G (2000)      | 39   | Focus Groups                                                                              | Codes, Themes                     | GPs (6)               | 6 Service Settings                    | Mean 12yrs     | N/A                 | UK        | 40                              |
| Feiring E (2020)    | 40   | Document Analysis, In-Depth Interviews                                                    | Thematic Analysis                 | Various (8)           | 4 Specialist Institutions             | Unspecified    | N/A                 | Norway    | 16                              |
| Ford S (2002)*      | 32   | Semi-Structured Interviews                                                                | Constant Comparative Analysis     | Various (37)          | Hospitals & Clinics                   | Unspecified    | N/A                 | UK        | 17                              |
| Ford S (2003)*      | 31   | Semi-Structured Interviews                                                                | Constant Comparative Analysis     | Various (37)          | Hospitals & Clinics                   | Unspecified    | N/A                 | UK        | 54                              |
| Ford S (2006)       | 41   | Observation of Video-Taped Consultations                                                  | Thematic Coding                   | GPs (13)              | 12 GP Surgeries                       | Unspecified    | 149                 | UK        | 16                              |
| Friedberg MW (2013) | 42   | Semi-Structured Interviews                                                                | Codes, Themes                     | Various (23)          | 8 Primary Care                        | Unspecified    | N/A                 | USA       | 23                              |
| Golden SE (2017)    | 43   | Interviews                                                                                | Directed Content Analysis         | Various (20)          | 7 Medical Centers                     | Mean 12yrs     | N/A                 | USA       | 30                              |
| Gruß I (2019)       | 44   | Observations, Semi-Structured Interviews                                                  | Codes, Template Analysis          | Physicians (8)        | 1 Cancer Clinic                       | Unspecified    | 8                   | USA       | 24                              |
| Hall J (2011)       | 45   | Narrative Review                                                                          | Narrative Review                  | Various (Unspecified) | N/A                                   | N/A            | N/A                 | USA       | 18                              |
| Hart PL (2014)      | 46   | Mail Survey                                                                               | Thematic Analysis                 | Nurses (374)          | Hospital (43%)<br>Non-Hospital (57%)  | Mean 22.4yrs   | N/A                 | USA       | 10                              |
| Hisham R (2016)     | 47   | Focus Groups, In-Depth Interviews                                                         | Thematic Analysis                 | Physicians (18)       | 2 Rural Clinics                       | Mean 6.2yrs    | N/A                 | Malaysia  | 7                               |
| Jefford M (2002)    | 48   | Review                                                                                    | Review                            | Doctors (Unspecified) | Unspecified                           | Unspecified    | N/A                 | Australia | 27                              |
| Kennedy BM (2017)   | 49   | Focus Groups, Survey                                                                      | Thematic Categorization           | Various (7)           | 1 Rural Clinic                        | Median 12yrs   | N/A                 | USA       | 18                              |
| Landmark AM (2016)  | 50   | Observations of Video-Recorded Encounters                                                 | Conversation Analysis             | Physicians (17)       | 1 University Hospital                 | Unspecified    | 17                  | Norway    | 34                              |

|                          |    |                                                                              |                                                   |                            |                                                                                                       |                                        |     |             |    |    |    |    |    |    |    |    |    |    |    |    |    |    |    |    |    |    |    |    |    |    |    |    |    |    |  |
|--------------------------|----|------------------------------------------------------------------------------|---------------------------------------------------|----------------------------|-------------------------------------------------------------------------------------------------------|----------------------------------------|-----|-------------|----|----|----|----|----|----|----|----|----|----|----|----|----|----|----|----|----|----|----|----|----|----|----|----|----|----|--|
| 1                        | 2  | 3                                                                            | 4                                                 | 5                          | 6                                                                                                     | 7                                      | 8   | 9           | 10 | 11 | 12 | 13 | 14 | 15 | 16 | 17 | 18 | 19 | 20 | 21 | 22 | 23 | 24 | 25 | 26 | 27 | 28 | 29 | 30 | 31 | 32 | 33 | 34 | 35 |  |
| Lowen B (2009)           | 51 | Research Work Groups                                                         | Constant Comparative Analysis and Grounded Theory | PCPs (41)                  | Hospital-Based Practices                                                                              | "At Least >3yrs Post-Residency"        | N/A | USA         | 49 |    |    |    |    |    |    |    |    |    |    |    |    |    |    |    |    |    |    |    |    |    |    |    |    |    |  |
| McLeod H (2017)          | 33 | Observations of Video-Recorded Encounters, Video-Reflexive Ethnography (VRE) | Grounded Theory                                   | PCPs (17)                  | 1 Hospital-Based Clinic                                                                               | Unspecified                            | 15  | USA         | 89 |    |    |    |    |    |    |    |    |    |    |    |    |    |    |    |    |    |    |    |    |    |    |    |    |    |  |
| Murdoch J (2020)         | 52 | Observations of Video-Recorded Consultations                                 | Conversation Analysis                             | GPs (5)                    | 3 General Practices                                                                                   | Range <10 to >20yrs                    | 22  | UK          | 37 |    |    |    |    |    |    |    |    |    |    |    |    |    |    |    |    |    |    |    |    |    |    |    |    |    |  |
| Paiva D (2019)           | 53 | Focus Groups                                                                 | Grounded Theory                                   | Various (12)               | 1 Institution                                                                                         | Range 1 to >10yrs                      | N/A | Portugal    | 36 |    |    |    |    |    |    |    |    |    |    |    |    |    |    |    |    |    |    |    |    |    |    |    |    |    |  |
| Pieterse AH (2011)       | 54 | Observations of Video-Recorded Consultations                                 | Coded & Categorized Observations                  | Radiation Oncologists (10) | 1 Hospital                                                                                            | Median 7yrs                            | 25  | Netherlands | 35 |    |    |    |    |    |    |    |    |    |    |    |    |    |    |    |    |    |    |    |    |    |    |    |    |    |  |
| Salter C (2019)          | 55 | Focus Group, Interview, Observations of Video-Recorded Consultations         | Thematic Analysis                                 | GPs (5)                    | 3 General Practices                                                                                   | Range <10 to >20yrs                    | 40  | UK          | 40 |    |    |    |    |    |    |    |    |    |    |    |    |    |    |    |    |    |    |    |    |    |    |    |    |    |  |
| Schulman-Green DJ (2006) | 56 | Focus Groups                                                                 | Content Analysis                                  | Various (11)               | Hospital-Affiliated Practices                                                                         | Unspecified                            | N/A | USA         | 14 |    |    |    |    |    |    |    |    |    |    |    |    |    |    |    |    |    |    |    |    |    |    |    |    |    |  |
| Shepherd HL (2011)       | 57 | Telephone Interviews                                                         | Framework Analysis                                | Physicians (22)            | Unspecified                                                                                           | Mean 24yrs                             | N/A | Australia   | 19 |    |    |    |    |    |    |    |    |    |    |    |    |    |    |    |    |    |    |    |    |    |    |    |    |    |  |
| Shortus T (2011)         | 58 | In-Depth Interviews                                                          | Grounded Theory, Constant Comparison              | Various (29)               | "...a range of clinical settings..."                                                                  | "...a range of clinical experience..." | N/A | Australia   | 29 |    |    |    |    |    |    |    |    |    |    |    |    |    |    |    |    |    |    |    |    |    |    |    |    |    |  |
| Tracy CS (2003)          | 59 | Semi-Structured Interviews                                                   | Constant Comparative Method                       | FPs (15)                   | 15 Practices                                                                                          | Range 2-32yrs                          | N/A | Canada      | 18 |    |    |    |    |    |    |    |    |    |    |    |    |    |    |    |    |    |    |    |    |    |    |    |    |    |  |
| Van Humbeek L (2020)     | 60 | Delphi, Cognitive Interviewing, Survey                                       | Thematic Analysis                                 | Various (174)              | 2 Hospitals                                                                                           | Range <1 to >21yrs                     | N/A | Belgium     | 26 |    |    |    |    |    |    |    |    |    |    |    |    |    |    |    |    |    |    |    |    |    |    |    |    |    |  |
| Vermunt N (2019)         | 61 | Semi-Structured Interviews                                                   | Framework Analysis                                | Physicians (33)            | Hospitals and Community Clinics                                                                       | Range 3-34yrs                          | N/A | Netherlands | 29 |    |    |    |    |    |    |    |    |    |    |    |    |    |    |    |    |    |    |    |    |    |    |    |    |    |  |
| Visser LNC (2018)        | 62 | Semi-Structured Interviews                                                   | Content Analysis                                  | Oncologists (13)           | Academic and General Hospitals                                                                        | Range 4-41yrs                          | N/A | Netherlands | 31 |    |    |    |    |    |    |    |    |    |    |    |    |    |    |    |    |    |    |    |    |    |    |    |    |    |  |
| Zulman DM (2020)         | 63 | Delphi, Interviews, Observations                                             | Evidence Review                                   | Physicians (18)            | Primary Care Clinics at 1 Academic Medical Center, 1 VA Hospital, 1 Federally Qualified Health Center | Unspecified                            | 27  | USA         | 47 |    |    |    |    |    |    |    |    |    |    |    |    |    |    |    |    |    |    |    |    |    |    |    |    |    |  |

2  
3 \*Ford 2002 and Ford 2003 are two reports from the same study. (CV "Cardiovascular;" DAS-O "Decision Analysis System for Oncology;" GP "General Practitioner;" HCP "Health Care Professional;" HCP Experience Early Career  
4 <11yrs, Mid-Career 11-20yrs, Late Career ≥21yrs<sup>64</sup>; HMO "Health Maintenance Organization;" N/A "Not Applicable;" PCP "Primary Care Physician;" SD "Standard Deviation;" VA "Veteran's Administration;" VRE "Video-Reflexive  
5 Ethnography")



## FINDINGS

This review identified 143 approaches – specific behaviors, actions, practices, or experiences of HCPs – to integrating patient values and preferences in clinical care. These were thematically analyzed and synthesized into four primary themes – approaches of Concern, Competence, Communication, and Congruence – and several subthemes (table 2). See supplemental appendix E for a complete list of approaches.

*Table 2 – Taxonomy of Themes: Approaches to Values Integration*

| CONCERN                                                                                                                                                                                                   | COMPETENCE                                                                                                         | COMMUNICATION                                                                                                                                                                                                    | CONGRUENCE                                                                                                           |
|-----------------------------------------------------------------------------------------------------------------------------------------------------------------------------------------------------------|--------------------------------------------------------------------------------------------------------------------|------------------------------------------------------------------------------------------------------------------------------------------------------------------------------------------------------------------|----------------------------------------------------------------------------------------------------------------------|
| <ul style="list-style-type: none"> <li>• Advocating</li> <li>• Caring &amp; Connecting</li> <li>• Empowering</li> <li>• Inviting</li> <li>• Listening</li> <li>• Partnering</li> <li>• Sensing</li> </ul> | <ul style="list-style-type: none"> <li>• Decision Making</li> <li>• Managing</li> <li>• Professionalism</li> </ul> | <ul style="list-style-type: none"> <li>• Acknowledging</li> <li>• Clarifying</li> <li>• Encouraging</li> <li>• Exchanging Information</li> <li>• Exploring</li> <li>• Language</li> <li>• Summarizing</li> </ul> | <ul style="list-style-type: none"> <li>• Adjusting &amp; Tailoring</li> <li>• Balancing &amp; Flexibility</li> </ul> |

### Approaches of CONCERN

HCPs incorporate patient values and preferences when they demonstrate concern for the patient as a unique individual and as a partner in their own care, and show concern for diseases and their effects on the patient.

This includes **advocating** on a patient's behalf,<sup>51</sup> such as talking to HCP colleagues to get additional insights, making referrals to other specialist, or advocating for second opinions on conditions and treatments.<sup>59</sup>

1  
2  
3  
4  
5  
6 *“Advocates for the patient (includes willingness to circumvent or adapt*  
7  
8 *the system)” and “Physicians’ advocacy within (or around) the health-care*  
9  
10 *system helps patients implement jointly negotiated decisions.”*<sup>51</sup>  
11  
12  
13  
14

15 HCPs use **caring and connecting** behaviors like acting in a sincere,<sup>60</sup> relational,<sup>51</sup> and  
16  
17 empathetic manner, making the patient feel comfortable and creating a safe space to talk,  
18  
19 question, and/or disagree,<sup>33</sup> and using expressive touch.<sup>63</sup> Treating the patient as unique<sup>60</sup>  
20  
21 and seeing the patient’s perspective<sup>63</sup> are also approaches that demonstrate concern which  
22  
23 can include HCPs sharing their own personal experiences, interests, or feelings.<sup>51</sup> HCPs also  
24  
25 show compassion, empathy, and basic human concern<sup>62</sup> without being judgmental.<sup>60</sup> Other  
26  
27 such approaches include remaining present, mindful, and “in the moment”<sup>63</sup> while providing  
28  
29 care for immediate concerns, but also incorporating preventative care to demonstrate  
30  
31 concern for the patient’s overall wellbeing.<sup>36</sup>  
32  
33  
34  
35  
36  
37  
38  
39

40 *“A physician participant highlighted the importance of the physician’s*  
41  
42 *effort to act in a relational way by saying, ‘...Express caring in that*  
43  
44 *interaction – this is what the physician can do. And the quality of that*  
45  
46 *caring is what enhances the intrinsic motivation of the patient to take the*  
47  
48 *responsibility’.”*<sup>51</sup>  
49  
50  
51  
52  
53

54 HCPs also show concern by **empowering** the patient through approaches that value the  
55  
56 individual, enable self-management, and promote patient agency by recognizing, confirming,  
57  
58 and validating patient autonomy<sup>51</sup> and respecting privacy.<sup>60</sup> Empowering also includes  
59  
60

1  
2  
3 creating an environment of equality,<sup>39</sup> establishing trust by sharing control,<sup>51</sup> inviting the  
4  
5 patient to lead<sup>55</sup> or to set the pace<sup>31</sup> in clinical encounters, letting the patient have the final  
6  
7 say in decisions,<sup>60</sup> or providing opportunities to reconsider previous decisions.<sup>39</sup>  
8  
9

10  
11  
12  
13 *“The patient is enabled to keep control of his or her own situation. The*  
14  
15 *patient has authority in the decision-making process.”*<sup>60</sup>  
16  
17

18  
19  
20 HCPs also show concern by **inviting** the involvement of others<sup>43</sup> in clinical decision-making,  
21  
22 such as asking loved ones, family, or caregivers<sup>60</sup> to help the patient make choices, or  
23  
24 seeking input from colleagues, specialists, and other HCPs for advice or second opinions.<sup>51</sup>  
25  
26  
27

28  
29  
30 *“You have to have the team. You have to have the physician buy-in. And*  
31  
32 *often I ask them to bring somebody with them so that there’s somebody*  
33  
34 *else there who can hear the conversation....”*<sup>43</sup>  
35  
36  
37

38  
39  
40 HCPs show concern by **listening**, including active listening without interruption<sup>45</sup> or simple  
41  
42 silence as a response to certain patient emotions.<sup>62</sup>  
43  
44  
45

46  
47 *“The most frequently mentioned skill was the ability to listen. Listening to*  
48  
49 *patients was seen as a basic skill to enable ‘assessment of the language*  
50  
51 *that patients use in order to pitch information level’ and to ‘encourage*  
52  
53 *discussion by listening to patients’ views without interruption’.*<sup>31</sup>  
54  
55  
56

57  
58  
59 HCPs show concern by **partnering** with the patient<sup>63</sup> by investing time with them,<sup>55</sup>  
60

1  
2  
3 cultivating mutual respect to form a “therapeutic alliance,”<sup>33</sup> and treating the patient as an  
4  
5 equal partner.<sup>31</sup> Understanding the patient is a key element of partnering<sup>52</sup> as well as taking  
6  
7 a long-term view of the patient's care.  
8  
9

10  
11  
12  
13 *“Partnership process – Strategies to establish and maintain a partnership*  
14  
15 *with the patient.”*<sup>63</sup>  
16

17  
18  
19  
20 HCPs also show concern by **sensing**, i.e. perceiving and acting in a sensitive manner,  
21  
22 including interpersonal sensitivity,<sup>45</sup> cultural sensitivity,<sup>46</sup> or showing respect and  
23  
24 deference for religious beliefs.<sup>33</sup> HCPs also may use intuition in the clinical encounter<sup>45</sup> to  
25  
26 sense patient moods and feelings.  
27  
28

29  
30  
31  
32 *“There are two basic types of interpersonal sensitivity. The first type is*  
33  
34 *simply to notice (and, relatedly, remember) the other person’s*  
35  
36 *appearance, words, or nonverbal behavior.”* And *“The second, and most*  
37  
38 *commonly investigated, kind of interpersonal sensitivity involves accuracy*  
39  
40 *in interpreting cues.”*<sup>45</sup>  
41  
42  
43  
44  
45  
46

## 47 **Approaches of COMPETENCE**

48  
49  
50

51  
52 HCPs incorporate patient values and preferences when they competently address diseases,  
53  
54 share decision-making, understand and use research evidence, and professionally manage  
55  
56 patient care.  
57  
58  
59  
60

1  
2  
3 Competence includes many behaviors including **decision making**, when HCPs competently  
4 engage with the patient to support, direct, and share decision-making. Shared decision-  
5 making (SDM) was one of the most frequently mentioned approaches to incorporating  
6 patient values and preferences in the records. It is its own discipline in the patient-centered  
7 care paradigm with many adherents and a large body of evidence regarding its use and  
8 effectiveness with several SDM methods and techniques. However, as its name implies, SDM  
9 addresses values integration when making treatment decisions and does not account for the  
10 pre- and post-decision-making values and preferences that are important to patients and  
11 HCPs in their overall long-term relationships.  
12  
13  
14  
15  
16  
17  
18  
19  
20  
21  
22  
23  
24  
25  
26  
27

28 *“The physician sharing decision making acknowledges that power is*  
29 *shared and integrates the patient’s preferences into a mutual decision.”*<sup>51</sup>  
30  
31  
32  
33  
34

35 SDM also involves HCP competence with research evidence<sup>39</sup> as well as skills to help  
36 formulate the patient’s stance on issues and options,<sup>50</sup> or to negotiate decisions.<sup>51</sup> HCPs  
37 may also use decision aids or tools to assist the patient in making treatment decisions<sup>44</sup> or  
38 use vivid descriptions,<sup>50</sup> a technique to aid the patient in arriving at their own conclusions.  
39 SDM also includes directing behaviors that involve the HCP giving their own opinion or  
40 recommendation to the patient<sup>61</sup> when asked or when the patient is unable to make a  
41 decision.<sup>33</sup> It also involves listing, an action by HCPs to suggest or “draw out patients’ views  
42 about possible choices.”<sup>39</sup>  
43  
44  
45  
46  
47  
48  
49  
50  
51  
52  
53  
54  
55  
56

57 *“[If] you ask [patients] what they think is wrong with them, then they*  
58 *won’t tell you. But if you give them a list of things that are in your mind,*  
59  
60

1  
2  
3 *then they will usually identify some of their concerns.”*<sup>39</sup>  
4  
5  
6  
7

8 HCP competence also includes **managing** the patient care process to help achieve mutual  
9  
10 goals without controlling the patient, including working on mutually setting an agenda<sup>55</sup> and  
11  
12 priorities.<sup>63</sup> This also includes negotiating with patients to help them understand, assess,  
13  
14 weigh, and prioritize options,<sup>52</sup> gaining clarity on agreements and disagreements,<sup>51</sup> and  
15  
16 openly discussing the pros and cons of options.<sup>61</sup> All of this is with the intent of eventually  
17  
18 gaining agreement on issues, mutual roles, possible solutions, and next steps.<sup>58</sup> Managing  
19  
20 also refers to managing patient emotions which includes efforts to reduce patient anxiety  
21  
22 and distress,<sup>31</sup> exploring and responding to emotions, allowing time for patients to process  
23  
24 emotions, as well as HCPs displaying their own emotions.<sup>62</sup> Managing also involves planning  
25  
26 & preparing behaviors such as action plans for treatment,<sup>42</sup> agreeing on priorities,<sup>63</sup>  
27  
28 arranging follow-ups,<sup>61</sup> and collaborative goal setting.<sup>52</sup> It also includes preparing for the  
29  
30 clinical encounter to maximize the efficiency of time with the patient and readiness to elicit  
31  
32 and incorporate values and preferences.<sup>52</sup>  
33  
34  
35  
36  
37  
38  
39  
40  
41  
42

43 Another competency is to manage the administrative processes that are needed to support  
44  
45 values integration, such as having clear systematic processes for patient encounters and  
46  
47 consultations,<sup>61</sup> using electronic health records (EHR) and other methods of record keeping  
48  
49 to capture and encode patient values and preferences for future access,<sup>63</sup> leaving time for  
50  
51 questions in the encounter,<sup>43</sup> having smooth continuity of care including a system for follow-  
52  
53 up,<sup>53</sup> and collaborative action planning.<sup>55</sup>  
54  
55  
56  
57  
58

59 *“This process involved a significant investment of time, negotiation,*  
60

1  
2  
3 *deliberation, and shared decision making about the steps towards goal*  
4  
5 *attainment, as well as setting a nominal target.”*<sup>55</sup>  
6  
7  
8  
9

10 Competent management also includes **professionalism**, i.e. approaching the patient in a  
11 professional and honest manner. Honesty, transparency,<sup>43</sup> responsiveness,<sup>60</sup> and a reality-  
12 based approach<sup>58</sup> to the patient play an important role in patient-centered care and values  
13 integration, as well as being consistent with information, care, and decisions.<sup>53</sup>  
14  
15  
16  
17  
18  
19  
20  
21  
22

23 *“Professional responsiveness, Professionalism – Healthcare providers*  
24 *explain what is possible and what is not...Healthcare providers are honest*  
25 *with patients...Healthcare providers do not judge the patient’s*  
26 *situation...Healthcare providers respect the patient’s privacy.”*<sup>60</sup>  
27  
28  
29  
30  
31  
32  
33  
34

### 35 **Approaches of COMMUNICATION**

36  
37  
38  
39

40 HCPs incorporate patient values and preferences when they successfully communicate with  
41 the patient as a partner, share information and evidence, and manage patient engagement.  
42  
43  
44

45 This includes approaches like **acknowledging** the patient’s efforts to get and stay healthy or  
46 to adhere to treatment plans,<sup>63</sup> as well as expressing support or reassurance for the  
47 patient’s preferences and validating their choices.<sup>54</sup>  
48  
49  
50  
51  
52  
53  
54  
55

56 *“The second component of the practice involves acknowledging specific*  
57 *patient efforts in a genuine and positive manner.”*<sup>63</sup>  
58  
59  
60

1  
2  
3  
4  
5  
6 Values integration through communication also includes **clarifying** the patient's stances by  
7  
8 checking on the status of their choices, feelings, values, and preferences,<sup>55</sup> framing and  
9  
10 reframing<sup>52</sup> to help clarify their positions, and repeating to reinforce patient preferences.<sup>53</sup>  
11  
12 It also includes revisiting patient decisions over time<sup>58</sup> as patients may change their minds.  
13  
14 Values clarification methods<sup>60</sup> are also described in which HCPs actively engage with the  
15  
16 patient to discuss positive and negative characteristics of options to clarify which are most  
17  
18 important to the patient.  
19  
20  
21  
22  
23  
24

25 *"The mutual clarification of values can be a rewarding exercise, as it not*  
26 *only ensures the best possible decision but also demonstrates to patients*  
27 *a genuine interest in incorporating their views."*<sup>60</sup>  
28  
29  
30  
31  
32  
33  
34

35 Another communication approach is **encouraging** the patient to be active in the process, to  
36  
37 participate in the clinical encounter/conversation,<sup>37</sup> encouraging patient questions,<sup>31</sup> and  
38  
39 patient storytelling.<sup>33</sup> One technique, motivational interviewing, "uses an empathic  
40  
41 nonconfrontational style to increase the motivation for behavior change, engage patients  
42  
43 with treatment, and build therapeutic relationships."<sup>53</sup>  
44  
45  
46  
47  
48

49 *"By comparison, providers preferring 'personalized care' described their*  
50 *approach as encouraging rather than persuasive, and they were more*  
51 *accepting of different priorities and preferences."*<sup>58</sup>  
52  
53  
54  
55  
56  
57  
58  
59  
60



1  
2  
3 Values integration via communication also includes **exchanging information** including  
4  
5 explaining or defining the clinical problem <sup>61</sup> or sharing necessary biomedical information  
6  
7  
8 with the patient and informing them of the facts of the condition or diagnosis. <sup>44</sup>  
9

10  
11  
12  
13 *“Clinicians emphasized sharing medical information with patients. We*  
14  
15 *observed a few instances during which clinicians also prompted*  
16  
17 *discussion of patients' goals and values. Clinicians reported a clear*  
18  
19 *rationale in interviews as to why sharing biomedical information was*  
20  
21 *central for them.”* <sup>44</sup>  
22  
23  
24  
25  
26  
27

28 Information exchange also includes sharing and presenting research evidence, <sup>44</sup> as well as a  
29  
30 willingness to see more information and encouraging patients to seek more information. <sup>51</sup>  
31  
32  
33  
34

35 *“There was a general view that evidence-based information regarding*  
36  
37 *diagnosis and treatment options must be shared with patients during a*  
38  
39 *consultation.”* <sup>31</sup>  
40  
41  
42  
43  
44

45 Information exchange also includes patient education, <sup>48</sup> coaching, <sup>63</sup> tailoring information  
46  
47 for the patient, as well as using teaching aids, written materials, <sup>48</sup> or other educational  
48  
49 interventions. <sup>49</sup> Interviewing & eliciting approaches are other forms of information  
50  
51 exchange and they were the most frequent behaviors described in the records. HCPs use  
52  
53 various approaches to gain information from the patient, including directly eliciting patient  
54  
55 values, <sup>37</sup> preferences, <sup>38</sup> goals, <sup>56</sup> and circumstances, <sup>31</sup> sometimes referred to as patient-  
56  
57  
58  
59  
60

1  
2  
3 centered clinical interviewing.<sup>36</sup> It also involves getting patients to appraise various  
4  
5 preferences openly and to identify their favored choices.<sup>54</sup>  
6  
7  
8  
9

10 *“...this meant providing current information, risks and benefits, eliciting*  
11 *questions and adjusting information to patients’ needs, being honest*  
12 *about the limits of the physician’s and scientific knowledge, and*  
13 *presenting an opinion.”<sup>51</sup>*  
14  
15  
16  
17  
18  
19  
20  
21  
22

23 Communication also includes **exploring**, asking open-ended questions to better assess  
24 patient values, preferences, and expectations.<sup>36</sup> Studies noted the importance of openly  
25 exploring alternatives with the patient and exploring the clues and cues – verbal and non-  
26 verbal – that patients often provide.<sup>31</sup>  
27  
28  
29  
30  
31  
32  
33  
34

35 *“Explore ideas, fears, and expectations of the problem and possible*  
36 *treatments.” And, “Informants stated that experienced practitioners are*  
37 *continually alert to signals that patients accept the level of involvement*  
38 *being required of them and adapt accordingly.”<sup>39</sup>*  
39  
40  
41  
42  
43  
44  
45  
46

47 Values integration also occurs through **language** when HCPs use tones and techniques such  
48 as deferential, directive, or inviting language,<sup>37</sup> emotion-oriented speech,<sup>62</sup> or common  
49 language, terms, or phrases with patients,<sup>43</sup> all of which can support the patient’s values,  
50 preferences, and autonomy.  
51  
52  
53  
54  
55  
56  
57  
58  
59  
60

1  
2  
3 *“Deferential’ language...physicians did not evaluate each treatment on*  
4 *behalf of the patient. Instead, they used language that minimized their*  
5 *role in the patient’s decision and deferred to the patient’s autonomy.”*<sup>37</sup>  
6  
7  
8  
9

10  
11  
12  
13 When HCPs **summarize** information, choices, or next steps for patients, they are also  
14  
15 integrating values. This can be done as written or audio summaries of clinical discussions<sup>48</sup>  
16  
17 or summaries of the encounter<sup>31</sup> at the end of clinical visits to ensure that the HCP and  
18  
19 patient depart with a mutual understanding of the decisions and next steps. This also allows  
20  
21 patients to more easily share information with caregivers or other HCPs.  
22  
23  
24  
25

### 26 27 **Approaches of CONGRUENCE**

28  
29  
30  
31  
32 HCPs incorporate patient values and preferences when they customize and harmonize care  
33  
34 for each patient and balance their overall approach to care considering the patient’s values  
35  
36 and preferences, the best available research evidence, and their own clinical expertise.  
37  
38  
39

40  
41  
42 Specifically, HCPs seek congruence by **adjusting and tailoring** care for each unique patient.  
43  
44 HCPs adjust information based on a patient’s needs, values, and preferences,<sup>51</sup> as well as  
45  
46 tailor options for the patient<sup>40</sup> according the many factors that must be considered within  
47  
48 the realm of the research evidence, the patient’s values, and the HCP’s own expertise.  
49  
50  
51

52  
53  
54 *“Identify preferred format and provide tailor-made information...This*  
55 *competence consists of making the correct range of options available and*  
56  
57  
58  
59  
60

1  
2  
3 listing them in a logical sequence and in sufficient clarity so that patients  
4  
5 perceive the opportunity to take part in the decision.”<sup>39</sup>  
6  
7  
8  
9

10 HCPs also seek congruence by maintaining **balance & flexibility** regarding patient needs,  
11 values, information, communication style, decision-making, clinical/treatment approaches,  
12 and roles.<sup>41</sup> This also refers to HCP efforts to balance multiple factors such as evidence,  
13 information, issues, mutual needs, shared power and responsibilities for and with the  
14 patient.<sup>53</sup>  
15  
16  
17  
18  
19  
20  
21  
22  
23  
24

25 *“The informants stressed the importance of maintaining flexibility:*  
26 *adherence to the ‘informed choice’ approach was considered ‘another*  
27 *form of paternalism’.”<sup>39</sup>  
28  
29  
30  
31  
32  
33  
34*

## 35 DISCUSSION

36  
37  
38 Incorporating patient values and preferences in health care is critical for patient-centered  
39 care, but it is complex and requires medical knowledge as well as “soft skills” such as social,  
40 psychological, and communication proficiencies.<sup>65</sup> The themes developed in this review  
41 provide a useful model for better understanding, exploring, and teaching this topic. When  
42 plotted on the EBM Triad (figure 3), these themes also provide a useful framework for  
43 operationalizing values integration into evidence-based clinical practice.  
44  
45  
46  
47  
48  
49  
50  
51  
52  
53  
54

55 *Figure 3 – The EBM Triad and Primary Themes of Approaches to Values Integration*  
56  
57

58 (FIGURE 3 HERE)  
59  
60

1  
2  
3  
4  
5  
6 Our findings fit well into the existing EBM discussion and contribute new evidence to this  
7  
8 discussion by identifying and thematically analyzing, for the first time, the specific behaviors  
9  
10 and approaches that practicing HCPs use to integrate patient values and preferences into  
11  
12 everyday clinical care.  
13  
14

15  
16  
17  
18 Previous studies have described the importance of approaches that show concern for  
19  
20 patient autonomy,<sup>32, 48</sup> taking feelings seriously,<sup>33</sup> seeing the patient as a person, and  
21  
22 showing concern about their problems, diseases, effects, treatments, and research  
23  
24 evidence,<sup>32, 66-70</sup> as well as advising HCPs to make “statements of concern, empathy, and  
25  
26 reassurance.”<sup>70</sup>  
27  
28  
29  
30  
31

32  
33 Previous studies have also described “the competences of involving patients in healthcare  
34  
35 choices,”<sup>39</sup> the competencies required for shared decision-making,<sup>32</sup> technical  
36  
37 competencies for involving patients,<sup>41</sup> “culturally competent care,”<sup>46</sup> “competencies they  
38  
39 [HCPs] can execute to involve patients in decision making,”<sup>51</sup> and the importance of medical  
40  
41 competency for HCPs.<sup>8</sup>  
42  
43  
44  
45  
46

47  
48 Previous research has also emphasized “provider-patient communication as key to achieving  
49  
50 patient-centered care,”<sup>68</sup> patient-centered<sup>39</sup> and physician-patient communication,<sup>32</sup> and  
51  
52 the importance of skills to “communicate with patients about their treatment options.”<sup>42</sup>  
53  
54  
55

56  
57 Finally, other EBM literature encourages HCPs to ensure that “clinical goals are congruent”  
58  
59 with patient goals,<sup>36</sup> to “achieve congruence in the consultation,”<sup>41</sup> to strive for  
60

1  
2  
3 “congruency between [the patient’s] preferred and actual involvement in decision making,”  
4  
5  
6 <sup>67</sup> to seek “congruence between [patient’s] options and their values,” <sup>71</sup> and to find “more  
7  
8 balance between science, clinical expertise, and patient values.” <sup>8</sup>  
9  
10

### 11 12 13 **Strengths and limitations** 14

15 This review utilized accepted, thorough, and systematic methodologies and methods for  
16  
17 qualitative synthesis, and included a wide range of databases in the search for records.  
18

19  
20 Authors’ interpretations and participant quotes were included extensively throughout the  
21  
22 review. There remains a possibility that evidence has been missed searching only records  
23  
24 published from 2000 in English, however adherence to robust systematic review methods  
25  
26 helped to minimize this limitation.  
27  
28

29  
30  
31  
32 Although there is a paucity of qualitative studies explicitly on the topic of “integrating” or  
33  
34 “incorporating” patient values and preferences, this review identified records on related  
35  
36 topics such as “patient-centered care,” “implementing shared decision making,” “HCP-  
37  
38 patient communications,” “eliciting goals,” or “managing patient involvement,” and similar.  
39  
40 There were 17 previous reviews on related topics <sup>8, 66-81</sup> which did not qualify for inclusion in  
41  
42 this review. However a forward-backward search of references in those reviews identified  
43  
44 four records already selected for inclusion in this review <sup>37, 39, 56, 59</sup> strengthening confidence  
45  
46  
47  
48  
49 in the robustness of this review and saturation of the topic.  
50  
51

52  
53  
54 Double screening is considered best practice for systematic reviews, with single screening  
55  
56 recommended primarily as an “appropriate methodological short cut” <sup>82</sup> for experienced  
57  
58 researchers. <sup>24</sup> We double-screened ten percent of titles/abstracts and included reviewer  
59  
60

1  
2  
3 discussions and debates to arrive at mutually agreed screening criteria, before single  
4  
5 screening was conducted for the remaining records.  
6  
7  
8  
9

10 Rigorous thematic analysis methods were used to synthesize the findings and identify key  
11  
12 themes and ideas across all records. Thematic analysis involves interpretation of other  
13  
14 researchers' previous interpretations which can present limitations. To minimize this  
15  
16 limitation, we extensively reported direct verbatims and transcripts from HCP participants  
17  
18 and authors when describing concepts, themes, and subthemes to prevent  
19  
20 misinterpretation of the original evidence.  
21  
22  
23  
24  
25  
26  
27

### 28 **Implications for policy and practice**

29  
30 Integrating patient values and preferences in modern clinical practice is important  
31  
32 and impacts health outcomes.<sup>83</sup> Findings from this review could help improve health  
33  
34 policy, HCP clinical performance, or patient satisfaction and outcomes by describing  
35  
36 specific and practical patient-centered approaches to values integration.  
37  
38  
39  
40  
41

42 These findings can aid the inclusion of values integration in clinical guidelines which so  
43  
44 far has been limited<sup>15</sup> and for which there are few systematic standards.<sup>16</sup> However,  
45  
46 encoding values and preferences into a single guideline has challenges, so individual  
47  
48 HCP skills to elicit and incorporate patient values and preferences will always be  
49  
50 necessary.<sup>84</sup>  
51  
52  
53  
54  
55  
56

57 Medical education and training emphasizes patient-centered care and values  
58  
59 integration in theory, but HCPs receive inadequate instruction on the skills needed to  
60

1  
2  
3 deliver it.<sup>85</sup> This review's primary themes and descriptions of specific approaches  
4  
5 provide a theoretical and practical framework for education and training on this topic.  
6  
7

8  
9  
10 Scope of practice varies for physicians, nurses, allied health professionals, and others,  
11  
12 but this review shows they each have a role in – and something important to  
13  
14 contribute to – values integration. These findings can influence policymakers who  
15  
16 should consider the entire continuum of care and provide training, tools, funding, and  
17  
18 support and encourage values integration at every level of care delivery. These  
19  
20 findings also offer a structure to educate and assess HCPs and organizations as a  
21  
22 whole on values integration beyond the consultation and “throughout the care  
23  
24 delivery at every point.”<sup>86</sup> HCPs and health systems need to consider patient values  
25  
26 and preferences beyond just treatment decisions<sup>87</sup> and this study underscores the  
27  
28 need to be aware of, and skilled at, a number of approaches.  
29  
30  
31  
32  
33  
34  
35  
36  
37  
38  
39  
40  
41  
42  
43  
44  
45  
46  
47  
48  
49  
50  
51  
52  
53  
54  
55  
56  
57  
58  
59  
60

This review can inform clinical practice to improve HCP-patient encounters, develop  
patient-centered tools, and improve patient outcomes<sup>19</sup> and satisfaction.<sup>20</sup> Advanced  
practice providers could benefit from better clinical communications skills<sup>88</sup> and the  
approaches described in this review could provide a guide for improvement. Despite  
evidence that patient decision aids improve specific outcomes,<sup>89</sup> many HCPs don't  
use them<sup>90</sup> due to lack of awareness, availability, difficulty of use, or inappropriate  
context. Findings from this review could be useful in guiding tool developers to make  
and disseminate more effective decision aids.

## Future research



1  
2  
3 The broad themes described in this review provide multiple areas for future study. The  
4  
5 primary themes of Concern, Competence, Communication, and Congruence should be  
6  
7 explored further. While shared decision-making and HCP-patient communication are  
8  
9 already well-represented in the literature, more study is needed on other approaches such  
10  
11 as caring & connecting, planning & preparing, or goals setting, to name a few.  
12  
13  
14  
15  
16  
17

18 There is significant research in the area of shared decision-making between HCPs and  
19  
20 patients, but very little in the area of values integration outside of the decision making  
21  
22 process. Future research should explore this gap. Future studies could also seek to quantify  
23  
24 many of the qualitative findings from this review to collect evidence on what contributes to  
25  
26 better outcomes.  
27  
28  
29  
30  
31

32 Finally, the theme of Congruence described in this review – how HCPs tailor, adjust, balance,  
33  
34 and harmonize approaches for each patient – needs more scientific consideration. It is  
35  
36 underrepresented in the published literature, yet it represents the essence of evidence-  
37  
38 based medicine: the “conscientious, explicit, and judicious”<sup>91</sup> integration of patient values  
39  
40 and preferences with the best research evidence and clinical expertise.  
41  
42  
43  
44  
45  
46

### 47 **Reflexivity statement**

48  
49 The principal investigator for this review was a part-time graduate student (MT) at the  
50  
51 University of Oxford while residing and working full-time in the U.S. in the pharmaceutical  
52  
53 industry. MT has experience in designing, executing, and analyzing qualitative methods  
54  
55 involving focus groups, interviews, Delphi methods, surveys, and literature/content analysis  
56  
57 for health-related research. MT has authored or co-authored peer-reviewed and published  
58  
59  
60

1  
2  
3 articles, however, had not previously conducted a systematic review. MT is not a clinician  
4  
5 but has worked with clinicians for more than 25 years in hospital administration, health  
6  
7 education and communications, research, policy, and advocacy.  
8  
9

10  
11  
12 Author GS, living in Canada, has a clinical background, and was also enrolled in the same  
13  
14 Oxford graduate program. Authors AB and CH live in the UK, are both faculty members from  
15  
16 the University of Oxford's MSc in Evidence-Based Health Care program. Both have academic  
17  
18 and/or clinical backgrounds that include researching, writing, and teaching extensively on  
19  
20 EBM and the role of patient values and preferences. They provided supervision throughout  
21  
22 the review.  
23  
24  
25  
26  
27  
28  
29

## 30 CONCLUSION

31  
32  
33 HCPs incorporate patient values and preferences in health care through a variety of  
34  
35 approaches including: **Concern** for the patient as a person as well as diseases and their  
36  
37 effects; **Competence** at skillfully addressing diseases, research evidence, and managing  
38  
39 patient care; **Communication** with the patient as a partner, sharing information and  
40  
41 evidence, and productively managing patient encounters; and, **Congruence** to tailor, adjust,  
42  
43 and balance their approaches to overall care for each patient. Themes in this review provide  
44  
45 a novel framework for understanding and addressing values integration in clinical care and  
46  
47 provide useful insights for policymakers, educators, and practitioners.  
48  
49  
50  
51  
52  
53  
54

55 **Contributorship statement** – As principal investigator, MT led the planning, conduct, and  
56  
57 reporting of the study, submitted the manuscript, and is responsible for the overall content.  
58  
59 As research assistant, GS contributed to the conduct of the literature screening and review  
60  
as well as provided review and editing of the manuscript. As research supervisors, AMB and

1  
2  
3 CH contributed to the planning, oversight, and reporting, as well as provided review and  
4 editing of the manuscript.  
5

6  
7 **Competing interests** – CH receives grant funding from the NIHR School of Primary Care  
8 Research. He has received financial remuneration from an asbestos case and given legal  
9 advice on mesh and hormone pregnancy tests cases. He has received expenses and fees for  
10 his media work, for teaching EBM and is also paid for his GP work in NHS out of hours. He  
11 has also received income from the publication of a series of toolkit books and for appraising  
12 treatment recommendations in non-NHS settings. He is Director of CEBM and former editor  
13 in chief of BMJ-EBM. No competing interests for other authors.  
14  
15

16  
17 **Funding** – This research received no specific grant from any funding agency in the public,  
18 commercial, or not-for-profit sectors.  
19

20  
21 **Data sharing statement** – Data are available upon reasonable request. Data sharing not  
22 applicable, no datasets were generated or analyzed for this study. All data are from publicly  
23 available documents, and references are provided should readers wish to look at original  
24 sources.  
25

26  
27 **Ethics approval** – This study does not involve human or animal subjects, ethics approval not  
28 applicable.  
29

## 30 31 32 33 **REFERENCES**

- 34  
35  
36 1 Guyatt GH, Haynes RB, Jaeschke RZ, et al. Users' Guides to the Medical Literature:  
37 XXV. Evidence-Based Medicine: Principles for Applying the Users' Guides to Patient  
38 Care. *JAMA* 2000;284:1290-6 doi:10.1001/jama.284.10.1290.  
39  
40  
41  
42  
43  
44  
45 2 Sackett DL, Rosenberg WMC, Gray JAM, et al. Evidence based medicine: what it is and  
46 what it isn't. *BMJ* 1996;312:71 doi:10.1136/bmj.312.7023.71.  
47  
48  
49  
50  
51 3 Mellis C. Evidence-based medicine: What has happened in the past 50 years?. *J*  
52 *Paediatr Child Health* 2015;51:65-8 doi:10.1111/jpc.12800.  
53  
54  
55  
56  
57 4 Gooberman-Hill R. Qualitative approaches to understanding patient preferences. *The*  
58 *Patient: Patient-Centered Outcomes Research* 2012;5:215-23.  
59  
60

1  
2  
3 5 Lee YK, Low WY, Ng CJ. Exploring patient values in medical decision making: a  
4 qualitative study. *PLoS One* 2013;8:e80051 doi:10.1371/journal.pone.0080051 [doi].  
5  
6  
7

8  
9 6 Straus SE, Pattani R, Veroniki AA. Evidence-based medicine : how to practice and  
10 teach EBM. Edinburgh: Elsevier 2019.  
11  
12

13  
14  
15 7 Llewellyn-Thomas HA, Crump RT. Decision Support for Patients: Values Clarification  
16 and Preference Elicitation. *Medical Care Research and Review* 2013;70:50S-79S  
17  
18 doi:<http://ezproxy-prd.bodleian.ox.ac.uk:2094/10.1177/1077558712461182>.  
19  
20  
21

22  
23  
24 8 Bastemeijer CM, Voogt L, van Ewijk J,P., et al. What do patient values and preferences  
25 mean? A taxonomy based on a systematic review of qualitative papers. *Patient Educ*  
26  
27  
28  
29  
30  
31  
32  
33  
34  
35  
36  
37  
38  
39  
40  
41  
42  
43  
44  
45  
46  
47  
48  
49  
50  
51  
52  
53  
54  
55  
56  
57  
58  
59  
60

32 9 Fernandez A, Sturmberg J, Lukersmith S, et al. Evidence-based medicine: is it a bridge  
33 too far?. *Health research policy and systems* 2015;13:66 doi:10.1186/s12961-015-0057-  
34  
35  
36  
37  
38  
39  
40  
41  
42  
43  
44  
45  
46  
47  
48  
49  
50  
51  
52  
53  
54  
55  
56  
57  
58  
59  
60

40 10 Kelly MP, Heath I, Howick J, et al. The importance of values in evidence-based  
41  
42  
43  
44  
45  
46  
47  
48  
49  
50  
51  
52  
53  
54  
55  
56  
57  
58  
59  
60

46 11 Lown BA, Hanson JL, Clark WD. Mutual influence in shared decision making: A  
47  
48  
49  
50  
51  
52  
53  
54  
55  
56  
57  
58  
59  
60

55 12 Petrisor B, Bhandari M. The hierarchy of evidence: Levels and grades of  
56  
57  
58  
59  
60

1  
2  
3 13 Porta M, Greenland S, Burón A. A dictionary of epidemiology. Oxford, England:  
4  
5 Oxford University Press 2014.  
6  
7

8  
9 14 EBM Levels of Evidence. Available at: [https://www.cebm.ox.ac.uk/resources/levels-](https://www.cebm.ox.ac.uk/resources/levels-of-evidence/oxford-centre-for-evidence-based-medicine-levels-of-evidence-march-2009)  
10  
11 [of-evidence/oxford-centre-for-evidence-based-medicine-levels-of-evidence-march-](https://www.cebm.ox.ac.uk/resources/levels-of-evidence/oxford-centre-for-evidence-based-medicine-levels-of-evidence-march-2009)  
12  
13 [2009](https://www.cebm.ox.ac.uk/resources/levels-of-evidence/oxford-centre-for-evidence-based-medicine-levels-of-evidence-march-2009) Accessed September, 2020.  
14  
15

16  
17 15 van DW, Pieterse AH, Koelewijn-van Loon M,S., et al. How can clinical practice  
18  
19 guidelines be adapted to facilitate shared decision making? A qualitative key-informant  
20  
21 study. *BMJ Qual Saf* 2013;22:855 doi:10.1136/bmjqs-2012-001502.  
22  
23  
24

25  
26 16 Zhang Y, Coello PA, Brožek J, et al. Using patient values and preferences to inform  
27  
28 the importance of health outcomes in practice guideline development following the  
29  
30 GRADE approach. *Health and quality of life outcomes* 2017;15:52.  
31  
32  
33

34  
35 17 Noncommunicable diseases. Available at: [https://www.who.int/news-room/fact-](https://www.who.int/news-room/fact-sheets/detail/noncommunicable-diseases)  
36  
37 [sheets/detail/noncommunicable-diseases](https://www.who.int/news-room/fact-sheets/detail/noncommunicable-diseases) Accessed January 20, 2020.  
38  
39

40  
41 18 Finley CR, Chan DS, Garrison S, et al. What are the most common conditions in  
42  
43 primary care?. *Can Fam Physician* 2018;64:832.  
44  
45

46  
47 19 Gluyas H. Patient-centred care: improving healthcare outcomes. *Nurs Stand*  
48  
49 2015;30:50,7; quiz 59 doi:10.7748/ns.30.4.50.e10186 [doi].  
50  
51

52  
53 20 Wolf DM, Lehman L, Quinlin R, et al. Effect of patient-centered care on patient  
54  
55 satisfaction and quality of care. *J Nurs Care Qual* 2008;23:316-21  
56  
57 doi:10.1097/01.NCQ.0000336672.02725.a5 [doi].  
58  
59  
60

1  
2  
3 21 Lockwood D, Munn Z, Porritt K. Qualitative research synthesis: methodological  
4  
5 guidance for systematic reviewers utilizing meta-aggregation. *Int J Evid Based Healthc*  
6  
7 2015;13:179-87.  
8  
9

10  
11 22 Transforming and scaling up health professionals' education and training: World  
12  
13 Health Organization Guidelines. Available at:  
14  
15 [https://www.who.int/publications/i/item/transforming-and-scaling-up-health-](https://www.who.int/publications/i/item/transforming-and-scaling-up-health-professionals'-education-and-training)  
16  
17 [professionals'-education-and-training](https://www.who.int/publications/i/item/transforming-and-scaling-up-health-professionals'-education-and-training) Accessed January, 2020.  
18  
19

20  
21 23 EPPI Reviewer 4 For Systematic Reviews. Available at:  
22  
23 <http://eppi.ioe.ac.uk/cms/Default.aspx?alias=eppi.ioe.ac.uk/cms/er4> Accessed January,  
24  
25 2020.  
26  
27  
28

29  
30 24 Mahtani KR, Heneghan C, Aronson J. Single screening or double screening for study  
31  
32 selection in systematic reviews?. *BMJ EBM* 2020;25:149-50 doi:10.1136/bmjebm-2019-  
33  
34 111269.  
35  
36  
37

38  
39 25 Lincoln YS, Guba EG. *Naturalistic inquiry*. Beverly Hills; London: Sage 1985.  
40  
41

42  
43 26 Lockwood C, Porritt K, Munn Z, Rittenmeyer L, Salmond S, Bjerrum M, Loveday H,  
44  
45 Carrier J, Stannard D, Aromataris E, Munn Z (Editors). *JB I Reviewer's Manual - Chapter*  
46  
47 *2: Systematic Review of Qualitative Evidence*, . *Joanna Briggs Institute (JBI)* 2017.  
48  
49

50  
51 27 Aromataris E, Munn Z (Editors). *Joanna Briggs Institute Reviewer's*  
52  
53 *Manual* 2017:Chapter 2.  
54  
55  
56  
57  
58  
59  
60

1  
2  
3 28 NVivo for Qualitative Research. Available at:

4  
5  
6 <https://www.qsrinternational.com/nvivo-qualitative-data-analysis-software/home>

7  
8 Accessed March, 2020.

9  
10  
11 29 Bryman A. Social research methods. Oxford: Oxford University Press 2012.

12  
13  
14  
15 30 Liberati A, Altman DG, Tetzlaff J, et al. The PRISMA statement for reporting  
16 systematic reviews and meta-analyses of studies that evaluate health care  
17 interventions: Explanation and elaboration. *PLoS Medicine* 2009;6  
18  
19  
20  
21  
22  
23 doi:10.1371/journal.pmed.1000100.

24  
25  
26 31 Ford S, Schofield T, Hope T. What are the ingredients for a successful evidence-based  
27 patient choice consultation?: A qualitative study. *Soc Sci Med* 2003;56:589-602  
28  
29  
30  
31  
32  
33  
34  
35  
36  
37  
38  
39  
40  
41  
42  
43  
44  
45  
46  
47  
48  
49  
50  
51  
52  
53  
54  
55  
56  
57  
58  
59  
60  
doi:<http://dx.doi.org/10.1016/S0277-9536%2802%2900056-4>.

32 Ford S, Schofield T, Hope T. Barriers to the evidence-based patient choice (EBPC)  
33 consultation. *Patient Educ Couns* 2002;47:179-85 doi:10.1016/S0738-3991(01)00198-7.

41  
42  
43  
44  
45  
46  
47  
48  
49  
50  
51  
52  
53  
54  
55  
56  
57  
58  
59  
60  
33 McLeod H. Respect and shared decision making in the clinical encounter, A Video-  
Reflexive Ethnography 2017.

46  
47  
48  
49  
50  
51  
52  
53  
54  
55  
56  
57  
58  
59  
60  
34 Powell C. The Delphi technique: myths and realities. *J Adv Nurs* 2003;41:376-82  
doi:10.1046/j.1365-2648.2003.02537.x.

53  
54  
55  
56  
57  
58  
59  
60  
35 Iedema R, Carroll K, Collier A, et al. Video-reflexive ethnography in health research  
and healthcare improvement : theory and application. Boca Raton: CRC Press 2018.

1  
2  
3 36 Aita V, McIlvain H, Backer E, et al. Patient-centered care and communication in  
4 primary care practice: what is involved?. *Patient Educ Couns* 2005;58:296-304.  
5  
6  
7

8  
9 37 Chhabra KR, Pollak KI, Lee SJ, et al. Physician communication styles in initial  
10 consultations for hematological cancer. *Patient Educ Couns* 2013;93:573-8  
11  
12  
13  
14 doi:<https://dx.doi.org/10.1016/j.pec.2013.08.023>.  
15  
16

17  
18 38 Davis K, Bellini P, Hagerman C, et al. Physicians' Perceptions of Factors Influencing  
19 the Treatment Decision-making Process for Men With Low-risk Prostate Cancer.  
20  
21  
22  
23 *Urology* 2017;107:86-95 doi:<https://dx.doi.org/10.1016/j.urology.2017.02.056>.  
24  
25

26 39 Elwyn G, Edwards A, Kinnersley P, et al. Shared decision making and the concept of  
27 equipoise: the competences of involving patients in healthcare choices. *Br J Gen Pract*  
28  
29  
30  
31 2000;50:892.  
32  
33

34 40 Feiring E, Friis T. Facilitators and barriers to clinicians' use of COPD action plans in  
35 self-management support: A qualitative study. *Patient Educ Couns* 2020;103:693-701  
36  
37  
38  
39  
40 doi:<http://dx.doi.org/10.1016/j.pec.2019.11.002>.  
41  
42

43 41 Ford S, Schofield T, Hope T. Observing decision-making in the general practice  
44 consultation: who makes which decisions?. *Health Expectations* 2006;9.  
45  
46  
47

48  
49 42 Friedberg MW, Van Busum K, Wexler R, et al. A demonstration of shared decision  
50 making in primary care highlights barriers to adoption and potential remedies. *Health*  
51  
52  
53  
54 *Aff (Millwood )* 2013;32:268 doi:10.1377/hlthaff.2012.1084.  
55  
56  
57  
58  
59  
60



- 1  
2  
3 43 Golden SE, Thomas CR, Moghanaki D, et al. Dumping the information bucket: A  
4  
5 qualitative study of clinicians caring for patients with early stage non-small cell lung  
6  
7 cancer. *Patient Educ Couns* 2017;100:861-70 doi:10.1016/j.pec.2016.12.023.  
8  
9  
10  
11 44 Gruß I, McMullen CK. Barriers to eliciting patient goals and values in shared  
12  
13 decision-making breast cancer surgery consultations: An ethnographic and interview  
14  
15 study. *Psycho - Oncology* 2019;28:2233-9 doi:[http://ezproxy-](http://ezproxy-prd.bodleian.ox.ac.uk:2094/10.1002/pon.5212)  
16  
17 [prd.bodleian.ox.ac.uk:2094/10.1002/pon.5212](http://ezproxy-prd.bodleian.ox.ac.uk:2094/10.1002/pon.5212).  
18  
19  
20  
21  
22 45 Hall JA. Clinicians' accuracy in perceiving patients: Its relevance for clinical practice  
23  
24 and a narrative review of methods and correlates. *Patient Educ Couns* 2011;84:319-24  
25  
26 doi:<http://dx.doi.org/10.1016/j.pec.2011.03.006>.  
27  
28  
29  
30  
31 46 Hart PL, Mareno N. Cultural challenges and barriers through the voices of nurses. *J*  
32  
33 *Clin Nurs* 2014;23:2223-33 doi:10.1111/jocn.12500.  
34  
35  
36  
37 47 Hisham R, Liew SM, Ng CJ, et al. Rural doctors' views on and experiences with  
38  
39 evidence-based medicine: The FrEEDoM qualitative study. *PLoS ONE* 2016;11:e0152649  
40  
41 doi:<http://dx.doi.org/10.1371/journal.pone.0152649>.  
42  
43  
44  
45 48 Jefford M, Tattersall MHN. Informing and involving cancer patients in their own care.  
46  
47 *The lancet oncology* 2002;3:629-37.  
48  
49  
50  
51 49 Kennedy BM, Rehman M, Johnson WD, et al. Healthcare Providers versus Patients'  
52  
53 Understanding of Health Beliefs and Values. *Patient exp j* 2017;4:29-37.  
54  
55  
56  
57  
58  
59  
60

1  
2  
3 50 Landmark AMD, Svennevig J, Gulbrandsen P. Negotiating treatment preferences:

4  
5 Physicians' formulations of patients' stance. *Soc Sci Med* 2016;149:26-36

6  
7 doi:<https://dx.doi.org/10.1016/j.socscimed.2015.11.035>.

8  
9  
10  
11 51 Lown BA, Hanson JL, Clark WD. Mutual influence in shared decision making: A

12  
13 collaborative study of patients and physicians. *Health Expect* 2009;12:160-74

14  
15 doi:<http://dx.doi.org/10.1111/j.1369-7625.2008.00525.x>.

16  
17  
18  
19 52 Murdoch J, Salter C, Ford J, et al. The "unknown territory" of goal-setting:

20  
21 Negotiating a novel interactional activity within primary care doctor-patient

22  
23 consultations for patients with multiple chronic conditions. *Soc Sci Med*

24  
25 2020;256:113040 doi:<https://dx.doi.org/10.1016/j.socscimed.2020.113040>.

26  
27  
28  
29 53 Paiva D, Abreu L, Azevedo A, et al. Patient-centered communication in type 2

30  
31 diabetes: The facilitating and constraining factors in clinical encounters. *Health Serv Res*

32  
33 2019;54:623-35 doi:10.1111/1475-6773.13126 [doi].

34  
35  
36  
37 54 Pieterse AH, Henselmans I, de Haes, H. C. J. M., et al. Shared decision making:

38  
39 Prostate cancer patients' appraisal of treatment alternatives and oncologists' eliciting

40  
41 and responding behavior, an explorative study. *Patient Educ Couns* 2011;85:e251-9

42  
43 doi:<http://dx.doi.org/10.1016/j.pec.2011.05.012>.

44  
45  
46  
47 55 Salter C, Shiner A, Lenaghan E, et al. Setting goals with patients living with

48  
49 multimorbidity: qualitative analysis of general practice consultations. *The British journal*

50  
51 *of general practice : the journal of the Royal College of General Practitioners*

52  
53 2019;69:e479 doi:10.3399/bjgp19X704129.

1  
2  
3 56 Schulman-Green D, Naik AD, Bradley EH, et al. Goal setting as a shared decision  
4 making strategy among clinicians and their older patients. *Patient Educ Couns*  
5  
6 2006;63:145-51.  
7  
8  
9

10  
11 57 Shepherd HL, Butow PN, Tattersall MHN. Factors which motivate cancer doctors to  
12 involve their patients in reaching treatment decisions. *Patient Educ Couns* 2011;84:229-  
13  
14 35 doi:<https://dx.doi.org/10.1016/j.pec.2010.10.018>.  
15  
16  
17  
18

19  
20 58 Shortus T, Kemp L, McKenzie S, et al. 'Managing patient involvement': provider  
21 perspectives on diabetes decision-making. *Health Expectations* 2013;16.  
22  
23  
24

25  
26 59 Tracy CS, Dantas GC, Upshur REG. Evidence-based medicine in primary care:  
27 qualitative study of family physicians. *BMC Fam Pract* 2003;4:6.  
28  
29  
30

31  
32 60 Van Humbeeck L, Malfait S, Holvoet E, et al. Value discrepancies between nurses and  
33 patients: A survey study. *Nurs Ethics* 2020;27:1044-55  
34  
35 doi:<https://dx.doi.org/10.1177/0969733020906595>.  
36  
37  
38  
39

40  
41 61 Vermunt N, Elwyn G, Westert G, et al. Goal setting is insufficiently recognised as an  
42 essential part of shared decision-making in the complex care of older patients: a  
43 framework analysis. *BMC Fam Pract* 2019;20:76 doi:[https://dx.doi.org/10.1186/s12875-](https://dx.doi.org/10.1186/s12875-019-0966-z)  
44  
45  
46  
47  
48  
49  
50

51  
52 62 Visser LNC, Schepers S, Tollenaar MS, et al. Patients' and oncologists' views on how  
53 oncologists may best address patients' emotions during consultations: An interview  
54 study. *Patient Educ Couns* 2018;101:1223-31 doi:S0738-3991(18)30077-6 [pii].  
55  
56  
57  
58  
59  
60

1  
2  
3 63 Zulman DM, Haverfield MC, Shaw JG, et al. Practices to foster physician presence  
4 and connection with patients in the clinical encounter. *JAMA: Journal of the American*  
5  
6  
7  
8 *Medical Association* 2020;323:70-81.  
9

10  
11 64 Dyrbye LN, Varkey P, Boone SL, et al. Physician Satisfaction and Burnout at Different  
12  
13  
14  
15  
16  
17  
18  
19  
20  
21  
22  
23  
24  
25  
26  
27  
28  
29  
30  
31  
32  
33  
34  
35  
36  
37  
38  
39  
40  
41  
42  
43  
44  
45  
46  
47  
48  
49  
50  
51  
52  
53  
54  
55  
56  
57  
58  
59  
60  
61  
62  
63  
64  
65  
66  
67  
68  
69  
70  
71  
72  
73  
74  
75  
76  
77  
78  
79  
80  
81  
82  
83  
84  
85  
86  
87  
88  
89  
90  
91  
92  
93  
94  
95  
96  
97  
98  
99  
100  
101  
102  
103  
104  
105  
106  
107  
108  
109  
110  
111  
112  
113  
114  
115  
116  
117  
118  
119  
120  
121  
122  
123  
124  
125  
126  
127  
128  
129  
130  
131  
132  
133  
134  
135  
136  
137  
138  
139  
140  
141  
142  
143  
144  
145  
146  
147  
148  
149  
150  
151  
152  
153  
154  
155  
156  
157  
158  
159  
160  
161  
162  
163  
164  
165  
166  
167  
168  
169  
170  
171  
172  
173  
174  
175  
176  
177  
178  
179  
180  
181  
182  
183  
184  
185  
186  
187  
188  
189  
190  
191  
192  
193  
194  
195  
196  
197  
198  
199  
200  
201  
202  
203  
204  
205  
206  
207  
208  
209  
210  
211  
212  
213  
214  
215  
216  
217  
218  
219  
220  
221  
222  
223  
224  
225  
226  
227  
228  
229  
230  
231  
232  
233  
234  
235  
236  
237  
238  
239  
240  
241  
242  
243  
244  
245  
246  
247  
248  
249  
250  
251  
252  
253  
254  
255  
256  
257  
258  
259  
260  
261  
262  
263  
264  
265  
266  
267  
268  
269  
270  
271  
272  
273  
274  
275  
276  
277  
278  
279  
280  
281  
282  
283  
284  
285  
286  
287  
288  
289  
290  
291  
292  
293  
294  
295  
296  
297  
298  
299  
300  
301  
302  
303  
304  
305  
306  
307  
308  
309  
310  
311  
312  
313  
314  
315  
316  
317  
318  
319  
320  
321  
322  
323  
324  
325  
326  
327  
328  
329  
330  
331  
332  
333  
334  
335  
336  
337  
338  
339  
340  
341  
342  
343  
344  
345  
346  
347  
348  
349  
350  
351  
352  
353  
354  
355  
356  
357  
358  
359  
360  
361  
362  
363  
364  
365  
366  
367  
368  
369  
370  
371  
372  
373  
374  
375  
376  
377  
378  
379  
380  
381  
382  
383  
384  
385  
386  
387  
388  
389  
390  
391  
392  
393  
394  
395  
396  
397  
398  
399  
400  
401  
402  
403  
404  
405  
406  
407  
408  
409  
410  
411  
412  
413  
414  
415  
416  
417  
418  
419  
420  
421  
422  
423  
424  
425  
426  
427  
428  
429  
430  
431  
432  
433  
434  
435  
436  
437  
438  
439  
440  
441  
442  
443  
444  
445  
446  
447  
448  
449  
450  
451  
452  
453  
454  
455  
456  
457  
458  
459  
460  
461  
462  
463  
464  
465  
466  
467  
468  
469  
470  
471  
472  
473  
474  
475  
476  
477  
478  
479  
480  
481  
482  
483  
484  
485  
486  
487  
488  
489  
490  
491  
492  
493  
494  
495  
496  
497  
498  
499  
500  
501  
502  
503  
504  
505  
506  
507  
508  
509  
510  
511  
512  
513  
514  
515  
516  
517  
518  
519  
520  
521  
522  
523  
524  
525  
526  
527  
528  
529  
530  
531  
532  
533  
534  
535  
536  
537  
538  
539  
540  
541  
542  
543  
544  
545  
546  
547  
548  
549  
550  
551  
552  
553  
554  
555  
556  
557  
558  
559  
560  
561  
562  
563  
564  
565  
566  
567  
568  
569  
570  
571  
572  
573  
574  
575  
576  
577  
578  
579  
580  
581  
582  
583  
584  
585  
586  
587  
588  
589  
590  
591  
592  
593  
594  
595  
596  
597  
598  
599  
600  
601  
602  
603  
604  
605  
606  
607  
608  
609  
610  
611  
612  
613  
614  
615  
616  
617  
618  
619  
620  
621  
622  
623  
624  
625  
626  
627  
628  
629  
630  
631  
632  
633  
634  
635  
636  
637  
638  
639  
640  
641  
642  
643  
644  
645  
646  
647  
648  
649  
650  
651  
652  
653  
654  
655  
656  
657  
658  
659  
660  
661  
662  
663  
664  
665  
666  
667  
668  
669  
670  
671  
672  
673  
674  
675  
676  
677  
678  
679  
680  
681  
682  
683  
684  
685  
686  
687  
688  
689  
690  
691  
692  
693  
694  
695  
696  
697  
698  
699  
700  
701  
702  
703  
704  
705  
706  
707  
708  
709  
710  
711  
712  
713  
714  
715  
716  
717  
718  
719  
720  
721  
722  
723  
724  
725  
726  
727  
728  
729  
730  
731  
732  
733  
734  
735  
736  
737  
738  
739  
740  
741  
742  
743  
744  
745  
746  
747  
748  
749  
750  
751  
752  
753  
754  
755  
756  
757  
758  
759  
760  
761  
762  
763  
764  
765  
766  
767  
768  
769  
770  
771  
772  
773  
774  
775  
776  
777  
778  
779  
780  
781  
782  
783  
784  
785  
786  
787  
788  
789  
790  
791  
792  
793  
794  
795  
796  
797  
798  
799  
800  
801  
802  
803  
804  
805  
806  
807  
808  
809  
810  
811  
812  
813  
814  
815  
816  
817  
818  
819  
820  
821  
822  
823  
824  
825  
826  
827  
828  
829  
830  
831  
832  
833  
834  
835  
836  
837  
838  
839  
840  
841  
842  
843  
844  
845  
846  
847  
848  
849  
850  
851  
852  
853  
854  
855  
856  
857  
858  
859  
860  
861  
862  
863  
864  
865  
866  
867  
868  
869  
870  
871  
872  
873  
874  
875  
876  
877  
878  
879  
880  
881  
882  
883  
884  
885  
886  
887  
888  
889  
890  
891  
892  
893  
894  
895  
896  
897  
898  
899  
900  
901  
902  
903  
904  
905  
906  
907  
908  
909  
910  
911  
912  
913  
914  
915  
916  
917  
918  
919  
920  
921  
922  
923  
924  
925  
926  
927  
928  
929  
930  
931  
932  
933  
934  
935  
936  
937  
938  
939  
940  
941  
942  
943  
944  
945  
946  
947  
948  
949  
950  
951  
952  
953  
954  
955  
956  
957  
958  
959  
960  
961  
962  
963  
964  
965  
966  
967  
968  
969  
970  
971  
972  
973  
974  
975  
976  
977  
978  
979  
980  
981  
982  
983  
984  
985  
986  
987  
988  
989  
990  
991  
992  
993  
994  
995  
996  
997  
998  
999  
1000

64 Dyrbye LN, Varkey P, Boone SL, et al. Physician Satisfaction and Burnout at Different  
Career Stages. *Mayo Clin Proc* 2013;88:1358-67  
doi:<https://doi.org/10.1016/j.mayocp.2013.07.016>.

65 Salloch S, Otte IC, Reinacher-Schick A, et al. Physician perspectives on the impact of  
patient preferences and the role of next-of-kin of patients in evidence-based decision-  
making: A qualitative interview study from oncology. *Zeitschrift für Evidenz, Fortbildung  
und Qualität im Gesundheitswesen* 2018;131:46-52.

66 Contreary K, Collins A, Rich EC. Barriers to evidence-based physician decision-making  
at the point of care: A narrative literature review. *Journal of Comparative Effectiveness  
Research* 2017;6:51-63 doi:10.2217/cer-2016-0043.

67 Covvey JR, Kamal KM, Gorse EE, et al. Barriers and facilitators to shared decision-  
making in oncology: a systematic review of the literature. *Supportive Care Cancer*  
2019;27:1613-37 doi:<http://dx.doi.org/10.1007/s00520-019-04675-7>.

68 Dwamena F, Holmes-Rovner M, Gauden CM, et al. Interventions for providers to  
promote a patient-centred approach in clinical consultations. *Cochrane Database Syst  
Rev* 2012;2012:CD003267 doi:<http://dx.doi.org/10.1002/14651858.CD003267.pub2>.

1  
2  
3 69 Harrington J, Noble LM, Newman SP. Improving patients' communication with  
4  
5 doctors: a systematic review of intervention studies. *Patient Educ Couns* 2004;52:7-16  
6  
7  
8 doi:S073839910300017X [pii].  
9

10  
11 70 Lewin SA, Skea ZC, Entwistle V, et al. Interventions for providers to promote a  
12  
13 patient-centred approach in clinical consultations. *Cochrane Database Syst Rev*  
14  
15  
16 2001:CD003267.  
17

18  
19  
20 71 Stacey D, Legare F, Lewis K, et al. Decision aids for people facing health treatment or  
21  
22 screening decisions. *Cochrane Database Syst Rev* 2017;4:CD001431  
23  
24  
25 doi:10.1002/14651858.CD001431.pub5 [doi].  
26

27  
28  
29 72 Gravel K, Légaré F, Graham ID. Barriers and facilitators to implementing shared  
30  
31 decision-making in clinical practice: a systematic review of health professionals'  
32  
33 perceptions. *Implementation science : IS* 2006;1:16 doi:10.1186/1748-5908-1-16.  
34

35  
36  
37 73 Harrison M, Milbers K, Hudson M, et al. Do patients and health care providers have  
38  
39 discordant preferences about which aspects of treatments matter most? Evidence from  
40  
41 a systematic review of discrete choice experiments. *BMJ Open* 2017;7:e014719-014719  
42  
43  
44 doi:10.1136/bmjopen-2016-014719 [doi].  
45

46  
47  
48 74 Johnson RA, Huntley A, Hughes RA, et al. Interventions to support shared decision  
49  
50 making for hypertension: A systematic review of controlled studies. *Health Expectations*  
51  
52 2018;21:1191-207 doi:<http://ezproxy-prd.bodleian.ox.ac.uk:2094/10.1111/hex.12826>.  
53

54  
55  
56 75 Laidsaar-Powell RC, Butow PN, Bu S, et al. Physician-patient-companion  
57  
58 communication and decision-making: A systematic review of triadic medical  
59  
60

1  
2  
3 consultations. *Patient Educ Couns* 2013;91:3-13

4  
5 doi:<http://dx.doi.org/10.1016/j.pec.2012.11.007>.

6  
7  
8  
9 76 Légaré F, Ratté S, Gravel K, et al. Barriers and facilitators to implementing shared  
10 decision-making in clinical practice: Update of a systematic review of health  
11 professionals' perceptions. *Patient Educ Couns* 2008;73:526-35

12  
13  
14  
15  
16 doi:<https://doi.org/10.1016/j.pec.2008.07.018>.

17  
18  
19  
20 77 Mangin D, Stephen G, Bismah V, et al. Making patient values visible in healthcare: a  
21 systematic review of tools to assess patient treatment priorities and preferences in the  
22 context of multimorbidity. *BMJ open* 2016;6:e010903.

23  
24  
25  
26  
27  
28 78 Marsh K, Caro J, Hamed A, et al. Amplifying Each Patient's Voice: A Systematic  
29 Review of Multi-criteria Decision Analyses Involving Patients. *Appl Health Econ Health*  
30  
31  
32  
33  
34  
35  
36  
37  
38  
39  
40  
41  
42  
43  
44  
45  
46  
47  
48  
49  
50  
51  
52  
53  
54  
55  
56  
57  
58  
59  
60  
*Policy* 2017;15:155-62 doi:10.1007/s40258-016-0299-1.

79 Truglio-Londrigan M, Slyer JT. Shared Decision-Making for Nursing Practice: An  
Integrative Review. *The open nursing journal* 2018;12:1  
doi:10.2174/1874434601812010001.

80 Truglio-Londrigan M, Slyer JT, Singleton JK, et al. A qualitative systematic review of  
internal and external influences on shared decision-making in all health care settings.  
*JBI Libr Syst Rev* 2012;10:4633-46.

81 Zwolsman S, Te Pas E, Hooft L, et al. Barriers to GPs' use of evidence-based medicine:  
A systematic review. *Br J Gen Pract* 2012;62:e511-21  
doi:<http://dx.doi.org/10.3399/bjgp12X652382>.

1  
2  
3 82 Waffenschmidt S, Knelangen M, Sieben W, et al. Single screening versus  
4  
5 conventional double screening for study selection in systematic reviews: a  
6  
7 methodological systematic review.(Report). *BMC Medical Research Methodology*  
8  
9 2019;19 doi:10.1186/s12874-019-0782-0.  
10  
11

12  
13  
14 83 Doyle C, Lennox L, Bell D. A systematic review of evidence on the links between  
15  
16 patient experience and clinical safety and effectiveness. *BMJ Open* 2013;3:e001570  
17  
18 doi:10.1136/bmjopen-2012-001570.  
19  
20

21  
22  
23 84 Lewis DK, Robinson J, Wilkinson E. Factors involved in deciding to start preventive  
24  
25 treatment: qualitative study of clinicians' and lay people's attitudes. *BMJ* 2003;327:841  
26  
27 doi:10.1136/bmj.327.7419.841.  
28  
29

30  
31 85 Henschen BL, Ryan ER, Evans DB, et al. Perceptions of Patient-Centered Care among  
32  
33 First-Year Medical Students. *Teach Learn Med* 2019;31:26-33  
34  
35 doi:10.1080/10401334.2018.1468260 [doi].  
36  
37

38  
39 86 Armstrong MJ, Mullins CD. Value Assessment at the Point of Care: Incorporating  
40  
41 Patient Values throughout Care Delivery and a Draft Taxonomy of Patient Values. *Value*  
42  
43 *in Health : The Journal of the International Society for Pharmacoeconomics and*  
44  
45 *Outcomes Research* 2017;20:292.  
46  
47

48  
49  
50 87 Lee YK, Low WY, Ng CJ. Exploring patient values in medical decision making: a  
51  
52 qualitative study. *PloS one* 2013;8.  
53  
54  
55  
56  
57  
58  
59  
60

1  
2  
3 88 Back AL, Fromme EK, Meier DE. Training Clinicians with Communication Skills

4  
5  
6 Needed to Match Medical Treatments to Patient Values. *J Am Geriatr Soc*

7  
8 2019;67:S435-41 doi:<https://doi.org/10.1111/jgs.15709>.

9  
10  
11 89 O'connor A. Using patient decision aids to promote evidence-based decision making.

12  
13  
14 *Evid Based Med* 2001;6:100 doi:10.1136/ebm.6.4.100.

15  
16  
17 90 Brace C, Schmocker S, Huang H, et al. Physicians' Awareness and Attitudes Toward

18  
19  
20 Decision Aids for Patients With Cancer. *JCO* 2010;28:2286-92

21  
22  
23 doi:10.1200/JCO.2009.25.2874.

24  
25  
26 91 Sackett DL, Straus S, Richardson W, et al. Evidence-based medicine: how to practice

27  
28  
29 and teach EBM. Edinburgh: Churchill Livingstone 2000.



1  
2  
3  
4  
5  
6  
7  
8  
9  
10  
11  
12  
13  
14  
15  
16  
17  
18  
19  
20  
21  
22  
23  
24  
25  
26  
27  
28  
29  
30  
31  
32  
33  
34  
35  
36  
37  
38  
39  
40  
41  
42  
43  
44  
45  
46  
47  
48  
49  
50  
51  
52  
53  
54  
55  
56  
57  
58  
59  
60

*Figure 1 – The Evidence-Based Medicine (EBM) Triad*

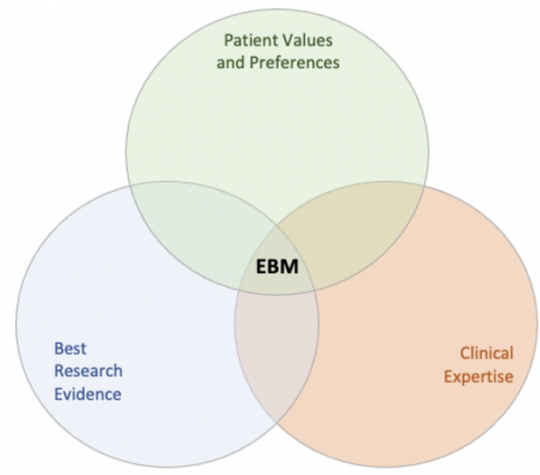

Figure 1 – The Evidence-Based Medicine (EBM) Triad

220x135mm (144 x 144 DPI)

Figure 2 – PRISMA Flow Diagram

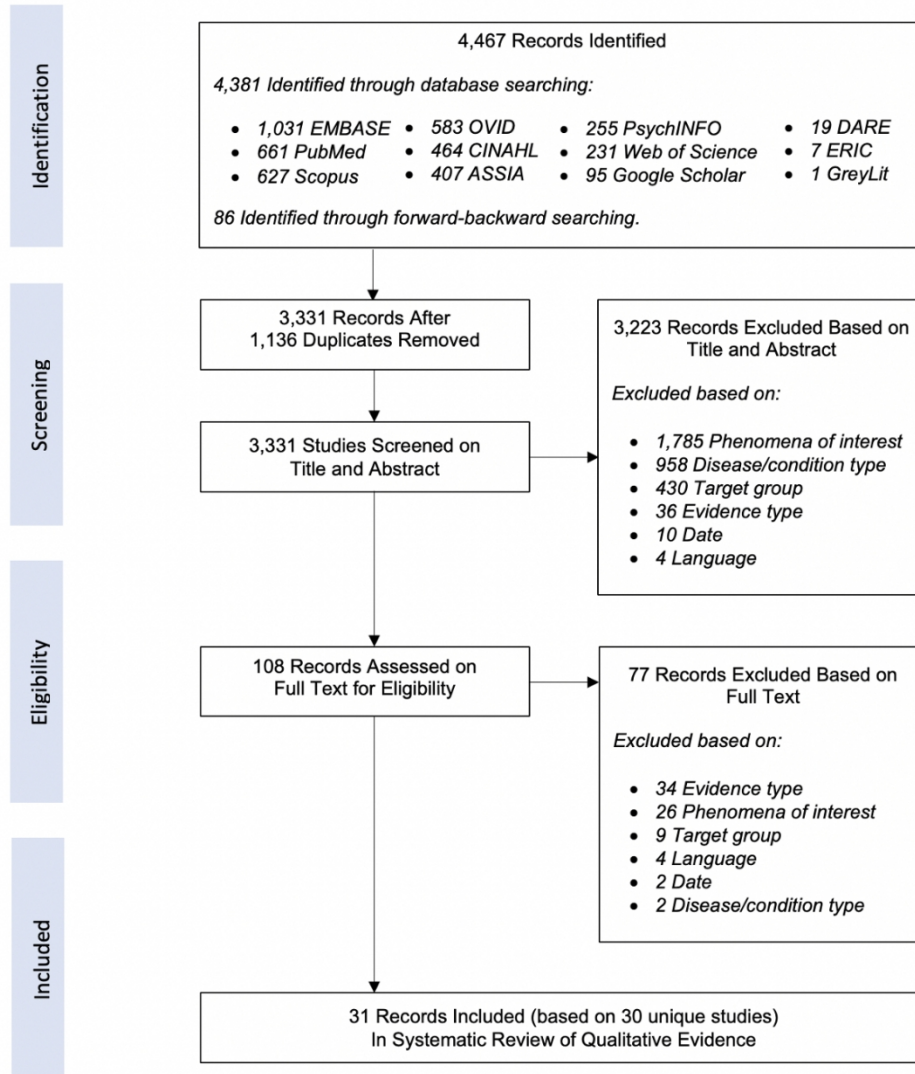

Figure 2 – PRISMA Flow Diagram

219x265mm (144 x 144 DPI)

1  
2  
3  
4  
5  
6  
7  
8  
9  
10  
11  
12  
13  
14  
15  
16  
17  
18  
19  
20  
21  
22  
23  
24  
25  
26  
27  
28  
29  
30  
31  
32  
33  
34  
35  
36  
37  
38  
39  
40  
41  
42  
43  
44  
45  
46  
47  
48  
49  
50  
51  
52  
53  
54  
55  
56  
57  
58  
59  
60

Figure 3 – The EBM Triad and Primary Themes of Approaches to Values Integration

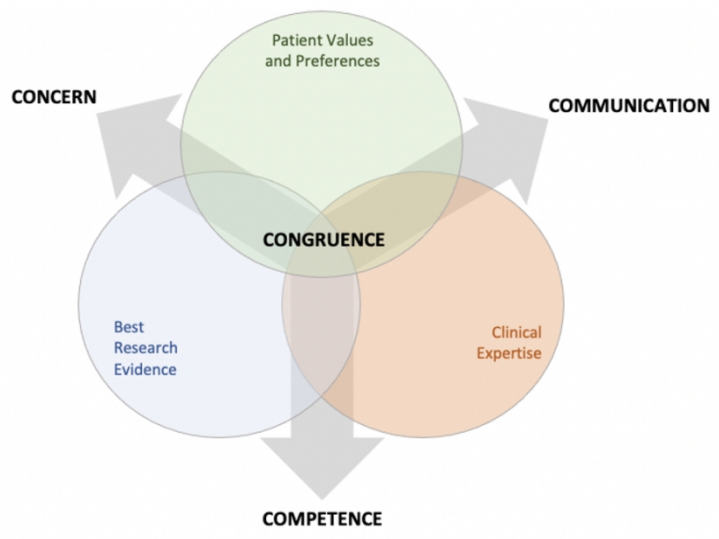

Figure 3 – The EBM Triad and Primary Themes of Approaches to Values Integration

225x156mm (144 x 144 DPI)

## SUPPLEMENTAL MATERIALS

### Appendix A – Protocol Registration, 11 May 2020

No. [CRD42020166002](https://www.crd.york.ac.uk/prospero/display_record.php?RecordID=166002) – [https://www.crd.york.ac.uk/prospero/display\\_record.php?RecordID=166002](https://www.crd.york.ac.uk/prospero/display_record.php?RecordID=166002)

**NIHR** | National Institute  
for Health Research

**PROSPERO**  
International prospective register of systematic reviews

To enable PROSPERO to focus on COVID-19 submissions, this registration record has undergone basic automated checks for eligibility and is published exactly as submitted. PROSPERO has never provided peer review, and usual checking by the PROSPERO team does not endorse content. Therefore, automatically published records should be treated as any other PROSPERO registration. Further detail is provided [here](#).

#### Citation

Michael Tringale, Genia Stephen, Carl Heneghan, Anne-Marie Boylan. Incorporating patient values and preferences in health care for adults with noncommunicable diseases: A systematic review of qualitative evidence.. PROSPERO 2020 CRD42020166002 Available from: [https://www.crd.york.ac.uk/prospero/display\\_record.php?ID=CRD42020166002](https://www.crd.york.ac.uk/prospero/display_record.php?ID=CRD42020166002)

#### Review question

What are the approaches, barriers, and facilitators that practicing health care professionals (HCPs) experience regarding the integration of patient values and preferences in primary and secondary care for adults with noncommunicable diseases (NCDs)?

#### Searches

This review is concerned with identifying studies regarding HCPs and their experiences incorporating patient values and preferences into their evidence based care (Sackett 1996). Reviewers will use the Joanna Briggs Institute (JBI) search method (Aromataris and Munn 2017) with terms adapted from an initial scoping of electronic databases MEDLINE and CINAHL with an analysis of text from titles, abstracts, and index terms used to describe references. Then, full systematic literature searches will be tailored and conducted for 12 databases including ASSIA, CINAHL, DARE, EMBASE, ERIC, Google Scholar, GreyLit, GreyNet, MEDLINE (via Ovid and PubMed), PsycINFO, Scopus and Web of Science.

#### Types of study to be included

This review will consider studies and other evidence with full text available in English that focus on qualitative data including, but not limited to, designs such as phenomenology, grounded theory, ethnography, action research, other interpretive studies, and methods such as interviews, focus groups, and surveys. Also considered will be mixed-methods studies reporting relevant qualitative data or analysis regarding the topic and population of interest. This review is concerned with current relevant practice so only studies from the year 2000 or later will be included.

#### Condition or domain being studied

This review will consider studies involving care for adults in the four major NCD groups: cancers, cardiovascular diseases, diabetes, and chronic respiratory diseases (WHO 2020).

#### Participants/population

The population of interest is practicing HCPs in primary and secondary care. To the extent that some studies of patient populations may also include relevant HCP data, these studies may be included but only the HCP perspectives will be extracted.

#### Intervention(s), exposure(s)

The population of interest is practicing HCPs in primary and secondary care. To the extent that some studies of patient populations may also include relevant HCP data, these studies may be included but only the HCP perspectives will be extracted.

#### Comparator(s)/control

None

#### Context

This review will consider evidence from non-emergency and non-inpatient settings where clinicians provide primary or secondary care for adults with NCDs.

### Main outcome(s)

- Approaches to integrating patient values and preferences into clinical care.
- Barriers to integrating patient values and preferences into clinical care.
- Facilitators to integrating patient values and preferences into clinical care.
- Thematic analysis, interpretation, and insights.

### Measures of effect

Main outcomes will be presented as qualitative data such as verbatims from, and interpretations of, included studies, as well as an author synthesis and interpretation of the qualitative evidence reviewed.

### Additional outcome(s)

- Practice recommendations for integration of patient values and preferences into evidence based care.
- Further research recommendations.

### Measures of effect

Additional outcomes will be presented as recommendations by the author.

### Data extraction (selection and coding)

Prospective studies will be saved in RefWorks for cataloging and reference management, imported to EPPI Reviewer for screening, and uploaded to NVivo for data extraction and coding. The primary author will screen titles and abstracts for inclusion, with double-screening of a random sample by a secondary reviewer (Taylor-Phillips et al, 2017), with disagreement resolved by discussion or with a third reviewer/advisor. A full text screening will be performed to identify references for final inclusion.

Qualitative data will be extracted from included references using a modified version of the JBI Data Extraction Tool (Aromataris and Munn 2017) to include specific details about the population, context, study methods, the phenomena of interest relevant to the review question. Data will be synthesized using a meta-aggregation approach and a narrative synthesis. Where textual pooling is not possible, findings will be presented in narrative form.

### Risk of bias (quality) assessment

In addition to double-screening references, quality appraisal will be performed by the primary author using the JBI Critical Appraisal Checklist for Qualitative Research (Aromataris and Munn 2017) with a random sample assed by the second reviewer with disagreement resolved by discussion or with a third reviewer/advisor. The CONQual approach (Munn et al, 2014) will also be used wherein an overall ranking will be assigned to rate the confidence of any synthesized qualitative findings which will be presented in a summary of findings table describing the dependability and credibility of each finding.

### Strategy for data synthesis

The data will be analyzed using meta-aggregation and thematic synthesis. Qualitative research findings will be pooled using the coding and synthesis strategies and tools enabled by NVivo including further collection and synthesis of findings to generate a set of statements that represent the aggregation, organization, and categorization of the findings based on similarity in meaning. These categories will then be subjected to further synthesis to produce a single comprehensive set of findings that can be used as the basis for analysis, interpretation, reporting, and recommendations.

### Analysis of subgroups or subsets

Data related to different contexts such as disease severities, prognoses, multimorbidities, and/or HCP types, to the extent that such data will be available in the included studies, may be analyzed as subgroups.

### Contact details for further information

Michael Tringale  
MikeTringale@gmail.com

**Organisational affiliation of the review**

University of Oxford  
[www.ox.ac.uk](http://www.ox.ac.uk)

**Review team members and their organisational affiliations**

Michael Tringale. University of Oxford  
Genia Stephen. University of Oxford  
Dr Carl Heneghan. University of Oxford  
Dr Anne-Marie Boylan. University of Oxford

**Type and method of review**

Narrative synthesis, Synthesis of qualitative studies, Systematic review, Other

**Anticipated or actual start date**

01 February 2020

**Anticipated completion date**

01 December 2020

**Funding sources/sponsors**

Self-funded with a Research Support Grant from Kellogg College, University of Oxford

**Conflicts of interest****Language**

English

**Country**

United States of America

**Stage of review [1 change]**

Review Completed published

**Details of final report/publication(s) or preprints if available [1 change]**

Pre-reviewed, pre-graded, pre-published summary of results and conclusions includes:

Results: From 3331 potential records, 35 met inclusion criteria. Findings comprised: 146 approaches to incorporating patient values and preferences grouped into 18 main themes with 12 subthemes; 92 barriers grouped into 4 main themes with 13 subthemes; 46 facilitators grouped into 5 main themes with 8 subthemes; and, 52 epistemologies related to incorporating patient values and preferences. Four primary concepts summarize all of these findings: Concern, Competence, Communication, and Congruence.

Conclusions: HCPs incorporate patient values and preferences into health care through actions of Concern, Competence, Communication, and Congruence, and there are numerous philosophies that influence how HCPs regard and approach patient values and preferences. HCPs face a number of barriers to incorporating patient values and preferences but they are also facilitated by several factors.

**Subject index terms status**

Subject indexing assigned by CRD

**Subject index terms**

MeSH headings have not been applied to this record

**Date of registration in PROSPERO**

05 July 2020

**Date of first submission**

11 May 2020

Stage of review at time of this submission [2 changes]

| Stage                                                           | Started | Completed |
|-----------------------------------------------------------------|---------|-----------|
| Preliminary searches                                            | Yes     | No        |
| Piloting of the study selection process                         | Yes     | No        |
| Formal screening of search results against eligibility criteria | No      | No        |
| Data extraction                                                 | No      | No        |
| Risk of bias (quality) assessment                               | No      | No        |
| Data analysis                                                   | No      | No        |

*The record owner confirms that the information they have supplied for this submission is accurate and complete and they understand that deliberate provision of inaccurate information or omission of data may be construed as scientific misconduct.*

*The record owner confirms that they will update the status of the review when it is completed and will add publication details in due course.*

Versions

05 July 2020  
18 November 2020  
29 November 2020

## Appendix B – Search Strategy Details

NOTE: Unless otherwise stated, all searches were limited to publication dates 2000 to 2020, English language only. Standard “MeSH” terms ([Medial Subject Headings](#)) established by the National Library of Medicine for use with Medline and other databases were of some use for this review’s search. Main MeSH headings of interest included:

- Communication
- Communication Barrier/s
- Communication Method/s
- Consumer Preference/s
- Decision-Making, Shared
- Evidence-Based Medicine
- Evidence-Based Nursing
- Evidence-Based Practice
- Health Communication
- Implementation Science
- Patient Advocacy
- Patient-Centered Care
- Patient Preference/s
- Patient Participation
- Physician-Patient Relation/s (Relationship/s)
- Professional-Patient Relations

---

### EMBASE – Excerpta Medica DataBASE

<https://www.elsevier.com/solutions/embase-biomedical-research>

(January 2000 to May 2020) 1031 studies identified

*Primary keywords and search string in “advanced search” tool; preselect English only, titles, abstracts and indexed terms:*

1. ((physician\* OR "health professional\*" OR "healthcare professional\*" OR "health care professional\*" OR practitioner\* OR specialist\* OR doctor\* OR nurse\* OR provider\* OR "clinician\*" OR "clinic\* staff") ADJ10 (perspective\* OR attitude\* OR opinion\* OR behavior\* OR behaviour\* OR practices))
2. (integrat\* OR implement\* OR incorporat\* OR consider\* OR promote\* OR use\* OR using OR approach\* OR barrier\* OR facilitate\* OR regard\*) AND ((patient\* OR client\* OR individual\* OR consumer\*) ADJ5 (values OR preferences))
3. (qualitative OR review OR synthesis OR analysis OR narrative OR interview\* OR observation\* OR survey\* OR "focus group\*")
4. (patient NOT (palliative OR "end of life" "end-of-life" OR "advanced directive\*" OR child OR surge\* OR emergenc\* OR resuscitat\* OR terminal\*))
5. 1 and 2 and 3 and 4

### PubMed-Medline

<http://www.pubmed.com/>

(January 2000 to May 2020) 661 studies identified

*Primary keywords and search string in “advanced” search tool; preselect English only, titles, abstracts and indexed terms:*



(((((((((((("physician\*" [Title] OR "health professional\*" [Title]) OR "healthcare professional\*" [Title]) OR "health care professional\*" [Title]) OR "practitioner\*" [Title]) OR "specialist\*" [Title]) OR "doctor\*" [Title]) OR "nurse\*" [Title]) OR "provider\*" [Title]) OR "clinician\*" [Title]) OR ("clinic\*" [All Fields] AND ("staff" [All Fields] OR "staff s" [All Fields]) OR "staffs" [All Fields]))) AND (((("perspective\*" [Title] OR "attitude\*" [Title] OR "opinion\*" [Title] OR "behavior\*" [Title] OR "behaviour\*" [Title] OR (((((((((((("practicability" [All Fields] OR "practicable" [All Fields]) OR "practical" [All Fields]) OR "practicalities" [All Fields]) OR "practicality" [All Fields]) OR "practically" [All Fields]) OR "practicals" [All Fields]) OR "practice" [All Fields]) OR "practice s" [All Fields]) OR "practiced" [All Fields]) OR "practices" [All Fields]) OR "practicing" [All Fields]))) AND (((((((("qualitative" [Title] OR "review" [Title] OR "synthesis" [Title] OR "analysis" [Title] OR "narrative" [Title] OR "interview\*" [Title] OR "observation\*" [Title] OR "survey\*" [Title] OR "focus group\*" [All Fields])) AND (((("patient\*" [Title] OR "client\*" [Title] OR "individual\*" [Title] OR "consumer\*" [All Fields]) AND ("values" [Title] OR (((((((("prefer" [All Fields] OR "preferable" [All Fields]) OR "preferably" [All Fields]) OR "preferred" [All Fields]) OR "preference" [All Fields]) OR "preferences" [All Fields]) OR "preferred" [All Fields]) OR "preferring" [All Fields]) OR "prefers" [All Fields])))

### Scopus

<https://www.elsevier.com/solutions/scopus>

(January 2000 to July 2020) 627 studies identified

*Primary keywords and search string: (NOTE: 147,000 results originally from this string; Scopus provides pre-set search inclusion/exclusion options to choose. To narrow this search I selected publication year range 2000-2020; included only Med, Nursing, Health Professions; only USA, UK, CAN, and the 4 primary NCDs of interested to this study, Oncology, CV, Respiratory, Diabetes.)*

("primary care" OR "specialist care" OR "secondary care") AND (diabetes OR asthma OR cardiovascular OR cancer OR COPD) AND (((((((physician\* OR "health professional\*" OR "healthcare professional\*" OR "health care professional\*" OR practitioner\* OR specialist\* OR doctor\* OR nurse\* OR provider\* OR "clinician\*" OR "clinic\* staff") W/10 (perspective\* OR attitude\* OR opinion\* OR behavior\* OR behaviour\* OR practices)) AND ((integrat\* OR implement\* OR incorporat\* OR consider\* OR promote\* OR use\* OR using OR approach\* OR barrier\* OR facilitate\* OR regard\*) AND ((patient\* OR client\* OR individual\* OR consumer\*) W/5 (values OR preferences)))) AND (qualitative OR review OR synthesis OR analysis OR narrative OR interview\* OR observation\* OR survey\* OR "focus group\*")) AND NOT ("patient-reported" OR "advance planning" OR palliative OR "end of life" "end-of-life" OR "advanced directive\*" OR child OR children OR pediatric OR teen\* OR adolescent\* OR surge\* OR emergenc\* OR resuscitat\* OR terminal\*) AND NOT (patient W/3 (perspective\* OR attitude\* OR opinion\* OR behavior\* OR behavior\* OR understanding OR awareness OR education OR satisfaction))

### OVID-Medline

<https://www.ovid.com/product-details.901.html>

(January 2000 to May 2020) 583 studies identified

*Primary keywords and search string in "advanced search" tool; preselect English only, titles, abstracts and indexed terms:*

1. ((physician\* OR "health professional\*" OR "healthcare professional\*" OR "health care professional\*" OR practitioner\* OR specialist\* OR doctor\* OR nurse\* OR provider\* OR "clinician\*" OR "clinic\* staff") ADJ10 (perspective\* OR attitude\* OR opinion\* OR behavior\* OR behavior\* OR practices))

2. (integrat\* OR implement\* OR incorporat\* OR consider\* OR promote\* OR use\* OR using OR approach\* OR barrier\* OR facilitate\* OR regard\*) AND ((patient\* OR client\* OR individual\* OR consumer\*) ADJ5 (values OR preferences))
3. (qualitative OR review OR synthesis OR analysis OR narrative OR interview\* OR observation\* OR survey\* OR "focus group\*")
4. (patient NOT (palliative OR "end of life" "end-of-life" OR "advanced directive\*" OR child OR surge\* OR emergenc\* OR resuscitat\* OR terminal\*))
5. 1 and 2 and 3 and 4

### CINAHL – Cumulative Index to Nursing and Allied Health Literature

<https://www.ebscohost.com/nursing/products/cinahl-databases/the-cinahl-database>

(January 2000 to July 2020) 464 studies identified after duplicates removed)

*Primary keywords and search string; titles and abstracts:*

((qualitative OR review OR synthesis OR analysis OR narrative OR interview\* OR observation\* OR survey\* OR "focus group\*") AND (physician\* OR "health professional\*" OR "healthcare professional\*" OR "health care professional\*" OR practitioner\* OR specialist\* OR doctor\* OR nurse\* OR provider\* OR "clinician\*" OR "clinic\* staff") AND (perspective\* OR attitude\* OR opinion\* OR behavior\* OR behavior\* OR practices\*) AND (integrat\* OR implement\* OR incorporat\* OR consider\* OR promote\* OR use\* OR using OR approach\* OR barrier\* OR facilitate\* OR regard\*) AND ("patient\* values" OR "patient\* preferences" OR "client\* values" OR "client\* preferences" OR "individual\* values" OR "individual\* preferences" OR "consumer\* values" OR "consumer\* preferences")) NOT (palliative OR "end of life" OR "end-of-life" OR "advanced directive\*" OR child OR surge\* OR emergenc\* OR resuscitat\* OR terminal\*))

### ASSIA – Applied Social Science Index and Abstracts

[https://search.proquest.com/assia?\\_ga=2.36367776.1827441237.1546299943-1531284045.1543164998](https://search.proquest.com/assia?_ga=2.36367776.1827441237.1546299943-1531284045.1543164998)

(January 2000 to July 2020) 407 studies identified

*Primary keywords and search string:*

(ab(((patient NEAR/2 (values OR preferences))) AND ((physician OR doctor OR provider) NEAR/5 (practices OR perspectives OR attitudes OR opinions))) AND qualitative) OR ti((patient AND (values OR preferences)) AND (physician OR doctor OR provider)) OR ti(patient values) OR ((((((physician OR "health professional" OR "healthcare professional" OR "health care professional" OR practitioner OR specialist OR doctor OR nurse OR provider OR "clinician" OR staff) NEAR/10 (perspectives OR attitudes OR opinions OR behavior OR behaviour OR practices)) AND ((integrate OR implement OR incorporate OR consider OR promote OR approaches OR barriers OR facilitate OR facilitators) NEAR/5 ((patient OR client OR individual OR consumer) NEAR/3 (values OR preferences)))) AND (qualitative OR review OR synthesis OR analysis OR narrative OR interviews OR observations OR survey OR "focus groups")) NOT (palliative OR "end of life" "end-of-life" OR "advanced directives" OR child OR surgery OR emergency OR resuscitation OR terminal)) AND pd(20000101-20200630))

### PsychINFO

<https://www.apa.org/pubs/databases/psycinfo/index.aspx>

(January 2000 to July 2020) 255 studies identified

*Primary keywords and search string using "advanced search" tool; limited to abstracts:*

1. ((physician\* OR "health professional\*" OR "healthcare professional\*" OR "health care professional\*" OR practitioner\* OR specialist\* OR doctor\* OR nurse\* OR provider\* OR "clinician\*" OR "clinic\* staff") ADJ10 (perspective\* OR attitude\* OR opinion\* OR behavior\* OR behaviour\* OR practices))
2. (integrat\* OR implement\* OR incorporat\* OR consider\* OR promote\* OR use\* OR using OR approach\* OR barrier\* OR facilitate\* OR regard\*) AND ((patient\* OR client\* OR individual\* OR consumer\*) ADJ5 (values OR preferences))
3. (qualitative OR review OR synthesis OR analysis OR narrative OR interview\* OR observation\* OR survey\* OR "focus group\*")
4. (patient NOT (palliative OR "end of life" "end-of-life" OR "advanced directive\*" OR child OR surge\* OR emergenc\* OR resuscitat\* OR terminal\*))
5. 1 and 2 and 3 and 4

### Web of Science

<http://apps.webofknowledge.com/>

(January 2000 to July 2020) 231 studies identified

#### Primary keywords and search string:

((physician\* OR "health professional\*" OR "healthcare professional\*" OR "health care professional\*" OR practitioner\* OR specialist\* OR doctor\* OR nurse\* OR provider\* OR "clinician\*" OR "clinic\* staff") NEAR/10 (perspective\* OR attitude\* OR opinion\* OR behavior\* OR behavior\* OR practices)) AND ((integrat\* OR implement\* OR incorporat\* OR consider\* OR promote\* OR use\* OR using OR approach\* OR barrier\* OR facilitate\* OR regard\*) NEAR/5 ((patient\* OR client\* OR individual\* OR consumer\*) NEAR/3 (values OR preferences))) AND (qualitative OR review OR synthesis OR analysis OR narrative OR interview\* OR observation\* OR survey\* OR "focus group\*") NOT (palliative OR "end of life" "end-of-life" OR "advanced directive\*" OR child OR surge\* OR emergenc\* OR resuscitat\* OR terminal\*)

### Google Scholar

<https://scholar.google.com/>

(January 2000 to April 2020) 95 studies identified

#### Primary keywords and search strategy:

- Screened for “qualitative” and/or “review”
- Exact phrases "patient values" and/or "patient preferences"
- Must include “physician” “health professional” “doctor” “nurse” or variants
- Also included anything re. various types of cancers or "patient/physician communication & relationship" or "joint/shared decision-making" etc.
- Excluded "end of life" "terminal" "end stage" "directives" "advanced care planning" arthritis, fibromyalgia (non-top NCDs) or resuscitation

### DARE – Database of Abstracts of Reviews for Effectiveness

<https://www.crd.york.ac.uk/CRDWeb/>

(January 2000 to July 2020) 19 studies identified

#### Primary keywords and search string; select DARE database only; publication year 2000 to 2020; search titles only:

((qualitative OR review OR synthesis OR analysis OR narrative OR interview\* OR observation\* OR survey\* OR "focus group\*") AND (physician\* OR "health professional\*" OR "healthcare

1  
2  
3 professional\*" OR "health care professional\*" OR practitioner\* OR specialist\* OR doctor\* OR  
4 nurse\* OR provider\* OR "clinician\*" OR "clinic\* staff") AND (perspective\* OR attitude\* OR  
5 opinion\* OR behavior\* OR behavior\*)  
6  
7

#### 8 **ERIC – Education Resources Information Center**

9 <https://eric.ed.gov/>

10 (January 2000 to July 2020) 7 studies identified  
11

12 *Primary keywords and search string; full text available only:*  
13

14 ("patients values" OR "patients preferences")  
15  
16

#### 17 **GreyLit**

18 <http://greylit.org/>

19 (2000 to 2020) 1 study identified  
20

21 *Primary keywords and search string (note this database was discontinued in 2017, but remains*  
22 *searchable up to that date):*  
23

24 "patients preferences" (6 results) narrowed with additional keyword "values"  
25  
26

#### 27 **Forward-Backward Searches**

28 (January 2000 to August 2020) 86 studies identified  
29  
30  
31  
32  
33  
34  
35  
36  
37  
38  
39  
40  
41  
42  
43  
44  
45  
46  
47  
48  
49  
50  
51  
52  
53  
54  
55  
56  
57  
58  
59  
60

## Appendix C – Appraisal Checklist & Quality Assessment of Included Records

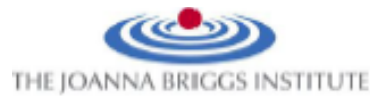

### JBI Critical Appraisal Checklist for Qualitative Research

Reviewer \_\_\_\_\_ Date \_\_\_\_\_

Author \_\_\_\_\_ Year \_\_\_\_\_ Record Number \_\_\_\_\_

|                                                                                                                                                    | Yes                      | No                       | Unclear                  | Not applicable           |
|----------------------------------------------------------------------------------------------------------------------------------------------------|--------------------------|--------------------------|--------------------------|--------------------------|
| 1. Is there congruity between the stated philosophical perspective and the research methodology?                                                   | <input type="checkbox"/> | <input type="checkbox"/> | <input type="checkbox"/> | <input type="checkbox"/> |
| 2. Is there congruity between the research methodology and the research question or objectives?                                                    | <input type="checkbox"/> | <input type="checkbox"/> | <input type="checkbox"/> | <input type="checkbox"/> |
| 3. Is there congruity between the research methodology and the methods used to collect data?                                                       | <input type="checkbox"/> | <input type="checkbox"/> | <input type="checkbox"/> | <input type="checkbox"/> |
| 4. Is there congruity between the research methodology and the representation and analysis of data?                                                | <input type="checkbox"/> | <input type="checkbox"/> | <input type="checkbox"/> | <input type="checkbox"/> |
| 5. Is there congruity between the research methodology and the interpretation of results?                                                          | <input type="checkbox"/> | <input type="checkbox"/> | <input type="checkbox"/> | <input type="checkbox"/> |
| 6. Is there a statement locating the researcher culturally or theoretically?                                                                       | <input type="checkbox"/> | <input type="checkbox"/> | <input type="checkbox"/> | <input type="checkbox"/> |
| 7. Is the influence of the researcher on the research, and vice-versa, addressed?                                                                  | <input type="checkbox"/> | <input type="checkbox"/> | <input type="checkbox"/> | <input type="checkbox"/> |
| 8. Are participants, and their voices, adequately represented?                                                                                     | <input type="checkbox"/> | <input type="checkbox"/> | <input type="checkbox"/> | <input type="checkbox"/> |
| 9. Is the research ethical according to current criteria or, for recent studies, and is there evidence of ethical approval by an appropriate body? | <input type="checkbox"/> | <input type="checkbox"/> | <input type="checkbox"/> | <input type="checkbox"/> |
| 10. Do the conclusions drawn in the research report flow from the analysis, or interpretation, of the data?                                        | <input type="checkbox"/> | <input type="checkbox"/> | <input type="checkbox"/> | <input type="checkbox"/> |

Quality Assessment of Included Records

**Key to JBI Critical Appraisal Checklist for Qualitative Research**

|         |                                                                                                                |
|---------|----------------------------------------------------------------------------------------------------------------|
| JBI-Q1  | Is there congruity between stated philosophical perspective and research methodology?                          |
| JBI-Q2  | Is there congruity between research methodology and research question or objective?                            |
| JBI-Q3  | Is there congruity between the research methodology and the data collection methods?                           |
| JBI-Q4  | Is there congruity between the research methodology and the representation and analysis of data?               |
| JBI-Q5  | Congruity between the research methodology and the interpretation of results.                                  |
| JBI-Q6  | Is there a statement locating the researcher culturally or theoretically?                                      |
| JBI-Q7  | Is the influence of the researcher on the research, and vice-versa, addressed?                                 |
| JBI-Q8  | Are participants voices adequately represented?                                                                |
| JBI-Q9  | Is the research ethical according to current criteria, or evidence of ethical approval by an appropriate body? |
| JBI-Q10 | Do the conclusions flow from the analysis, or interpretation, of the data?                                     |

| Author (Year)              | Ref. | JBI-Q1 | JBI-Q2 | JBI-Q3 | JBI-Q4 | JBI-Q5 | JBI-Q6 | JBI-Q7 | JBI-Q8 | JBI-Q9 | JBI-Q10 |
|----------------------------|------|--------|--------|--------|--------|--------|--------|--------|--------|--------|---------|
| Aita V et al. (2005)       | 36   | Yes    | Yes    | Yes    | Yes    | Yes    | Yes    | No     | Yes    | Yes    | Yes     |
| Chhabra KR et al. (2012)   | 37   | Yes    | Yes    | Yes    | Yes    | Yes    | No     | No     | Yes    | Yes    | Yes     |
| Davis K et al. (2017)      | 38   | Yes    | Yes    | Yes    | Yes    | Yes    | No     | No     | Yes    | Yes    | Yes     |
| Elwyn G et al. (2000)      | 39   | Yes    | Yes    | Yes    | Yes    | Yes    | No     | No     | Yes    | Yes    | Yes     |
| Feiring E et al. (2020)    | 40   | Yes    | Yes    | Yes    | Yes    | Yes    | No     | No     | Yes    | Yes    | Yes     |
| Ford S et al. (2002)       | 32   | Yes    | Yes    | Yes    | Yes    | Yes    | No     | No     | Yes    | Yes    | Yes     |
| Ford S et al. (2003)       | 31   | Yes    | Yes    | Yes    | Yes    | Yes    | No     | No     | Yes    | yes    | Yes     |
| Ford S et al. (2006)       | 41   | Yes    | Yes    | Yes    | Yes    | Yes    | No     | No     | No     | Yes    | Yes     |
| Friedberg MW et al. (2013) | 42   | Yes    | Yes    | Yes    | Yes    | Yes    | Yes    | No     | Yes    | Yes    | Yes     |
| Golden SE et al. (2017)    | 43   | Yes     |
| Gruß I et al. (2019)       | 44   | Yes    | Yes    | Yes    | Yes    | Yes    | Yes    | No     | Yes    | Yes    | Yes     |
| Hall J et al. (2011)       | 45   | Yes    | Yes    | Yes    | Yes    | Yes    | No     | No     | No     | N/A    | Yes     |
| Hart PL et al. (2014)      | 46   | Yes     |
| Hisham R et al. (2016)     | 47   | Yes     |
| Jefford M et al. (2002)    | 48   | Yes    | Yes    | Yes    | Yes    | Yes    | No     | No     | No     | N/A    | Yes     |
| Kennedy BM et al. (2017)   | 49   | Yes     |
| Landmark AM et al. (2016)  | 50   | Yes    | Yes    | Yes    | Yes    | Yes    | No     | No     | Yes    | Yes    | Yes     |
| Lown B et al. (2009)       | 51   | Yes    | Yes    | Yes    | Yes    | Yes    | No     | No     | Yes    | Yes    | Yes     |
| McLeod H et al. (2017)     | 33   | Yes     |
| Murdoch J et al. (2020)    | 52   | Yes    | Yes    | Yes    | Yes    | Yes    | No     | No     | Yes    | Yes    | Yes     |
| Paiva D et al. (2019)      | 53   | Yes    | Yes    | Yes    | Yes    | Yes    | No     | No     | Yes    | Yes    | Yes     |
| Pieterse AH et al. (2011)  | 54   | Yes    | Yes    | Yes    | Yes    | Yes    | No     | No     | Yes    | Yes    | Yes     |

| Author (Year)                   | Ref. | JBI-Q1 | JBI-Q2 | JBI-Q3 | JBI-Q4 | JBI-Q5 | JBI-Q6 | JBI-Q7 | JBI-Q8 | JBI-Q9 | JBI-Q10 |
|---------------------------------|------|--------|--------|--------|--------|--------|--------|--------|--------|--------|---------|
| Salter C et al. (2019)          | 55   | Yes    | Yes    | Yes    | Yes    | Yes    | No     | No     | Yes    | Yes    | Yes     |
| Schulman-Green DJ et al. (2006) | 56   | Yes    | Yes    | Yes    | Yes    | Yes    | No     | No     | Yes    | Yes    | Yes     |
| Shepherd HL et al. (2011)       | 57   | Yes    | Yes    | Yes    | Yes    | Yes    | Yes    | No     | Yes    | Yes    | Yes     |
| Shortus T et al. (2011)         | 58   | Yes     |
| Tracy CS et al. (2003)          | 59   | Yes    | Yes    | Yes    | Yes    | Yes    | No     | Yes    | Yes    | Yes    | Yes     |
| Van Humbeeck et al. (2020)      | 60   | Yes    | Yes    | Yes    | Yes    | Yes    | No     | No     | Yes    | Yes    | Yes     |
| Vermunt N et al. (2019)         | 61   | Yes     |
| Visser LNC et al. (2018)        | 62   | Yes    | Yes    | Yes    | Yes    | Yes    | No     | No     | Yes    | Yes    | Yes     |
| Zulman DM et al. (2020)         | 63   | Yes     |

## Appendix D – Data Extraction Tool

Modified version of the JBI Data Extraction Tool

| Item to be Extracted                                 | Data |
|------------------------------------------------------|------|
| Study ID                                             |      |
| Publication Year                                     |      |
| Title                                                |      |
| Publication                                          |      |
| Study Reference in Full                              |      |
| Study Aim/Objective/Phenomena of Interest            |      |
| Qual Methodology                                     |      |
| Qual Method(s)                                       |      |
| Analytical Approach                                  |      |
| HCP Participant Type                                 |      |
| No. HCP Participants                                 |      |
| Level of HCP Experience                              |      |
| Setting (Clinical Context)                           |      |
| Location (Geography)                                 |      |
| No. Practices/Sites/Clinics                          |      |
| No. Clinical Consultations, Encounters, Interactions |      |
| NCD Category                                         |      |
| Qual Findings                                        |      |
| Author Conclusions                                   |      |
| Reviewer Comments                                    |      |
| Extraction Completed Date                            |      |



## Appendix E – Findings & Citations: Table of Approaches to Values Integration

| Primary Themes               | Subthemes           | Healthcare Professional Approaches/Behaviors                                    | Citation(s)                                                                                                                                                                                              |
|------------------------------|---------------------|---------------------------------------------------------------------------------|----------------------------------------------------------------------------------------------------------------------------------------------------------------------------------------------------------|
| <b>Approaches of CONCERN</b> | Advocating          | Advocating for the Patient                                                      | <i>Aita, Davis, Elwyn, Ford'02, Ford'03, Lown, Paiva, Tracy</i>                                                                                                                                          |
|                              |                     | Making Referrals, Seeking Second Opinions                                       | <i>Aita, Chhabra, Ford'06, Friedberg, McLeod, Murdoch, Tracy, Visser</i>                                                                                                                                 |
|                              | Caring & Connecting | Acting in a Relational Way                                                      | <i>Aita, Lown, Paiva, Zulman</i>                                                                                                                                                                         |
|                              |                     | Being Genuine/Sincere                                                           | <i>Aita, McLeod, Salter, Shortus, Van Humbeeck, Zulman</i>                                                                                                                                               |
|                              |                     | Comforting/Reassuring/Supporting the Patient                                    | <i>Aita, Feiring, Ford'02, Ford'03, Friedberg, Grub, Hart, Jefford, Kennedy, Landmark, Lown, McLeod, Murdoch, Paiva, Pieterse, Salter, Schulman-Green, Shepherd, Tracy, Van Humbeeck, Visser, Zulman</i> |
|                              |                     | Creating a Safe Space to Talk/Question/Disagree                                 | <i>Chhabra, Elwyn, Feiring, Ford'02, Ford'03, Golden, Grub, Hisham, Jefford, Landmark, Lown, McLeod, Paiva, Pieterse, Salter, Shepherd, Tracy, Van Humbeeck</i>                                          |
|                              |                     | Expressive Touch                                                                | <i>Hall, McLeod, Zulman</i>                                                                                                                                                                              |
|                              |                     | Focus on Prevention                                                             | <i>Aita, Murdoch</i>                                                                                                                                                                                     |
|                              |                     | Making the Patient Feel Comfortable                                             | <i>Ford'02, Lown, McLeod, Visser</i>                                                                                                                                                                     |
|                              |                     | Mindfulness                                                                     | <i>Grub, Lown, McLeod, Zulman</i>                                                                                                                                                                        |
|                              |                     | Seeing Patient Perspective/Having (vs. "showing/exhibiting/displaying") Empathy | <i>Aita, Davis, Elwyn, Ford'03, Friedberg, Golden, Grub, Hall, Kennedy, Landmark, Lown, McLeod, Murdoch, Paiva, Pieterse, Schulman-Green, Van Humbeeck, Vermont, Visser, Zulman</i>                      |
|                              |                     | Sharing Doctor's Own Personal Experiences, Making the Doctor Approachable       | <i>Kennedy, McLeod</i>                                                                                                                                                                                   |

| Primary Themes | Subthemes  | Healthcare Professional Approaches/Behaviors                             | Citation(s)                                                                                           |
|----------------|------------|--------------------------------------------------------------------------|-------------------------------------------------------------------------------------------------------|
|                |            | Sharing Personal Interests, Feelings, Experiences                        | Lown, McLeod                                                                                          |
|                |            | Showing/Exhibiting/Displaying (vs. "having") Compassion, Empathy, Caring | Ford'03, Golden, Grub, Kennedy, Lown, McLeod, Murdoch, Paiva, Van Humbeeck, Visser, Zulman            |
|                |            | Showing Curiosity About the Patient/Condition                            | Hall, Zulman                                                                                          |
|                |            | Treating Patient as a Unique Person/Individual                           | McLeod, Van Humbeeck                                                                                  |
|                |            | Valuing Feeling Comfortable                                              | McLeod, Pieterse, Visser                                                                              |
|                | Empowering | Enabling Patient Self-Management, Patient Agency                         | Chhabra, Feiring, Landmark, McCleod, Murdoch, Paiva, Salter                                           |
|                |            | Establishing Equality                                                    | Elwyn, Ford'03, Lown, McLeod, Murdoch, Van Humbeeck                                                   |
|                |            | Giving Patient Control, Final Say, Patient Empowerment                   | Ford'02 Ford'03, Grub, Kennedy, Lown, McLeod, Murdoch, Salter, Shepherd, Van Humbeeck, Visser, Zulman |
|                |            | Having Patience, Letting the Patient Set the Pace                        | Ford'03, McLeod, Visser                                                                               |
|                |            | Invites Patient to Lead                                                  | McLeod, Salter                                                                                        |
|                |            | Opportunities to Reconsider                                              | Elwyn, Ford'03, Pieterse                                                                              |
|                |            | Recognizing, Confirming, Validating Patient Autonomy                     | Chhabra, Elwyn, Ford'02, Ford'03, Ford'06, Jeffords, Lown, McLeod, Shortus, Van Humbeeck              |
|                |            | Respectful Environments/Clinics/Waiting Rooms                            | Aita, Ford'03, McLeod                                                                                 |
|                |            | Respecting Privacy                                                       | Ford'03, McLeod, Van Humbeeck                                                                         |
|                |            | Sharing Control Overall                                                  | Lown, McLeod                                                                                          |
|                |            | Trusting/Respecting the Patient                                          | Elwyn, Ford'03, Ford'06, Golden, Hart, Kennedy, Lown, McLeod, Paiva, Shortus, Vermunt, Zulman         |
|                |            | Valuing the Individual Patient                                           | Hart, McLeod                                                                                          |
|                | Inviting   | Invite/Involve Carers/Caregivers                                         | Ford'03, Paiva                                                                                        |
|                |            | Invite/Involve Family/Loved Ones                                         | Chhabra, Davis, Elwyn, Friedberg, Golden, Hart, Lown, Paiva, Salter, Van Humbeeck, Visser, Zulman     |
|                |            | Invite/Involve Others                                                    | Elwyn                                                                                                 |

| Primary Themes                  | Subthemes       |                  | Healthcare Professional Approaches/Behaviors         | Citation(s)                                                                                                                              |
|---------------------------------|-----------------|------------------|------------------------------------------------------|------------------------------------------------------------------------------------------------------------------------------------------|
|                                 |                 |                  | Seeks Input from Colleagues and Other Experts        | <i>Elwyn, Hisham</i>                                                                                                                     |
|                                 | Listening       |                  | Active Listening, Without Interruption               | <i>Elwyn, Ford'03, Ford'06, Hall, Landmark, Lown, McLeod, Paiva, Salter, Zulman</i>                                                      |
|                                 |                 |                  | Silence, Attentive or As a Response to Emotion       | <i>Visser, Zulman</i>                                                                                                                    |
|                                 | Partnering      |                  | Develop Partnership with the Patient                 | <i>Aita, Elwyn, Kennedy, McLeod, Zulman</i>                                                                                              |
|                                 |                 |                  | Forms Therapeutic Alliance/Relationship with Patient | <i>McLeod, Paiva</i>                                                                                                                     |
|                                 |                 |                  | Mutual Respect Between Patient and HCP               | <i>Elwyn, Ford'03, McLeod, Paiva, Vermont</i>                                                                                            |
|                                 |                 |                  | Personalizing Approach/Decisions/Care                | <i>Chhabra, Feiring, Friedberg, Jefford, McLeod, Murdoch, Paiva, Salter, Shortus, Van Humbeeck, Zulman</i>                               |
|                                 |                 |                  | Takes the Long-Term View                             | <i>Davis, Golden, Murdoch, Schulman-Green, Shortus</i>                                                                                   |
|                                 |                 |                  | Understanding the Patient                            | <i>Davis, Elwyn, Feiring, Ford'03, Ford'06, McLeod, Friedberg, Golden, Kennedy, Landmark, Lown, Salter, Van Humbeeck, Visser, Zulman</i> |
|                                 | Sensing         |                  | Cultural Sensitivity                                 | <i>Aita, Hart, Kennedy, Lown, McLeod, Shepherd,</i>                                                                                      |
|                                 |                 |                  | Interpersonal Sensitivity, Overall Concern           | <i>Ford'03, Hall, McLeod, Paiva, Pieterse, Zulman</i>                                                                                    |
|                                 |                 |                  | Non-Judgmental                                       | <i>Lown</i>                                                                                                                              |
|                                 |                 |                  | Respect/Include Religion                             | <i>McLeod, Van Humbeeck</i>                                                                                                              |
|                                 |                 |                  | Using Intuition                                      | <i>Tracy</i>                                                                                                                             |
| <b>Approaches of COMPETENCE</b> | Decision Making | Decision Support | Patient Decision Aids/Tools                          | <i>Davis, Ford'03, Friedberg, Grub, Jefford, Lown, McLeod, Shortus, Vermont</i>                                                          |
|                                 |                 |                  | Stories, Vivid Descriptions                          | <i>Aita, Ford'03, Landmark, Lown, McLeod, Paiva</i>                                                                                      |
|                                 |                 | Directing        | Giving an Opinion to the Patient                     | <i>Ford'03, Ford'06, Landmark, Lown, McLeod, Tracy</i>                                                                                   |
|                                 |                 |                  | Listing                                              | <i>Elwyn, Salter</i>                                                                                                                     |
|                                 |                 |                  | Making Recommendations                               | <i>Aita, Chhabra, Davis, Feiring, Ford'03, Friedberg, Golden,</i>                                                                        |

| Primary Themes | Subthemes |                   | Healthcare Professional Approaches/Behaviors | Citation(s)                                                                                                                                                                                                                  |
|----------------|-----------|-------------------|----------------------------------------------|------------------------------------------------------------------------------------------------------------------------------------------------------------------------------------------------------------------------------|
|                |           |                   |                                              | Kennedy, Landmark, McLeod, Murdoch, Paiva, Pieterse, Schulman-Green, Shepherd, Shortus, Tracy, Vermunt                                                                                                                       |
|                |           | Sharing Decisions | Competence with Research Evidence            | Elwyn, Ford'02, Ford'06, McLeod                                                                                                                                                                                              |
|                |           |                   | Formulating the Patient's Stance/Priorities  | Grub, Landmark, Murdoch                                                                                                                                                                                                      |
|                |           |                   | Negotiate Decisions                          | Aita, Elwyn, Ford'03, Hall, Landmark, Lown, McLeod, Murdoch, Paiva, Salter, Shepherd, Shortus, Tracy, Vermunt                                                                                                                |
|                |           |                   | Shared Decision-Making (SDM)                 | Chhabra, Davis, Elwyn, Ford'02, Ford'03, Ford'06, Friedberg, Golden, Grub, Hall, Jefford, Landmark, Lown, McLeod, Murdoch, Paiva, Pieterse, Salter, Schulman-Green, Shepherd, Shortus, Van Humbeeck, Vermunt, Visser, Zulman |
|                |           |                   | Understanding Diseases/Treatments            | Ford'03, Davis, Elwyn, Feiring, Golden, Grub, Kennedy, McLeod                                                                                                                                                                |
|                |           | Agenda Setting    | Mutual Agenda Setting                        | Ford'06, McLeod, Murdoch, Salter, Shortus, Zulman                                                                                                                                                                            |
|                |           |                   | Mutually Set Priorities                      | Aita, Lown, McLeod, Murdoch, Salter, Shortus, Vermunt, Zulman                                                                                                                                                                |
|                |           |                   |                                              |                                                                                                                                                                                                                              |
|                |           | Emotions          | Anxiety (Prevent, Recognize or Reduce)       | Chhabra, Davis, Elwyn, Feiring, Ford'03, Golden, Hall, Jefford, Landmark, Salter, Shepherd, Tracy, Visser, Zulman                                                                                                            |
|                |           |                   | Distress Management                          | Chhabra, Golden, Hall, Jefford, Kennedy, McLeod, Paiva, Visser, Zulman                                                                                                                                                       |
|                |           |                   | Processing Emotions                          | Hall, Landmark, Lown, McLeod, Paiva, Visser, Zulman                                                                                                                                                                          |
|                |           | Negotiating       |                                              | Assess, Evaluate Treatment Options                                                                                                                                                                                           |

| Primary Themes | Subthemes            | Healthcare Professional Approaches/Behaviors        | Citation(s)                                                                                                                      |
|----------------|----------------------|-----------------------------------------------------|----------------------------------------------------------------------------------------------------------------------------------|
|                |                      |                                                     | <i>Salter, Shepherd, Vermont</i>                                                                                                 |
|                |                      | Deliberate, Weigh, Negotiate Options                | <i>Davis, Elwyn, Ford'03, Friedberg, Golden, Grub, Landmark, McLeod, Pieterse, Shepherd</i>                                      |
|                |                      | Contesting Patient Understanding/Responses          | <i>Murdoch, Pieterse, Salter</i>                                                                                                 |
|                |                      | Discuss Pros/Cons of Options                        | <i>Chhabra, McLeod, Shepherd, Van Humbeeck, Vermont</i>                                                                          |
|                |                      | Giving, Outlining, Providing Options                | <i>Davis, Chhabra, Elwyn, Ford'02, Ford'03, Friedberg, Golden, Grub, Jefford, McLeod, Pieterse, Shortus, Tracy, Van Humbeeck</i> |
|                |                      | Handling Agreement & Disagreement                   | <i>Chhabra, Landmark, Lown, McLeod, Pieterse, Schulman-Green, Shortus</i>                                                        |
|                |                      | Mutual Agreement                                    | <i>Pieterse</i>                                                                                                                  |
|                |                      | Negotiate Roles/Responsibilities of Patient and HCP | <i>Elwyn, Lown, Murdoch, Salter, Shepherd</i>                                                                                    |
|                | Planning & Preparing | Action Plans                                        | <i>Elwyn, Feiring, Murdoch, Salter, Vermont</i>                                                                                  |
|                |                      | Agreeing on Priorities                              | <i>Aita, McLeod, Ford'06, Lown, Murdoch, Salter, Shortus, Van Humbeeck, Vermont, Zulman</i>                                      |
|                |                      | Arranging Follow-Up                                 | <i>Elwyn, Ford'03, Ford'06, Golden, Landmark, Lown, McLeod, Salter, Shepherd, Vermont</i>                                        |
|                |                      | Mutual Planning                                     | <i>McLeod, Paiva, Salter, Schulman-Green, Shortus</i>                                                                            |
|                |                      | Collaborative Goal Setting                          | <i>Murdoch, Paiva, Salter, Vermont</i>                                                                                           |
|                |                      | Prepare for the Consultation                        | <i>Ford'03, Salter, Shortus, Zulman</i>                                                                                          |
|                |                      | Preparing for Personalization                       | <i>Shortus, Zulman</i>                                                                                                           |
|                | Processing           | Actively Manage the Patient's Involvement           | <i>Shortus</i>                                                                                                                   |
|                |                      | Allowing/Investing Time                             | <i>Friedberg, Lown, McLeod, Salter</i>                                                                                           |
|                |                      | Coordination/Continuity of Care                     | <i>Aita, Davis, Feiring, Ford'03, Friedberg, Landmark, McLeod, Salter</i>                                                        |
|                |                      | Don't Rush, Take Time                               | <i>Ford'03, Lown, McLeod, Schulman-Green</i>                                                                                     |

| Primary Themes                                                     | Subthemes                          | Healthcare Professional Approaches/Behaviors                        | Citation(s)                                                                                                  |
|--------------------------------------------------------------------|------------------------------------|---------------------------------------------------------------------|--------------------------------------------------------------------------------------------------------------|
|                                                                    |                                    | EHR, Recording, Record-Keeping Documenting                          | For'02, Friedberg, Hisham, Jefford, McLeod, Zulman                                                           |
|                                                                    |                                    | Following-Up                                                        | Davis, Elwyn, Feiring, Ford'03, Ford'06, Golden, Landmark, McLeod, Pieterse, Vermunt                         |
|                                                                    |                                    | Keeps a Long-Term Focus                                             | David, Murdoch, Schulman-Green, Shortus                                                                      |
|                                                                    |                                    | Leaving Time for Questions                                          | Golden                                                                                                       |
|                                                                    |                                    | Systematic Process, Stages, Approaches to the Consultation and Care | Vermunt                                                                                                      |
|                                                                    | Professionalism                    | Being Consistent with Information/Care/Decisions                    | Paiva, Vermunt                                                                                               |
|                                                                    |                                    | Honesty and Transparency                                            | Feiring, Ford'03, Golden, Jefford, Lown, McLeod, Shortus, Van Humbeeck                                       |
|                                                                    |                                    | Responsiveness                                                      | Aita, Jefford, McLeod, Pieterse, Shepherd, Shortus, Van Humbeeck, Vermunt                                    |
|                                                                    |                                    | Realistic Approach the Patient, Care                                | Aita, Jefford, Murdoch, Pieterse, Salter, Shortus, Tracy                                                     |
|                                                                    | <b>Approaches of COMMUNICATION</b> | Acknowledging                                                       | Acknowledging Patient's Role, Effort                                                                         |
| Celebrating Successes                                              |                                    |                                                                     | McLeod, Zulman                                                                                               |
| Legitimizing Personal Preferences, Validating the Patient          |                                    |                                                                     | Landmark, Lown, McLeod, Murdoch, Pieterse, Salter, Tracy, Zulman                                             |
| Reassurances                                                       |                                    |                                                                     | Ford'03, Kennedy, Landmark, McLeod, Pieterse, Salter, Tracy, Van Humbeeck, Visser, Zulman                    |
| Showing Own Emotions                                               |                                    |                                                                     | Hall, Landmark, Lown, McLeod, Visser, Zulman                                                                 |
| Showing Understanding                                              |                                    |                                                                     | Chhabra, Davis, Elwyn, Fore'03, Grub, Jefford, Kennedy, Landmark, Lown, McLeod, Murdoch                      |
| Valuing, Acknowledging, Validating, Responding to Patient Emotions |                                    |                                                                     | Aita, Chhabra, Feiring, Ford'02, Ford'03, Grub, Hall, Jefford, Landmark, Lown, McLeod, Paiva, Visser, Zulman |
| Clarifying                                                         |                                    | Checking, Rechecking                                                | Elwyn, Ford'03, Ford'06, Landmark,                                                                           |

| Primary Themes | Subthemes              | Healthcare Professional Approaches/Behaviors            | Citation(s)                                                                                             |
|----------------|------------------------|---------------------------------------------------------|---------------------------------------------------------------------------------------------------------|
|                |                        |                                                         | <i>Murdoch, Paiva, Pieterse</i>                                                                         |
|                |                        | Clarifying Values, Preferences, Views                   | <i>Elwyn, Ford'03, Friedberg, Landmark, Lown, Murdoch, Pieterse, Vermunt</i>                            |
|                |                        | Framing & Reframing                                     | <i>Elwyn, Golden, Landmark, McLeod, Murdoch, Vermunt, Zulman</i>                                        |
|                |                        | Repeating                                               | <i>Paiva, Pieterse</i>                                                                                  |
|                |                        | Revisiting (Decisions Over Time)                        | <i>McLeod, Shortus</i>                                                                                  |
|                | Encouraging            | Approving/Amplifying Patient Appraisals/Choices         | <i>Pieterse</i>                                                                                         |
|                |                        | Encouraging/Inviting Patient Comments/Questions         | <i>Chhabra, Ford'03, Jefford, Hisham, Landmark, McLeod, Murdoch, Pieterse, Salter</i>                   |
|                |                        | Encouraging Patient to Prepare                          | <i>Murdoch, Salter</i>                                                                                  |
|                |                        | Encouraging Storytelling                                | <i>McLeod</i>                                                                                           |
|                |                        | Inviting Patient Participation                          | <i>Chhabra, McLeod, Pieterse, Salter</i>                                                                |
|                |                        | Motivational Interviewing                               | <i>McLeod, Paiva, Zulman</i>                                                                            |
|                | Exchanging Information | Defining                                                |                                                                                                         |
|                |                        | Explain, Define, Describe the Problem for Patient       | <i>Elwyn, Ford'03, Kennedy, Vermunt</i>                                                                 |
|                |                        | Inform Patient of Condition/Diagnosis/Biomedical        | <i>Aita, Ford'03, Grub, McLeod, Murdoch, Salter, Schulman-Green, Shortus</i>                            |
|                |                        | Educating                                               |                                                                                                         |
|                |                        | Coaching                                                | <i>Jeffords, Zulman</i>                                                                                 |
|                |                        | Information Giving                                      | <i>Golden, Grub, Jefford, McLeod, Paiva, Van Humbeeck, Visser</i>                                       |
|                |                        | Information/Education Aids, Materials, Tools            | <i>Davis, Golden, Jefford, McLeod, Zulman</i>                                                           |
|                |                        | Patient Education                                       | <i>Chhabra, Davis, Feiring, Friedberg, Vermunt</i>                                                      |
|                |                        | Sharing Knowledge with the Patient                      | <i>Ford'03, Golden, McLeod, Paiva</i>                                                                   |
|                |                        | Interviewing & Eliciting                                |                                                                                                         |
|                |                        | Eliciting Goals                                         | <i>Aita, Chhabra, Grub, Lown, McLeod, Murdoch, Salter, Schulman-Green, Shortus, Vermunt, Zulman</i>     |
|                |                        | Eliciting Patient Appraisals (Strengths of Preferences) | <i>Pieterse</i>                                                                                         |
|                |                        | Eliciting Preferences                                   | <i>Chhabra, Davis, Elwyn, Ford'02, Ford'03, Ford'06, Friedberg, Golden Grub, Hart, Hisham, Jefford,</i> |

| Primary Themes | Subthemes           | Healthcare Professional Approaches/Behaviors                                         | Citation(s)                                                                                                                                                                        |
|----------------|---------------------|--------------------------------------------------------------------------------------|------------------------------------------------------------------------------------------------------------------------------------------------------------------------------------|
|                |                     |                                                                                      | Kennedy, Landmark, Lown, McLeod, Murdoch, Pieterse, Salter, Schulman-Green, Shepherd, Shortus, Tracy, Van Humbeeck, Vermunt, Visser, Zulman                                        |
|                |                     | Eliciting Values                                                                     | Aita, Chhabra, Davis, Elwyn, Ford'02, Ford'03, Friedberg, Golden, Grub, Hart, Hall, Hisham, Kennedy, Landmark, Lown, McLeod, Murdoch, Schulman-Green, Tracy, Van Humbeeck, Vermunt |
|                |                     | Eliciting Circumstances                                                              | Aita, Salter, Schulman-Green, Tracy, Zulman                                                                                                                                        |
|                |                     | Eliciting Patient Feelings                                                           | Feiring, Golden, Hall, Landmark, Lown, McLeod, Pieterse, Visser                                                                                                                    |
|                |                     | Patient-Centered Interviewing                                                        | Aita, Paiva, Vermunt, Zulman                                                                                                                                                       |
|                | Presenting Evidence | Discussing Risks/Benefits/Side-Effects/Trade-Offs                                    | Chhabra, Elwyn, Ford'02, Ford'03, Friedberg, Golden, Jefford, Lown, McLeod, Paiva, Pieterse, Shepherd, Vermunt                                                                     |
|                |                     | Presenting, Sharing, Explaining Evidence                                             | Ford'03, Friedberg, Grub, McLeod, Pieterse, Tracy, Vermunt                                                                                                                         |
|                |                     | Willingness to See More Information, Encourages Patient to Look for More Information | Ford'03, Jefford, Lown, Visser                                                                                                                                                     |
|                | Exploring           | Asking Questions                                                                     | Chhabra, Ford'02, Ford'03, Jefford, McLeod                                                                                                                                         |
|                |                     | Assessing Values, Preferences, Expectations                                          | Ford'03, Grub, Landmark, Shepherd                                                                                                                                                  |
|                |                     | Explore Ideas, Perspective, Alternatives                                             | Elwyn, Landmark, Shepherd, Visser                                                                                                                                                  |
|                |                     | Explore Cues and Clues (Verbal and Non-Verbal)                                       | Chhabra, Elwyn, Ford'03, Hall, Kennedy, McLeod, Salter, Visser, Zulman                                                                                                             |
|                |                     | Explore Fears, Concerns, Distresses, Emotions                                        | Elwyn, Ford'02, Ford'03, Ford'06, Golden, Lown, Salter, Visser, Zulman                                                                                                             |
|                |                     | Signaling (Pausing, Thinking Out Loud, Non-Verbal Cues)                              | Chhabra, Elwyn, Jefford, Hall, McLeod, Murdoch, Pieterse, Visser, Zulman                                                                                                           |



| <i>Primary Themes</i>           | <i>Subthemes</i>        | <i>Healthcare Professional Approaches/Behaviors</i>               | <i>Citation(s)</i>                                                                                                        |
|---------------------------------|-------------------------|-------------------------------------------------------------------|---------------------------------------------------------------------------------------------------------------------------|
|                                 | Language                | Deferential Language                                              | <i>Chhabra</i>                                                                                                            |
|                                 |                         | Directive Language                                                | <i>Ford'02</i>                                                                                                            |
|                                 |                         | Emotion-Oriented Speech                                           | <i>Visser</i>                                                                                                             |
|                                 |                         | Use Common Language, No Jargon                                    | <i>Lown, Paiva, Pieterse</i>                                                                                              |
|                                 |                         | Using Inviting Language                                           | <i>Chhabra</i>                                                                                                            |
|                                 |                         | Variations in Tone of Voice                                       | <i>Hall, McLeod, Visser, Zulman</i>                                                                                       |
|                                 | Summarizing             | Highlight/Repeat Patient's Appraisal/Choice                       | <i>Pieterse</i>                                                                                                           |
|                                 |                         | Providing Summaries to the Patient (Written or Audio)             | <i>Hart, Jefford</i>                                                                                                      |
|                                 |                         | Summarizing in the Encounter                                      | <i>Landmark</i>                                                                                                           |
| <b>Approaches of CONGRUENCE</b> | Adjusting & Tailoring   | Adjust Approach Based on Patient's Needs, Values, Preferences     | <i>Ford'03, Hall, Jefford, Lown, Paiva, Visser, Zulman</i>                                                                |
|                                 |                         | Tailor Options for the Patient                                    | <i>Elwyn, Feiring, Ford'03, Friedberg, Golden, Hart, McLeod, Paiva, Pieterse, Shepherd, Shortus, Van Humbeeck, Zulman</i> |
|                                 | Balancing & Flexibility | Flexibility In Overall Approach to Care                           | <i>Aita, Elwyn, Ford'02, Ford'03, Ford'06, McLeod, Shortus, Tracy, Van Humbeeck, Vermont, Visser</i>                      |
|                                 |                         | Balancing Information, Issues, Needs, Power, and Responsibilities | <i>Ford'03, Friedberg, Golden, Grub, Hisham, Jefford, Lown, McLeod, Paiva, Pieterse, Salter, Shortus</i>                  |

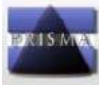

## PRISMA 2020 for Abstracts Checklist

[For: Tringale, Michael et al, bmjopen-2022-067268]

| Section and Topic       | Item # | Checklist item                                                                                                                                                                                                                                                                                        | Reported (Yes/No) |
|-------------------------|--------|-------------------------------------------------------------------------------------------------------------------------------------------------------------------------------------------------------------------------------------------------------------------------------------------------------|-------------------|
| <b>TITLE</b>            |        |                                                                                                                                                                                                                                                                                                       |                   |
| Title                   | 1      | Identify the report as a systematic review.                                                                                                                                                                                                                                                           | P. 6              |
| <b>BACKGROUND</b>       |        |                                                                                                                                                                                                                                                                                                       |                   |
| Objectives              | 2      | Provide an explicit statement of the main objective(s) or question(s) the review addresses.                                                                                                                                                                                                           | P. 6              |
| <b>METHODS</b>          |        |                                                                                                                                                                                                                                                                                                       |                   |
| Eligibility criteria    | 3      | Specify the inclusion and exclusion criteria for the review.                                                                                                                                                                                                                                          | P. 7              |
| Information sources     | 4      | Specify the information sources (e.g. databases, registers) used to identify studies and the date when each was last searched.                                                                                                                                                                        | P. 6              |
| Risk of bias            | 5      | Specify the methods used to assess risk of bias in the included studies.                                                                                                                                                                                                                              | P. 7              |
| Synthesis of results    | 6      | Specify the methods used to present and synthesise results.                                                                                                                                                                                                                                           | P. 6-7            |
| <b>RESULTS</b>          |        |                                                                                                                                                                                                                                                                                                       |                   |
| Included studies        | 7      | Give the total number of included studies and participants and summarise relevant characteristics of studies.                                                                                                                                                                                         | P. 7              |
| Synthesis of results    | 8      | Present results for main outcomes, preferably indicating the number of included studies and participants for each. If meta-analysis was done, report the summary estimate and confidence/credible interval. If comparing groups, indicate the direction of the effect (i.e. which group is favoured). | P. 7              |
| <b>DISCUSSION</b>       |        |                                                                                                                                                                                                                                                                                                       |                   |
| Limitations of evidence | 9      | Provide a brief summary of the limitations of the evidence included in the review (e.g. study risk of bias, inconsistency and imprecision).                                                                                                                                                           | P. 8              |
| Interpretation          | 10     | Provide a general interpretation of the results and important implications.                                                                                                                                                                                                                           | P. 7              |
| <b>OTHER</b>            |        |                                                                                                                                                                                                                                                                                                       |                   |
| Funding                 | 11     | Specify the primary source of funding for the review.                                                                                                                                                                                                                                                 | P. 37             |
| Registration            | 12     | Provide the register name and registration number.                                                                                                                                                                                                                                                    | P. 8              |

From: Page MJ, McKenzie JE, Bossuyt PM, Boutron I, Hoffmann TC, Mulrow CD, et al. The PRISMA 2020 statement: an updated guideline for reporting systematic reviews. *BMJ* 2021;372:n71. doi: 10.1136/bmj.n71

For more information, visit: <http://www.prisma-statement.org/>

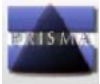

## PRISMA 2020 Checklist (Modified for Qualitative Synthesis)

| Section and Topic             | Item # | Checklist item                                                                                                                                                                                                                                                                                       | Location where item is reported |
|-------------------------------|--------|------------------------------------------------------------------------------------------------------------------------------------------------------------------------------------------------------------------------------------------------------------------------------------------------------|---------------------------------|
| <b>TITLE</b>                  |        |                                                                                                                                                                                                                                                                                                      |                                 |
| Title                         | 1      | Identify the report as a systematic review of qualitative evidence.                                                                                                                                                                                                                                  | P. 6                            |
| <b>ABSTRACT</b>               |        |                                                                                                                                                                                                                                                                                                      |                                 |
| Abstract                      | 2      | See the PRISMA 2020 for Abstracts checklist.                                                                                                                                                                                                                                                         | P. 6-8                          |
| <b>INTRODUCTION</b>           |        |                                                                                                                                                                                                                                                                                                      |                                 |
| Rationale                     | 3      | Describe the rationale for the review in the context of existing knowledge.                                                                                                                                                                                                                          | P. 9-11                         |
| Objectives                    | 4      | Provide an explicit statement of the objective(s) or question(s) the review addresses.                                                                                                                                                                                                               | P. 11                           |
| <b>METHODS</b>                |        |                                                                                                                                                                                                                                                                                                      |                                 |
| Eligibility criteria          | 5      | Specify the inclusion and exclusion criteria for the review and how studies were grouped for the syntheses.                                                                                                                                                                                          | P. 12-13                        |
| Information sources           | 6      | Specify all databases, registers, websites, organisations, reference lists and other sources searched or consulted to identify studies. Specify the date when each source was last searched or consulted.                                                                                            | P. 12                           |
| Search strategy               | 7      | Present the full search strategies for all databases, registers and websites, including any filters and limits used.                                                                                                                                                                                 | P. 12 and Appendix B            |
| Selection process             | 8      | Specify the methods used to decide whether a study met the inclusion criteria of the review, including how many reviewers screened each record and each report retrieved, whether they worked independently, and if applicable, details of automation tools used in the process.                     | P. 12-13                        |
| Data collection process       | 9      | Specify the methods used to collect data from reports, including how many reviewers collected data from each report, whether they worked independently, any processes for obtaining or confirming data from study investigators, and if applicable, details of automation tools used in the process. | P. 12-13                        |
| Data items                    | 10a    | List and define all outcomes for which data were sought. Specify whether all results that were compatible with each outcome domain in each study were sought (e.g. for all measures, time points, analyses), and if not, the methods used to decide which results to collect.                        | P. 14                           |
|                               | 10b    | List and define all other variables for which data were sought (e.g. participant and intervention characteristics, funding sources). Describe any assumptions made about any missing or unclear information.                                                                                         | P. 14                           |
| Study risk of bias assessment | 11     | Specify the methods used to assess quality of the included studies, including details of the tool(s) used, how many reviewers assessed each study and whether they worked independently, and if applicable, details of automation tools used in the process.                                         | P. 13-14                        |
| Effect measures               | 12     | Specify for each outcome the effect measure(s) (e.g. risk ratio, mean difference) used in the synthesis or presentation of results.                                                                                                                                                                  | Not applicable                  |
| Synthesis methods             | 13a    | Describe the processes used to decide which studies were eligible for each synthesis (e.g. tabulating the study intervention characteristics and comparing against the planned groups for each synthesis (item #5)).                                                                                 | P. 12-13                        |
|                               | 13b    | Describe any methods required to prepare the data for presentation or synthesis, such as handling of missing summary statistics, or data conversions.                                                                                                                                                | P. 12-13                        |
|                               | 13c    | Describe any methods used to synthesize or visually display results of individual studies and syntheses.                                                                                                                                                                                             | P. 12-13                        |
|                               | 13d    | Describe any methods used to synthesize results and provide a rationale for the choice(s). If meta-analysis was performed, describe the model(s), method(s) to identify the presence and extent of statistical heterogeneity, and software package(s) used.                                          | P. 11-15                        |
|                               | 13e    | Describe any methods used to explore possible causes of heterogeneity among study results (e.g. subgroup analysis, meta-regression).                                                                                                                                                                 | Not applicable                  |
|                               | 13f    | Describe any sensitivity analyses conducted to assess robustness of the synthesized results.                                                                                                                                                                                                         | Not applicable                  |

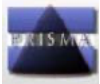

## PRISMA 2020 Checklist (Modified for Qualitative Synthesis)

| Section and Topic             | Item # | Checklist item                                                                                                                                                                                                                   | Location where item is reported          |
|-------------------------------|--------|----------------------------------------------------------------------------------------------------------------------------------------------------------------------------------------------------------------------------------|------------------------------------------|
|                               |        |                                                                                                                                                                                                                                  | applicable                               |
| Reporting bias assessment     | 14     | Describe any methods used to assess risk of bias due to missing results in a synthesis (arising from reporting biases).                                                                                                          | P. 35-36<br>"Reflexivity Statement"      |
| Certainty assessment          | 15     | Describe any methods used to assess certainty (or confidence) in the body of evidence for an outcome.                                                                                                                            | P. 13-14                                 |
| <b>RESULTS</b>                |        |                                                                                                                                                                                                                                  |                                          |
| Study selection               | 16a    | Describe the results of the search and selection process, from the number of records identified in the search to the number of studies included in the review, ideally using a flow diagram.                                     | P. 15-16                                 |
|                               | 16b    | Cite studies that might appear to meet the inclusion criteria, but which were excluded, and explain why they were excluded.                                                                                                      | P. 32                                    |
| Study characteristics         | 17     | Cite each included study and present its characteristics.                                                                                                                                                                        | P. 17-18<br>Table 1                      |
| Risk of bias in studies       | 18     | Present assessments of quality for each included study.                                                                                                                                                                          | P. 16 and<br>Appendix C                  |
| Results of individual studies | 19     | For all outcomes, present, for each study: (a) summary statistics for each group (where appropriate) and (b) an effect estimate and its precision (e.g. confidence/credible interval), ideally using structured tables or plots. | Summary of Complete Findings, Appendix E |
| Results of syntheses          | 20a    | For each synthesis, briefly summarise the methodological quality among contributing studies.                                                                                                                                     | Appendix C                               |
|                               | 20b    | Present results of all qualitative syntheses conducted.                                                                                                                                                                          | P. 19-30 and<br>Table 2                  |
|                               | 20c    | Present results of all investigations of possible causes of heterogeneity among study results.                                                                                                                                   | Not Applicable                           |
|                               | 20d    | Present results of all sensitivity analyses conducted to assess the robustness of the synthesized results.                                                                                                                       | Not Applicable                           |
| Reporting biases              | 21     | Present assessments of risk of bias due to missing results (arising from reporting biases) for each synthesis assessed.                                                                                                          | P. 35-36<br>"Reflexivity Statement"      |
| Certainty of evidence         | 22     | Present assessments of certainty (or confidence) in the body of evidence for each outcome assessed.                                                                                                                              | P. 16 and<br>Appendix C                  |
| <b>DISCUSSION</b>             |        |                                                                                                                                                                                                                                  |                                          |
| Discussion                    | 23a    | Provide a general interpretation of the results in the context of other evidence.                                                                                                                                                | P. 30-32                                 |
|                               | 23b    | Discuss any limitations of the evidence included in the review.                                                                                                                                                                  | P. 30-32                                 |
|                               | 23c    | Discuss any limitations of the review processes used.                                                                                                                                                                            | P. 32-33                                 |
|                               | 23d    | Discuss implications of the results for practice, policy, and future research.                                                                                                                                                   | P. 33-35                                 |
| <b>OTHER INFORMATION</b>      |        | For peer review only - <a href="http://bmjopen.bmj.com/site/about/guidelines.xhtml">http://bmjopen.bmj.com/site/about/guidelines.xhtml</a>                                                                                       |                                          |

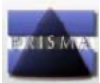

# PRISMA 2020 Checklist (Modified for Qualitative Synthesis)

| Section and Topic                              | Item # | Checklist item                                                                                                                                                                                                                             | Location where item is reported |
|------------------------------------------------|--------|--------------------------------------------------------------------------------------------------------------------------------------------------------------------------------------------------------------------------------------------|---------------------------------|
| Registration and protocol                      | 24a    | Provide registration information for the review, including register name and registration number, or state that the review was not registered.                                                                                             | P. 8, 11 and Appendix A         |
|                                                | 24b    | Indicate where the review protocol can be accessed, or state that a protocol was not prepared.                                                                                                                                             | P. 8, 11 and Appendix A         |
|                                                | 24c    | Describe and explain any amendments to information provided at registration or in the protocol.                                                                                                                                            | P. 8, 11 and Appendix A         |
| Support                                        | 25     | Describe sources of financial or non-financial support for the review, and the role of the funders or sponsors in the review.                                                                                                              | P. 37                           |
| Competing interests                            | 26     | Declare any competing interests of review authors.                                                                                                                                                                                         | P. 37                           |
| Availability of data, code and other materials | 27     | Report which of the following are publicly available and where they can be found: template data collection forms; data extracted from included studies; data used for all analyses; analytic code; any other materials used in the review. | P. 37                           |

From: Page MJ, McKenzie JE, Bossuyt PM, Boutron I, Hoffmann TC, Mulrow CD, et al. The PRISMA 2020 statement: an updated guideline for reporting systematic reviews. BMJ 2021;372:n71. doi: 10.1136/bmj.n71

For more information, visit: <http://www.prisma-statement.org/>

# BMJ Open

## Integrating Patient Values and Preferences in Health Care: A Systematic Review of Qualitative Evidence

|                                 |                                                                                                                                                                                                                                       |
|---------------------------------|---------------------------------------------------------------------------------------------------------------------------------------------------------------------------------------------------------------------------------------|
| Journal:                        | <i>BMJ Open</i>                                                                                                                                                                                                                       |
| Manuscript ID                   | bmjopen-2022-067268.R1                                                                                                                                                                                                                |
| Article Type:                   | Original research                                                                                                                                                                                                                     |
| Date Submitted by the Author:   | 20-Oct-2022                                                                                                                                                                                                                           |
| Complete List of Authors:       | Tringale, Michael; University of Oxford, Stephen, GenIa; University of Oxford<br>Boylan, Anne-Marie; Oxford University, Nuffield Department of Primary Care Health Sciences<br>Heneghan, Carl; Oxford University, Primary Health Care |
| <b>Primary Subject Heading</b>: | Patient-centred medicine                                                                                                                                                                                                              |
| Secondary Subject Heading:      | Communication, Evidence based practice, Qualitative research, General practice / Family practice                                                                                                                                      |
| Keywords:                       | GENERAL MEDICINE (see Internal Medicine), PRIMARY CARE, Asthma < THORACIC MEDICINE, General diabetes < DIABETES & ENDOCRINOLOGY, Adult oncology < ONCOLOGY, Adult cardiology < CARDIOLOGY                                             |
|                                 |                                                                                                                                                                                                                                       |

SCHOLARONE™  
Manuscripts



I, the Submitting Author has the right to grant and does grant on behalf of all authors of the Work (as defined in the below author licence), an exclusive licence and/or a non-exclusive licence for contributions from authors who are: i) UK Crown employees; ii) where BMJ has agreed a CC-BY licence shall apply, and/or iii) in accordance with the terms applicable for US Federal Government officers or employees acting as part of their official duties; on a worldwide, perpetual, irrevocable, royalty-free basis to BMJ Publishing Group Ltd ("BMJ") its licensees and where the relevant Journal is co-owned by BMJ to the co-owners of the Journal, to publish the Work in this journal and any other BMJ products and to exploit all rights, as set out in our [licence](#).

The Submitting Author accepts and understands that any supply made under these terms is made by BMJ to the Submitting Author unless you are acting as an employee on behalf of your employer or a postgraduate student of an affiliated institution which is paying any applicable article publishing charge ("APC") for Open Access articles. Where the Submitting Author wishes to make the Work available on an Open Access basis (and intends to pay the relevant APC), the terms of reuse of such Open Access shall be governed by a Creative Commons licence – details of these licences and which [Creative Commons](#) licence will apply to this Work are set out in our licence referred to above.

Other than as permitted in any relevant BMJ Author's Self Archiving Policies, I confirm this Work has not been accepted for publication elsewhere, is not being considered for publication elsewhere and does not duplicate material already published. I confirm all authors consent to publication of this Work and authorise the granting of this licence.

## TITLE

Integrating Patient Values and Preferences in Health Care: A Systematic Review of Qualitative Evidence

## AUTHORS

Tringale, Michael; *University of Oxford, Kellogg College, Postgraduate Researcher*  
Stephen, Genia; *University of Oxford, Kellogg College, Postgraduate Researcher*  
Boylan, Anne-Marie; *University of Oxford, Nuffield Department of Primary Care Health Sciences*

Heneghan, Carl; *University of Oxford, Primary Care Health Sciences*

Correspondence to Michael Tringale, [miketringale@gmail.com](mailto:miketringale@gmail.com)

## ABSTRACT

**Objectives** - To identify and thematically analyze how healthcare professionals (HCPs) integrate patient values and preferences (“values integration”) in primary care for adults with noncommunicable diseases (NCDs).

**Design** – Systematic review and meta-aggregation methods were used for extraction, synthesis, and analysis of qualitative evidence.

**Data sources** – Relevant records were sourced using keywords to search 12 databases (ASSIA, CINAHL, DARE, EMBASE, ERIC, Google Scholar, GreyLit, Ovid-MEDLINE, PsycINFO, PubMed-MEDLINE, Scopus, and Web of Science).



1  
2  
3  
4  
5 **Eligibility criteria** – Records needed to be published between 2000-2020 and report  
6  
7 qualitative methods and findings in English involving HCP participants regarding primary  
8  
9 care for adult patients.  
10  
11  
12  
13  
14

15 **Data extraction and synthesis** – Relevant data including participant quotations, authors'  
16  
17 observations, interpretations, and conclusions were extracted, synthesized, and analyzed in  
18  
19 a phased approach using a modified version of the Joanna Briggs Institute (JBI) Data  
20  
21 Extraction Tool, as well as EPPI Reviewer and NVivo software. The JBI Critical Appraisal  
22  
23 Checklist for Qualitative Research was used to assess methodological quality of included  
24  
25 records.  
26  
27  
28  
29  
30  
31

32 **Results** – Thirty-one records involving more than 1,032 HCP participants and 1,823 HCP-  
33  
34 patient encounters were reviewed. Findings included 143 approaches to values integration  
35  
36 in clinical care, thematically analyzed and synthesized into four themes: (1) *Approaches of*  
37  
38 *Concern*; (2) *Approaches of Competence*; (3) *Approaches of Communication*; and, (4)  
39  
40 *Approaches of Congruence*. Confidence in the quality of included records was deemed high.  
41  
42  
43  
44  
45  
46

47 **Conclusions** – HCPs incorporate patient values and preferences in health care through a  
48  
49 variety of approaches including showing concern for the patient as a person, demonstrating  
50  
51 competence at managing diseases, communicating with patients as partners, and tailoring,  
52  
53 adjusting, and balancing overall care. Themes in this review provide a novel framework for  
54  
55 understanding and addressing values integration in clinical care and provide useful insights  
56  
57 for policymakers, educators, and practitioners.  
58  
59  
60

1  
2  
3  
4  
5  
6  
7  
8 **Protocol registration** – No. [CRD42020166002](https://www.crd.york.ac.uk/prospero/) on PROSPERO international prospective  
9 register of systematic reviews <https://www.crd.york.ac.uk/prospero/> (supplemental  
10 appendix A).  
11  
12

### 13 14 15 **Strengths and limitations of this study**

- 16  
17 • This is the first systematic review to identify and thematically analyze approaches to  
18 values integration in clinical care.  
19
- 20 • An extensive search strategy and well-defined study selection criteria were employed to  
21 find qualitative evidence related to this topic.  
22
- 23 • Systematic, transparent methods were used to appraise the quality of included records,  
24 extract, and analyze data.  
25
- 26 • Thematic analysis can present limitations as it involves subjective interpretation of  
27 previously reported evidence.  
28  
29  
30  
31  
32  
33  
34  
35  
36  
37  
38  
39

### 40 41 **INTRODUCTION**

42  
43 The practice of evidence-based medicine (EBM) calls for patient values and preferences to  
44 be considered and integrated by clinicians alongside the best available research and clinical  
45 expertise. <sup>1</sup> These three forces comprise the EBM “triad” (figure 1) and, when  
46 conscientiously and judiciously applied <sup>2</sup> by health care professionals (HCPs), it is believed  
47 that optimal patient-centered care can be achieved. <sup>3</sup>  
48  
49  
50  
51  
52  
53  
54  
55  
56  
57  
58

59 *Figure 1 – The Evidence-Based Medicine (EBM) Triad*  
60

(FIGURE 1 HERE)

Delivering patient-centered care relies on understanding the patient's values and preferences at every stage, <sup>4</sup> but acquiring this knowledge is challenging. Patients and their needs are heterogenous, difficult to predict, subject to change, and dependent on a many factors. <sup>5</sup>

Patient values and preferences are the unique understandings, preferences, concerns, expectations, and life circumstances of each patient. <sup>6</sup> *Values* are defined as a patient's attitudes and perceptions about certain health care options, and *preferences* are their preferred choices after accounting for their values. <sup>7</sup>

A recent systematic review of qualitative studies identified a taxonomy of what patients say they value in health care including uniqueness, autonomy, compassion, professionalism, responsiveness, partnership, and empowerment. <sup>8</sup> While this is useful for understanding what patients value and prefer, the question remains: How do HCPs *integrate* values and preferences into clinical care for individual patients? Very little research has been done on this critical component of EBM.

Research evidence (especially quantitative research, randomized controlled trials [RCTs] in particular) <sup>9</sup> has received most of the attention in EBM, with less systematic consideration given to values integration which has been "almost completely ignored" <sup>10</sup> resulting in a paucity of data on values integration in clinical decision-making. <sup>11</sup>

1  
2  
3  
4  
5  
6  
7  
8 Research on patient values and preferences – and how HCPs approach values integration –  
9  
10 tends to be reliant on qualitative evidence,<sup>8</sup> a level of evidence that does not appear in the  
11  
12 standard EBM hierarchy of evidence.<sup>12-14</sup> Considerations for patient values and preferences  
13  
14 are seldom encoded into clinical practice guidelines<sup>15</sup> and there are no established methods  
15  
16 for addressing values integration when developing guidelines.<sup>16</sup>  
17  
18  
19  
20  
21

22 Noncommunicable diseases (NCDs), also known as chronic diseases, are defined by the  
23  
24 World Health Organization (WHO) as conditions of long duration resulting from a number of  
25  
26 physical, behavioral, or environmental factors, and account for 7-out-of-10 deaths  
27  
28 worldwide.<sup>17</sup> The four most common categories of NCDs include cancers, diabetes,  
29  
30 cardiovascular (CV) diseases, and chronic respiratory diseases. These are often managed in  
31  
32 primary and secondary care settings<sup>18</sup> and require ongoing therapeutic relationships  
33  
34 involving more frequent HCP-patient interaction which makes values integration even more  
35  
36 important.  
37  
38  
39  
40  
41  
42  
43

44 Improvements in patient-centered care can lead to improved outcomes including lowering  
45  
46 readmission rates, decreasing hospital lengths-of-stay, reducing mortality, and better  
47  
48 management of chronic diseases overall.<sup>17</sup> Therefore, understanding how to better  
49  
50 incorporate patient values and preferences in health care is an essential skill that can  
51  
52 improve clinical outcomes<sup>19</sup> and patient satisfaction<sup>20</sup> to help reduce the burden of NCDs.  
53  
54  
55  
56  
57  
58  
59  
60

1  
2  
3  
4  
5 The primary objective of this review is to identify and thematically analyze how HCPs  
6  
7 integrate patient values and preferences in primary care for adults with NCDs.  
8  
9

## 10 11 12 **METHODS**

### 13 14 15 **Methodology**

16  
17 This review utilized a meta-aggregation methodology.<sup>21</sup> A protocol was prospectively  
18 published on the PROSPERO international register of systematic reviews,  
19  
20 <https://www.crd.york.ac.uk/prospero/> registration No. CRD42020166002 (supplemental  
21  
22 appendix A).  
23  
24  
25  
26  
27  
28  
29

### 30 31 **Participants and phenomena of interest**

32 Participants included practicing HCPs in primary and secondary care: professionals with  
33  
34 experience in direct patient care in non-inpatient and non-emergency settings, including  
35  
36 doctors, nurses, and other clinicians.<sup>22</sup> Phenomena of interest included HCP approaches,  
37  
38 behaviors, attitudes, perceptions, experiences, perspectives, opinions, and observations  
39  
40 regarding values integration in clinical care.  
41  
42  
43  
44  
45  
46

### 47 48 **Information sources and search strategy**

49 Authors were interested in current relevant practice so this review's pre-planned search  
50  
51 considered studies and other evidence published between January 2000 and August  
52  
53 2020 with full text available in English reporting data derived from HCP participants. Only  
54  
55 studies using qualitative methods including, but not limited to, interviews, focus groups,  
56  
57 direct observations, surveys, narrative reviews, or content analysis were included.  
58  
59  
60

1  
2  
3  
4  
5  
6  
7  
8 Search terms were identified and adapted from an initial scoping of databases and an  
9  
10 analysis of text from titles, abstracts, and index terms, followed by a systematic literature  
11  
12 search of 12 databases (ASSIA, CINAHL, DARE, EMBASE, ERIC, Google Scholar, GreyLit, Ovid-  
13  
14 MEDLINE, PsycINFO, PubMed-MEDLINE, Scopus, and Web of Science). The search was  
15  
16 tailored to the unique formats, operators, and conventions of each database using a variety  
17  
18 of search terms related to participants, phenomena of interest, context, setting, and  
19  
20 qualitative methodologies and methods (supplemental appendix B).  
21  
22  
23  
24  
25  
26

### 27 **Study eligibility and selection**

28  
29 Two reviewers (MT and GS) participated in a four-stage screening and selection process  
30  
31 utilizing the EPPI Reviewer software<sup>23</sup> including independent double-screening<sup>24</sup> of ten  
32  
33 percent of initial abstracts and titles, single screening of remaining titles and abstracts, full-  
34  
35 text screening of all records not yet excluded, and forward-backward search and screening  
36  
37 of additional citations. Conflicts among screeners were resolved by conference and mutual  
38  
39 agreement or by a third reviewer. Inclusion/exclusion criteria were pre-determined by  
40  
41 reviewers including:  
42  
43  
44  
45  
46  
47  
48

- 49 • Evidence type (Excluded records that did not use any qualitative methods and did not  
50 report qualitative findings);
- 51
- 52 • Date (Excluded records published before the year 2000);
- 53
- 54 • Language (Excluded records for which full text was not available in the English language);
- 55
- 56 • Phenomena of interest (Excluded records that did not report findings related to  
57  
58  
59  
60

1  
2  
3  
4  
5 incorporating patient values and preferences);

- 6  
7
- 8 • Target group (Excluded records that did not involve HCP participants, or were not  
9 concerned with HCP interactions with adult patients);
  - 10  
11 • Disease/condition type (Excluded records that did not refer to primary or secondary care  
12 or one of the top four most common NCD categories [oncology (cancers), cardiovascular,  
13 endocrine related (diabetes), and respiratory]).  
14  
15  
16  
17  
18  
19  
20  
21

## 22 **Appraisal of quality**

23  
24 The objectivity of qualitative research can be strengthened through the use of quality  
25 methods.<sup>25</sup> This review utilized the Joanna Briggs Institute (JBI) Critical Appraisal Checklist  
26 for Qualitative Research,<sup>21, 26, 27</sup> a validated tool to help determine the methodological  
27 quality of included records in systematic reviews (supplemental appendix C).  
28  
29  
30  
31  
32  
33  
34  
35  
36

## 37 **Extraction, synthesis, and analysis**

38  
39 This review employed meta-aggregative methods for extraction, synthesis, and analysis.<sup>21</sup>  
40  
41 Data including participant quotations, authors' observations, interpretations, and  
42 conclusions were extracted in a phased approach using a modified version of the JBI Data  
43 Extraction Tool<sup>27</sup> (supplemental appendix D). One author with experience in qualitative  
44 methods and coding conducted line-by-line coding using NVivo<sup>28</sup> computer software  
45 allowing for simultaneous coding and an initial synthesis of the information.<sup>29</sup>  
46  
47  
48  
49  
50  
51  
52  
53  
54  
55

56 Using an inductive approach, extraction began with reading and re-reading records to  
57 become familiar with the content followed by hand-coding of all records. This enabled the  
58  
59  
60

1  
2  
3  
4  
5 development of a preliminary coding scheme for organizing and managing data in NVivo,  
6  
7 wherein the author continued to inductively and iteratively code the data. Codes were  
8  
9 collated, analyzed, grouped, and categorized into a number of increasingly narrow sets of  
10  
11 codes based on statements and ideas across data. Themes, developed from the codes, were  
12  
13 further synthesized based on patterns and similarities in their meaning to arrive at a final set  
14  
15 of primary themes that could be used as a basis for a meaningful summary and  
16  
17 interpretation. Themes were only considered if there were two or more codes underlying  
18  
19 the theme.  
20  
21  
22  
23  
24  
25  
26

### 27 **Excluded data**

28  
29 Some records reported mixed methods, but quantitative data and/or data not derived from  
30  
31 HCP participants was excluded from this review.  
32  
33  
34  
35  
36

### 37 **Patient and public involvement**

38  
39 It was not appropriate or possible to involve patients or the public in the design, conduct,  
40  
41 reporting, or dissemination plans of this systematic review. However, a minority of the  
42  
43 included records reported patient and public involvement in their methods.  
44  
45  
46  
47  
48

## 49 **RESULTS**

### 50 **Included records**

51  
52 The initial search identified 3,331 records and after full text screening 31 records were  
53  
54 included (figure 2).<sup>30</sup> No systematic review regarding values integration was published  
55  
56 between 2000 to 2020.  
57  
58  
59  
60



## Characteristics of included records

Most records were peer-reviewed published reports of original research (two are separate reports from the same study<sup>31, 32</sup>), and one was an unpublished dissertation<sup>33</sup> (table 1). The most common methods of data collection were interviews (in-depth, semi-structured [in-person and telephone]) in 17 studies,<sup>31, 32, 34-48</sup> observations (real-time, in-person, or audio/video recordings) in nine studies,<sup>33, 34, 39, 48-53</sup> and focus groups in six studies.<sup>40, 41, 54-57</sup> Other methods included surveys,<sup>45, 55, 58</sup> Delphi technique,<sup>45, 48</sup> narrative description,<sup>34</sup> narrative review,<sup>59</sup> document analysis,<sup>36</sup> evidence review,<sup>60</sup> research work groups,<sup>61</sup> chart audits,<sup>34</sup> note taking,<sup>34</sup> and Video Reflexive Ethnography (VRE).<sup>62</sup> Nine studies employed more than one method.<sup>33, 34, 36, 39-41, 45, 48, 55</sup>

At least 1,032 HCP participants are represented in the included records, including 477 nurses/nurse practitioners, 417 physicians, and 138 other HCP types including allied health professionals, pharmacists, clinical administrators, nutritionists, social workers, and patient decision coaches. At least 1,823 HCP-patient consultations, encounters, or interactions (either observed or described) in various clinical settings are represented in the records.

Nearly half of the studies included were conducted in North America with 15 in the United States of America (USA) and two in Canada, followed by five in the United Kingdom (UK), three in Australia, three in the Netherlands, two in Norway, and one each in Belgium, Italy, Malaysia, and Portugal.

### Methodological quality of included records

Confidence in the quality of included records was deemed high. Most used appropriate qualitative methodologies, methods, and analytical approaches, resulting in meaningful findings and conclusions. However, most records failed to provide adequate reflexive statements locating researchers theoretically or culturally, and also failed to address the researchers' influence on the research and vice-versa (supplemental appendix C).

Figure 2 – PRISMA Flow Diagram

(FIGURE 2 HERE)

1 *Table 1 – Characteristics of Included Records*

| Author (Year)       | Ref. | Method(s)                                                                                 | Analytical Approach               | HCPs (n)              | Practice Setting(s)                   | HCP Experience | Encounters Observed | Location  | Number of Findings (Appendix E) |
|---------------------|------|-------------------------------------------------------------------------------------------|-----------------------------------|-----------------------|---------------------------------------|----------------|---------------------|-----------|---------------------------------|
| Aita V (2005)       | 34   | Chart Audits, Interviews, Narrative Descriptions, Note Taking, Participatory Observations | Coding, Group Analysis, Themes    | Physicians (44)       | 18 Family Practice Clinics            | Unspecified    | 1500                | USA       | 25                              |
| Chhabra KR (2012)   | 49   | Observations of Audio-Recorded Consultations                                              | Theme-Oriented Discourse Analysis | Oncologists (15)      | 2 Cancer Centers                      | Unspecified    | 20                  | USA       | 27                              |
| Davis K (2017)      | 35   | Semi-Structured Interviews                                                                | Coding, Themes                    | Physicians (33)       | Multiple Clinics in 2 HMO Territories | Mean 13-20yrs  | N/A                 | USA       | 20                              |
| Elwyn G (2000)      | 54   | Focus Groups                                                                              | Codes, Themes                     | GPs (6)               | 6 Service Settings                    | Mean 12yrs     | N/A                 | UK        | 40                              |
| Feiring E (2020)    | 36   | Document Analysis, In-Depth Interviews                                                    | Thematic Analysis                 | Various (8)           | 4 Specialist Institutions             | Unspecified    | N/A                 | Norway    | 16                              |
| Ford S (2002)*      | 32   | Semi-Structured Interviews                                                                | Constant Comparative Analysis     | Various (37)          | Hospitals & Clinics                   | Unspecified    | N/A                 | UK        | 17                              |
| Ford S (2003)*      | 31   | Semi-Structured Interviews                                                                | Constant Comparative Analysis     | Various (37)          | Hospitals & Clinics                   | Unspecified    | N/A                 | UK        | 54                              |
| Ford S (2006)       | 50   | Observation of Video-Taped Consultations                                                  | Thematic Coding                   | GPs (13)              | 12 GP Surgeries                       | Unspecified    | 149                 | UK        | 16                              |
| Friedberg MW (2013) | 37   | Semi-Structured Interviews                                                                | Codes, Themes                     | Various (23)          | 8 Primary Care                        | Unspecified    | N/A                 | USA       | 23                              |
| Golden SE (2017)    | 38   | Interviews                                                                                | Directed Content Analysis         | Various (20)          | 7 Medical Centers                     | Mean 12yrs     | N/A                 | USA       | 30                              |
| Gruß I (2019)       | 39   | Observations, Semi-Structured Interviews                                                  | Codes, Template Analysis          | Physicians (8)        | 1 Cancer Clinic                       | Unspecified    | 8                   | USA       | 24                              |
| Hall J (2011)       | 59   | Narrative Review                                                                          | Narrative Review                  | Various (Unspecified) | N/A                                   | N/A            | N/A                 | USA       | 18                              |
| Hart PL (2014)      | 58   | Mail Survey                                                                               | Thematic Analysis                 | Nurses (374)          | Hospital (43%)<br>Non-Hospital (57%)  | Mean 22.4yrs   | N/A                 | USA       | 10                              |
| Hisham R (2016)     | 40   | Focus Groups, In-Depth Interviews                                                         | Thematic Analysis                 | Physicians (18)       | 2 Rural Clinics                       | Mean 6.2yrs    | N/A                 | Malaysia  | 7                               |
| Jefford M (2002)    | 60   | Review                                                                                    | Review                            | Doctors (Unspecified) | Unspecified                           | Unspecified    | N/A                 | Australia | 27                              |
| Kennedy BM (2017)   | 55   | Focus Groups, Survey                                                                      | Thematic Categorization           | Various (7)           | 1 Rural Clinic                        | Median 12yrs   | N/A                 | USA       | 18                              |
| Landmark AM (2016)  | 51   | Observations of Video-Recorded Encounters                                                 | Conversation Analysis             | Physicians (17)       | 1 University Hospital                 | Unspecified    | 17                  | Norway    | 34                              |

|                                 |    |                                                                              |                                                   |                            |                                                                                                       |                                        |     |             |    |
|---------------------------------|----|------------------------------------------------------------------------------|---------------------------------------------------|----------------------------|-------------------------------------------------------------------------------------------------------|----------------------------------------|-----|-------------|----|
| <b>Lown B (2009)</b>            | 61 | Research Work Groups                                                         | Constant Comparative Analysis and Grounded Theory | PCPs (41)                  | Hospital-Based Practices                                                                              | "At Least >3yrs Post-Residency"        | N/A | USA         | 49 |
| <b>McLeod H (2017)</b>          | 33 | Observations of Video-Recorded Encounters, Video-Reflexive Ethnography (VRE) | Grounded Theory                                   | PCPs (17)                  | 1 Hospital-Based Clinic                                                                               | Unspecified                            | 15  | USA         | 89 |
| <b>Murdoch J (2020)</b>         | 52 | Observations of Video-Recorded Consultations                                 | Conversation Analysis                             | GPs (5)                    | 3 General Practices                                                                                   | Range <10 to >20yrs                    | 22  | UK          | 37 |
| <b>Paiva D (2019)</b>           | 56 | Focus Groups                                                                 | Grounded Theory                                   | Various (12)               | 1 Institution                                                                                         | Range 1 to >10yrs                      | N/A | Portugal    | 36 |
| <b>Pieterse AH (2011)</b>       | 53 | Observations of Video-Recorded Consultations                                 | Coded & Categorized Observations                  | Radiation Oncologists (10) | 1 Hospital                                                                                            | Median 7yrs                            | 25  | Netherlands | 35 |
| <b>Salter C (2019)</b>          | 41 | Focus Group, Interview, Observations of Video-Recorded Consultations         | Thematic Analysis                                 | GPs (5)                    | 3 General Practices                                                                                   | Range <10 to >20yrs                    | 40  | UK          | 40 |
| <b>Schulman-Green DJ (2006)</b> | 57 | Focus Groups                                                                 | Content Analysis                                  | Various (11)               | Hospital-Affiliated Practices                                                                         | Unspecified                            | N/A | USA         | 14 |
| <b>Shepherd HL (2011)</b>       | 42 | Telephone Interviews                                                         | Framework Analysis                                | Physicians (22)            | Unspecified                                                                                           | Mean 24yrs                             | N/A | Australia   | 19 |
| <b>Shortus T (2011)</b>         | 43 | In-Depth Interviews                                                          | Grounded Theory, Constant Comparison              | Various (29)               | "...a range of clinical settings..."                                                                  | "...a range of clinical experience..." | N/A | Australia   | 29 |
| <b>Tracy CS (2003)</b>          | 44 | Semi-Structured Interviews                                                   | Constant Comparative Method                       | FPs (15)                   | 15 Practices                                                                                          | Range 2-32yrs                          | N/A | Canada      | 18 |
| <b>Van Humbeek L (2020)</b>     | 45 | Delphi, Cognitive Interviewing, Survey                                       | Thematic Analysis                                 | Various (174)              | 2 Hospitals                                                                                           | Range <1 to >21yrs                     | N/A | Belgium     | 26 |
| <b>Vermunt N (2019)</b>         | 46 | Semi-Structured Interviews                                                   | Framework Analysis                                | Physicians (33)            | Hospitals and Community Clinics                                                                       | Range 3-34yrs                          | N/A | Netherlands | 29 |
| <b>Visser LNC (2018)</b>        | 47 | Semi-Structured Interviews                                                   | Content Analysis                                  | Oncologists (13)           | Academic and General Hospitals                                                                        | Range 4-41yrs                          | N/A | Netherlands | 31 |
| <b>Zulman DM (2020)</b>         | 48 | Delphi, Interviews, Observations                                             | Evidence Review                                   | Physicians (18)            | Primary Care Clinics at 1 Academic Medical Center, 1 VA Hospital, 1 Federally Qualified Health Center | Unspecified                            | 27  | USA         | 47 |

\*Ford 2002 and Ford 2003 are two reports from the same study. (CV "Cardiovascular;" DAS-O "Decision Analysis System for Oncology;" GP "General Practitioner;" HCP "Health Care Professional;" HCP Experience Early Career <11yrs, Mid-Career 11-20yrs, Late Career ≥21yrs<sup>63</sup>; HMO "Health Maintenance Organization;" N/A "Not Applicable;" PCP "Primary Care Physician;" SD "Standard Deviation;" VA "Veteran's Administration;" VRE "Video-Reflexive Ethnography")

## FINDINGS

This review identified 143 approaches – specific behaviors, actions, practices, or experiences of HCPs – to integrating patient values and preferences in clinical care. These were thematically analyzed and synthesized into four primary themes – approaches of Concern, Competence, Communication, and Congruence – and several subthemes (table 2). See supplemental appendix E for a complete list of approaches.

*Table 2 – Taxonomy of Themes: Approaches to Values Integration*

| CONCERN                                                                                                                                                                              | COMPETENCE                                                                                                         | COMMUNICATION                                                                                                                                                                                                                         | CONGRUENCE                                                                                                           |
|--------------------------------------------------------------------------------------------------------------------------------------------------------------------------------------|--------------------------------------------------------------------------------------------------------------------|---------------------------------------------------------------------------------------------------------------------------------------------------------------------------------------------------------------------------------------|----------------------------------------------------------------------------------------------------------------------|
| <ul style="list-style-type: none"> <li>• Advocating</li> <li>• Caring &amp; Connecting</li> <li>• Empowering</li> <li>• Inviting</li> <li>• Partnering</li> <li>• Sensing</li> </ul> | <ul style="list-style-type: none"> <li>• Decision Making</li> <li>• Managing</li> <li>• Professionalism</li> </ul> | <ul style="list-style-type: none"> <li>• Acknowledging</li> <li>• Clarifying</li> <li>• Encouraging</li> <li>• Exchanging Information</li> <li>• Exploring</li> <li>• Language</li> <li>• Listening</li> <li>• Summarizing</li> </ul> | <ul style="list-style-type: none"> <li>• Adjusting &amp; Tailoring</li> <li>• Balancing &amp; Flexibility</li> </ul> |

### Approaches of CONCERN

HCPs incorporate patient values and preferences when they demonstrate concern for the patient as a unique individual and as a partner in their own care, and show concern for diseases and their effects on the patient.

This includes **advocating** on a patient's behalf,<sup>61</sup> such as talking to HCP colleagues to get additional insights, making referrals to other specialist, or advocating for second opinions on conditions and treatments.<sup>44</sup>

1  
2  
3  
4  
5  
6 *“Advocates for the patient (includes willingness to circumvent or adapt*  
7  
8 *the system)” and “Physicians’ advocacy within (or around) the health-care*  
9  
10 *system helps patients implement jointly negotiated decisions.”*<sup>61</sup>  
11  
12  
13  
14

15 HCPs use **caring and connecting** behaviors like acting in a sincere,<sup>45</sup> relational,<sup>61</sup> and  
16  
17 empathetic manner, making the patient feel comfortable and creating a safe space to talk,  
18  
19 question, and/or disagree,<sup>33</sup> and using expressive touch.<sup>48</sup> Treating the patient as unique<sup>45</sup>  
20  
21 and seeing the patient’s perspective<sup>48</sup> are also approaches that demonstrate concern which  
22  
23 can include HCPs sharing their own personal experiences, interests, or feelings.<sup>61</sup> HCPs also  
24  
25 show compassion, empathy, and basic human concern<sup>47</sup> without being judgmental.<sup>45</sup> Other  
26  
27 such approaches include remaining present, mindful, and “in the moment”<sup>48</sup> while providing  
28  
29 care for immediate concerns, but also incorporating preventative care to demonstrate  
30  
31 concern for the patient’s overall wellbeing.<sup>34</sup>  
32  
33  
34  
35  
36  
37  
38  
39

40 *“A physician participant highlighted the importance of the physician’s*  
41  
42 *effort to act in a relational way by saying, ‘...Express caring in that*  
43  
44 *interaction – this is what the physician can do. And the quality of that*  
45  
46 *caring is what enhances the intrinsic motivation of the patient to take the*  
47  
48 *responsibility’.”*<sup>61</sup>  
49  
50  
51  
52  
53

54 HCPs also show concern by **empowering** the patient through approaches that value the  
55  
56 individual, enable self-management, and promote patient agency by recognizing, confirming,  
57  
58 and validating patient autonomy<sup>61</sup> and respecting privacy.<sup>45</sup> Empowering also includes  
59  
60

1  
2  
3 creating an environment of equality,<sup>54</sup> establishing trust by sharing control,<sup>61</sup> inviting the  
4  
5 patient to lead<sup>41</sup> or to set the pace<sup>31</sup> in clinical encounters, letting the patient have the final  
6  
7 say in decisions,<sup>45</sup> or providing opportunities to reconsider previous decisions.<sup>54</sup>  
8  
9

10  
11  
12  
13 *“The patient is enabled to keep control of his or her own situation. The*  
14  
15 *patient has authority in the decision-making process.”<sup>45</sup>*  
16  
17

18  
19  
20 HCPs also show concern by **inviting** the involvement of others<sup>38</sup> in clinical decision-making,  
21  
22 such as asking loved ones, family, or caregivers<sup>45</sup> to help the patient make choices, or  
23  
24 seeking input from colleagues, specialists, and other HCPs for advice or second opinions.<sup>61</sup>  
25  
26  
27

28  
29  
30 *“You have to have the team. You have to have the physician buy-in. And*  
31  
32 *often I ask them to bring somebody with them so that there’s somebody*  
33  
34 *else there who can hear the conversation....”<sup>38</sup>*  
35  
36  
37

38  
39  
40 HCPs show concern by **partnering** with the patient<sup>48</sup> by investing time with them,<sup>41</sup>  
41  
42 cultivating mutual respect to form a “therapeutic alliance,”<sup>33</sup> and treating the patient as an  
43  
44 equal partner.<sup>31</sup> Understanding the patient is a key element of partnering<sup>52</sup> as well as taking  
45  
46 a long-term view of the patient's care.  
47  
48

49  
50  
51  
52 *“Partnership process – Strategies to establish and maintain a partnership*  
53  
54 *with the patient.”<sup>48</sup>*  
55  
56  
57  
58  
59  
60

1  
2  
3 HCPs also show concern by **sensing**, i.e. perceiving and acting in a sensitive manner,  
4  
5 including interpersonal sensitivity,<sup>59</sup> cultural sensitivity,<sup>58</sup> or showing respect and  
6  
7 deference for religious beliefs.<sup>33</sup> HCPs also may use intuition in the clinical encounter<sup>59</sup> to  
8  
9 sense patient moods and feelings.  
10  
11  
12  
13  
14

15 *“There are two basic types of interpersonal sensitivity. The first type is*  
16 *simply to notice (and, relatedly, remember) the other person’s*  
17 *appearance, words, or nonverbal behavior.” And “The second, and most*  
18 *commonly investigated, kind of interpersonal sensitivity involves accuracy*  
19 *in interpreting cues.”<sup>59</sup>*  
20  
21  
22  
23  
24  
25  
26  
27  
28  
29

### 30 **Approaches of COMPETENCE**

31  
32  
33

34  
35 HCPs incorporate patient values and preferences when they competently address diseases,  
36  
37 share decision-making, understand and use research evidence, and professionally manage  
38  
39 patient care.  
40  
41  
42  
43  
44

45 Competence includes many behaviors including **decision making**, when HCPs competently  
46  
47 engage with the patient to support, direct, and share decision-making. Shared decision-  
48  
49 making (SDM) was one of the most frequently mentioned approaches to incorporating  
50  
51 patient values and preferences in the records. It is its own discipline in the patient-centered  
52  
53 care paradigm with many adherents and a large body of evidence regarding its use and  
54  
55 effectiveness with several SDM methods and techniques. However, as its name implies, SDM  
56  
57 addresses values integration when making treatment decisions and does not account for the  
58  
59  
60



1  
2  
3 pre- and post-decision-making values and preferences that are important to patients and  
4  
5 HCPs in their overall long-term relationships.  
6  
7  
8  
9

10 *“The physician sharing decision making acknowledges that power is*  
11  
12 *shared and integrates the patient’s preferences into a mutual decision.”*<sup>61</sup>  
13  
14  
15

16  
17 SDM also involves HCP competence with research evidence<sup>54</sup> as well as skills to help  
18 formulate the patient’s stance on issues and options,<sup>51</sup> or to negotiate decisions.<sup>61</sup> HCPs  
19 may also use decision aids or tools to assist the patient in making treatment decisions<sup>39</sup> or  
20 use vivid descriptions,<sup>51</sup> a technique to aid the patient in arriving at their own conclusions.  
21  
22 SDM also includes directing behaviors that involve the HCP giving their own opinion or  
23 recommendation to the patient<sup>46</sup> when asked or when the patient is unable to make a  
24 decision.<sup>33</sup> It also involves listing, an action by HCPs to suggest or “draw out patients’ views  
25 about possible choices.”<sup>54</sup>  
26  
27  
28  
29  
30  
31  
32  
33  
34  
35  
36  
37  
38  
39

40 *“[If] you ask [patients] what they think is wrong with them, then they*  
41  
42 *won’t tell you. But if you give them a list of things that are in your mind,*  
43  
44 *then they will usually identify some of their concerns.”*<sup>54</sup>  
45  
46  
47  
48  
49

50 HCP competence also includes **managing** the patient care process to help achieve mutual  
51 goals without controlling the patient, including working on mutually setting an agenda<sup>41</sup> and  
52 priorities.<sup>48</sup> This also includes negotiating with patients to help them understand, assess,  
53 weigh, and prioritize options,<sup>52</sup> gaining clarity on agreements and disagreements,<sup>61</sup> and  
54 openly discussing the pros and cons of options.<sup>46</sup> All of this is with the intent of eventually  
55  
56  
57  
58  
59  
60

1  
2  
3 gaining agreement on issues, mutual roles, possible solutions, and next steps.<sup>43</sup> Managing  
4  
5 also refers to managing patient emotions which includes efforts to reduce patient anxiety  
6  
7 and distress,<sup>31</sup> exploring and responding to emotions, allowing time for patients to process  
8  
9 emotions, as well as HCPs displaying their own emotions.<sup>47</sup> Managing also involves planning  
10  
11 & preparing behaviors such as action plans for treatment,<sup>37</sup> agreeing on priorities,<sup>48</sup>  
12  
13 arranging follow-ups,<sup>46</sup> and collaborative goal setting.<sup>52</sup> It also includes preparing for the  
14  
15 clinical encounter to maximize the efficiency of time with the patient and readiness to elicit  
16  
17 and incorporate values and preferences.<sup>52</sup>

18  
19  
20  
21  
22  
23  
24  
25 Another competency is to manage the administrative processes that are needed to support  
26  
27 values integration, such as having clear systematic processes for patient encounters and  
28  
29 consultations,<sup>46</sup> using electronic health records (EHR) and other methods of record keeping  
30  
31 to capture and encode patient values and preferences for future access,<sup>48</sup> leaving time for  
32  
33 questions in the encounter,<sup>38</sup> having smooth continuity of care including a system for follow-  
34  
35 up,<sup>56</sup> and collaborative action planning.<sup>41</sup>

36  
37  
38  
39  
40  
41  
42 *“This process involved a significant investment of time, negotiation,*  
43  
44 *deliberation, and shared decision making about the steps towards goal*  
45  
46 *attainment, as well as setting a nominal target.”<sup>41</sup>*

47  
48  
49  
50  
51  
52 Competent management also includes **professionalism**, i.e. approaching the patient in a  
53  
54 professional and honest manner. Honesty, transparency,<sup>38</sup> responsiveness,<sup>45</sup> and a reality-  
55  
56 based approach<sup>43</sup> to the patient play an important role in patient-centered care and values  
57  
58 integration, as well as being consistent with information, care, and decisions.<sup>56</sup>

1  
2  
3  
4  
5  
6 *“Professional responsiveness, Professionalism – Healthcare providers*  
7  
8 *explain what is possible and what is not...Healthcare providers are honest*  
9  
10 *with patients...Healthcare providers do not judge the patient’s*  
11  
12 *situation...Healthcare providers respect the patient’s privacy.”*<sup>45</sup>  
13  
14  
15  
16  
17

## 18 **Approaches of COMMUNICATION**

19  
20  
21  
22  
23 HCPs incorporate patient values and preferences when they successfully communicate with  
24  
25 the patient as a partner, share information and evidence, and manage patient engagement.  
26  
27

28  
29  
30 This includes approaches like **acknowledging** the patient’s efforts to get and stay healthy or  
31  
32 to adhere to treatment plans,<sup>48</sup> as well as expressing support or reassurance for the  
33  
34 patient’s preferences and validating their choices.<sup>53</sup>  
35  
36  
37  
38  
39

40 *“The second component of the practice involves acknowledging specific*  
41  
42 *patient efforts in a genuine and positive manner.”*<sup>48</sup>  
43  
44  
45  
46

47 Values integration through communication also includes **clarifying** the patient’s stances by  
48  
49 checking on the status of their choices, feelings, values, and preferences,<sup>41</sup> framing and  
50  
51 reframing<sup>52</sup> to help clarify their positions, and repeating to reinforce patient preferences.<sup>56</sup>  
52  
53  
54 It also includes revisiting patient decisions over time<sup>43</sup> as patients may change their minds.  
55  
56  
57 Values clarification methods<sup>45</sup> are also described in which HCPs actively engage with the  
58  
59  
60

1  
2  
3 patient to discuss positive and negative characteristics of options to clarify which are most  
4  
5 important to the patient.  
6  
7  
8  
9

10 *“The mutual clarification of values can be a rewarding exercise, as it not*  
11 *only ensures the best possible decision but also demonstrates to patients*  
12 *a genuine interest in incorporating their views.”* <sup>45</sup>  
13  
14  
15  
16  
17  
18  
19

20 Another communication approach is **encouraging** the patient to be active in the process, to  
21 participate in the clinical encounter/conversation, <sup>49</sup> encouraging patient questions, <sup>31</sup> and  
22 patient storytelling. <sup>33</sup> One technique, motivational interviewing, “uses an empathic  
23 nonconfrontational style to increase the motivation for behavior change, engage patients  
24 with treatment, and build therapeutic relationships.” <sup>56</sup>  
25  
26  
27  
28  
29  
30  
31  
32  
33  
34

35 *“By comparison, providers preferring ‘personalized care’ described their*  
36 *approach as encouraging rather than persuasive, and they were more*  
37 *accepting of different priorities and preferences.”* <sup>43</sup>  
38  
39  
40  
41  
42  
43  
44

45 Values integration via communication also includes **exchanging information** including  
46 explaining or defining the clinical problem <sup>46</sup> or sharing necessary biomedical information  
47 with the patient and informing them of the facts of the condition or diagnosis. <sup>39</sup>  
48  
49  
50  
51  
52  
53

54 *“Clinicians emphasized sharing medical information with patients. We*  
55 *observed a few instances during which clinicians also prompted*  
56 *discussion of patients' goals and values. Clinicians reported a clear*  
57  
58  
59  
60

1  
2  
3 *rationale in interviews as to why sharing biomedical information was*  
4  
5 *central for them.”*<sup>39</sup>  
6  
7  
8  
9

10 Information exchange also includes sharing and presenting research evidence,<sup>39</sup> as well as a  
11  
12 willingness to see more information and encouraging patients to seek more information.<sup>61</sup>  
13  
14  
15

16  
17  
18 *“There was a general view that evidence-based information regarding*  
19  
20 *diagnosis and treatment options must be shared with patients during a*  
21  
22 *consultation.”*<sup>31</sup>  
23  
24  
25

26  
27 Information exchange also includes patient education,<sup>60</sup> coaching,<sup>48</sup> tailoring information  
28  
29 for the patient, as well as using teaching aids, written materials,<sup>60</sup> or other educational  
30  
31 interventions.<sup>55</sup> Interviewing & eliciting approaches are other forms of information  
32  
33 exchange and they were the most frequent behaviors described in the records. HCPs use  
34  
35 various approaches to gain information from the patient, including directly eliciting patient  
36  
37 values,<sup>49</sup> preferences,<sup>35</sup> goals,<sup>57</sup> and circumstances,<sup>31</sup> sometimes referred to as patient-  
38  
39 centered clinical interviewing.<sup>34</sup> It also involves getting patients to appraise various  
40  
41 preferences openly and to identify their favored choices.<sup>53</sup>  
42  
43  
44  
45  
46  
47  
48

49 *“...this meant providing current information, risks and benefits, eliciting*  
50  
51 *questions and adjusting information to patients’ needs, being honest*  
52  
53 *about the limits of the physician’s and scientific knowledge, and*  
54  
55 *presenting an opinion.”*<sup>61</sup>  
56  
57  
58  
59  
60

1  
2  
3 Communication also includes **exploring**, asking open-ended questions to better assess  
4  
5 patient values, preferences, and expectations.<sup>34</sup> Studies noted the importance of openly  
6  
7 exploring alternatives with the patient and exploring the clues and cues – verbal and non-  
8  
9 verbal – that patients often provide.<sup>31</sup>  
10  
11  
12  
13  
14

15 *“Explore ideas, fears, and expectations of the problem and possible*  
16 *treatments.” And, “Informants stated that experienced practitioners are*  
17 *continually alert to signals that patients accept the level of involvement*  
18 *being required of them and adapt accordingly.”<sup>54</sup>*  
19  
20  
21  
22  
23  
24  
25  
26  
27

28 Values integration also occurs through **language** when HCPs use tones and techniques such  
29  
30 as deferential, directive, or inviting language,<sup>49</sup> emotion-oriented speech,<sup>47</sup> or common  
31  
32 language, terms, or phrases with patients,<sup>38</sup> all of which can support the patient’s values,  
33  
34 preferences, and autonomy.  
35  
36  
37  
38  
39

40 *“Deferential’ language...physicians did not evaluate each treatment on*  
41 *behalf of the patient. Instead, they used language that minimized their*  
42 *role in the patient’s decision and deferred to the patient’s autonomy.”<sup>49</sup>*  
43  
44  
45  
46  
47  
48  
49

50 HCPs show concern by **listening**, including active listening without interruption<sup>59</sup> or simple  
51  
52 silence as a response to certain patient emotions.<sup>47</sup>  
53  
54  
55  
56

57 *“The most frequently mentioned skill was the ability to listen. Listening to*  
58 *patients was seen as a basic skill to enable ‘assessment of the language*  
59  
60

1  
2  
3 *that patients use in order to pitch information level’ and to ‘encourage*  
4  
5 *discussion by listening to patients’ views without interruption’.”<sup>31</sup>*  
6  
7  
8  
9

10 When HCPs **summarize** information, choices, or next steps for patients, they are also  
11 integrating values. This can be done as written or audio summaries of clinical discussions<sup>60</sup>  
12  
13 or summaries of the encounter<sup>31</sup> at the end of clinical visits to ensure that the HCP and  
14  
15 patient depart with a mutual understanding of the decisions and next steps. This also allows  
16  
17 patients to more easily share information with caregivers or other HCPs.  
18  
19  
20  
21  
22  
23  
24

### 25 **Approaches of CONGRUENCE**

26  
27  
28  
29

30 HCPs incorporate patient values and preferences when they customize and harmonize care  
31 for each patient and balance their overall approach to care considering the patient’s values  
32 and preferences, the best available research evidence, and their own clinical expertise.  
33  
34  
35  
36  
37  
38  
39

40 Specifically, HCPs seek congruence by **adjusting and tailoring** care for each unique patient.

41 HCPs adjust information based on a patient’s needs, values, and preferences,<sup>61</sup> as well as  
42 tailor options for the patient<sup>36</sup> according the many factors that must be considered within  
43 the realm of the research evidence, the patient’s values, and the HCP’s own expertise.  
44  
45  
46  
47  
48  
49  
50  
51

52 *“Identify preferred format and provide tailor-made information...This*  
53 *competence consists of making the correct range of options available and*  
54 *listing them in a logical sequence and in sufficient clarity so that patients*  
55 *perceive the opportunity to take part in the decision.”<sup>54</sup>*  
56  
57  
58  
59  
60

1  
2  
3  
4  
5  
6 HCPs also seek congruence by maintaining **balance & flexibility** regarding patient needs,  
7  
8 values, information, communication style, decision-making, clinical/treatment approaches,  
9  
10 and roles.<sup>50</sup> This also refers to HCP efforts to balance multiple factors such as evidence,  
11  
12 information, issues, mutual needs, shared power and responsibilities for and with the  
13  
14 patient.<sup>56</sup>

15  
16  
17  
18  
19  
20  
21 *“The informants stressed the importance of maintaining flexibility:*  
22  
23 *adherence to the ‘informed choice’ approach was considered ‘another*  
24  
25 *form of paternalism’.”<sup>54</sup>*

## 30 DISCUSSION

31  
32  
33 Incorporating patient values and preferences in health care is critical for patient-centered  
34  
35 care, but it is complex and requires medical knowledge as well as “soft skills” such as social,  
36  
37 psychological, and communication proficiencies.<sup>64</sup> The themes developed in this review  
38  
39 provide a useful model for better understanding, exploring, and teaching this topic. When  
40  
41 plotted on the EBM Triad (figure 3), these themes also provide a useful framework for  
42  
43 operationalizing values integration into evidence-based clinical practice.  
44  
45  
46  
47  
48  
49

50 *Figure 3 – The EBM Triad and Primary Themes of Approaches to Values Integration*

51  
52  
53 (FIGURE 3 HERE)  
54  
55  
56  
57  
58  
59  
60



1  
2  
3 Our findings fit well into the existing EBM discussion and contribute new evidence to this  
4  
5 discussion by identifying and thematically analyzing, for the first time, the specific behaviors  
6  
7 and approaches that practicing HCPs use to integrate patient values and preferences into  
8  
9 everyday clinical care.  
10  
11  
12  
13  
14

15 Previous studies have described the importance of approaches that show concern for  
16  
17 patient autonomy,<sup>32,60</sup> taking feelings seriously,<sup>33</sup> seeing the patient as a person, and  
18  
19 showing concern about their problems, diseases, effects, treatments, and research  
20  
21 evidence,<sup>32, 65-69</sup> as well as advising HCPs to make “statements of concern, empathy, and  
22  
23 reassurance.”<sup>69</sup>  
24  
25  
26  
27  
28  
29

30 Previous studies have also described “the competences of involving patients in healthcare  
31  
32 choices,”<sup>54</sup> the competencies required for shared decision-making,<sup>32</sup> technical  
33  
34 competencies for involving patients,<sup>50</sup> “culturally competent care,”<sup>58</sup> “competencies they  
35  
36 [HCPs] can execute to involve patients in decision making,”<sup>61</sup> and the importance of medical  
37  
38 competency for HCPs.<sup>8</sup>  
39  
40  
41  
42  
43  
44

45 Previous research has also emphasized “provider-patient communication as key to achieving  
46  
47 patient-centered care,”<sup>67</sup> patient-centered<sup>54</sup> and physician-patient communication,<sup>32</sup> and  
48  
49 the importance of skills to “communicate with patients about their treatment options.”<sup>37</sup>  
50  
51  
52  
53

54 Finally, other EBM literature encourages HCPs to ensure that “clinical goals are congruent”  
55  
56 with patient goals,<sup>34</sup> to “achieve congruence in the consultation,”<sup>50</sup> to strive for  
57  
58 “congruency between [the patient’s] preferred and actual involvement in decision making,”  
59  
60

1  
2  
3 66 to seek “congruence between [patient’s] options and their values,” 70 and to find “more  
4  
5 balance between science, clinical expertise, and patient values.” 8  
6  
7  
8  
9

### 10 **Strengths and limitations**

11  
12 This review utilized accepted, thorough, and systematic methodologies and methods for  
13  
14 qualitative synthesis, and included a wide range of databases in the search for records.  
15  
16

17  
18 Authors’ interpretations and participant quotes were included extensively throughout the  
19  
20 review. There remains a possibility that evidence has been missed searching only records  
21  
22 published from 2000 in English, however adherence to robust systematic review methods  
23  
24 helped to minimize this limitation.  
25  
26

27  
28  
29 Although there is a paucity of qualitative studies explicitly on the topic of “integrating” or  
30  
31 “incorporating” patient values and preferences, this review identified records on related  
32  
33 topics such as “patient-centered care,” “implementing shared decision making,” “HCP-  
34  
35 patient communications,” “eliciting goals,” or “managing patient involvement,” and similar.  
36  
37  
38 There were 17 previous reviews on related topics 8, 65-80 which did not qualify for inclusion in  
39  
40 this review. However a forward-backward search of references in those reviews identified  
41  
42 four records already selected for inclusion in this review 44, 49, 54, 57 strengthening confidence  
43  
44  
45 in the robustness of this review and saturation of the topic. The original record search  
46  
47  
48 period between January 2000 and August 2020 is now two years old and, while no other  
49  
50 qualitative systematic review has been published on this topic between August 2020 and  
51  
52  
53 October 2022, it is possible that additional qualitative evidence has been published which is  
54  
55  
56 not included in this review.  
57  
58  
59  
60

1  
2  
3 Double screening is considered best practice for systematic reviews, with single screening  
4 recommended primarily as an “appropriate methodological short cut”<sup>81</sup> for experienced  
5 researchers.<sup>24</sup> We double-screened ten percent of titles/abstracts and included reviewer  
6 discussions and debates to arrive at mutually agreed screening criteria, before single  
7 screening was conducted for the remaining records. One author conducted the initial coding  
8 and further developed themes in discussion with other authors. All authors contributed to  
9 the review, analysis, and interpretation of findings.  
10  
11  
12  
13  
14  
15  
16  
17  
18  
19  
20  
21  
22

23 Rigorous thematic analysis methods were used to synthesize the findings and identify key  
24 themes and ideas across all records. Thematic analysis involves interpretation of other  
25 researchers’ previous interpretations which can present limitations. To minimize this  
26 limitation, we extensively reported direct verbatims and transcripts from HCP participants  
27 and authors when describing concepts, themes, and subthemes to prevent  
28 misinterpretation of the original evidence.  
29  
30  
31  
32  
33  
34  
35  
36  
37  
38  
39

#### 40 **Implications for policy and practice**

41 Integrating patient values and preferences in modern clinical practice is important  
42 and impacts health outcomes.<sup>82</sup> Findings from this review could help improve health  
43 policy, HCP clinical performance, or patient satisfaction and outcomes by describing  
44 specific and practical patient-centered approaches to values integration.  
45  
46  
47  
48  
49  
50  
51  
52  
53

54 These findings can aid the inclusion of values integration in clinical guidelines which so  
55 far has been limited<sup>15</sup> and for which there are few systematic standards.<sup>16</sup> However,  
56 encoding values and preferences into a single guideline has challenges, so individual  
57  
58  
59  
60

1  
2  
3 HCP skills to elicit and incorporate patient values and preferences will always be  
4  
5 necessary.<sup>83</sup>  
6  
7  
8  
9

10 Medical education and training emphasizes patient-centered care and values  
11  
12 integration in theory, but HCPs receive inadequate instruction on the skills needed to  
13  
14 deliver it.<sup>84</sup> This review's primary themes and descriptions of specific approaches  
15  
16 provide a theoretical and practical framework for education and training on this topic.  
17  
18  
19

20  
21  
22 Scope of practice varies for physicians, nurses, allied health professionals, and others,  
23  
24 but this review shows they each have a role in – and something important to  
25  
26 contribute to – values integration. These findings can influence policymakers who  
27  
28 should consider the entire continuum of care and provide training, tools, funding, and  
29  
30 support and encourage values integration at every level of care delivery. These  
31  
32 findings also offer a structure to educate and assess HCPs and organizations as a  
33  
34 whole on values integration beyond the consultation and “throughout the care  
35  
36 delivery at every point.”<sup>85</sup> HCPs and health systems need to consider patient values  
37  
38 and preferences beyond just treatment decisions<sup>86</sup> and this study underscores the  
39  
40 need to be aware of, and skilled at, a number of approaches.  
41  
42  
43  
44  
45  
46  
47  
48  
49

50 This review can inform clinical practice to improve HCP-patient encounters, develop  
51  
52 patient-centered tools, and improve patient outcomes<sup>19</sup> and satisfaction.<sup>20</sup> Advanced  
53  
54 practice providers could benefit from better clinical communications skills<sup>87</sup> and the  
55  
56 approaches described in this review could provide a guide for improvement. Despite  
57  
58 evidence that patient decision aids improve specific outcomes,<sup>88</sup> many HCPs don't  
59  
60

1  
2  
3 use them <sup>89</sup> due to lack of awareness, availability, difficulty of use, or inappropriate  
4  
5 context. Findings from this review could be useful in guiding tool developers to make  
6  
7 and disseminate more effective decision aids.  
8  
9

### 10 11 12 **Future research**

13  
14  
15 The broad themes described in this review provide multiple areas for future study. The  
16  
17 primary themes of Concern, Competence, Communication, and Congruence should be  
18  
19 explored further. While shared decision-making and HCP-patient communication are  
20  
21 already well-represented in the literature, more study is needed on other approaches such  
22  
23 as caring & connecting, planning & preparing, or goals setting, to name a few. Future  
24  
25 research could consider whether the themes described in this review vary, or are more  
26  
27 common, among specific noncommunicable disease groups, HCP types, or care settings.  
28  
29  
30  
31  
32

33  
34  
35 There is significant research in the area of shared decision-making between HCPs and  
36  
37 patients, but very little in the area of values integration outside of the decision making  
38  
39 process. Future research should explore this gap. Future studies could also seek to quantify  
40  
41 many of the qualitative findings from this review to collect evidence on what contributes to  
42  
43 better outcomes. Many of the approaches described from the data and the resulting themes  
44  
45 may be applicable to clinical care for other chronic diseases, but separate independent  
46  
47 studies are encouraged.  
48  
49  
50

51  
52  
53  
54 Finally, the theme of Congruence described in this review – how HCPs tailor, adjust, balance,  
55  
56 and harmonize approaches for each patient – needs more scientific consideration. It is  
57  
58 underrepresented in the published literature, yet it represents the essence of evidence-  
59  
60

1  
2  
3 based medicine: the “conscientious, explicit, and judicious”<sup>90</sup> integration of patient values  
4  
5 and preferences with the best research evidence and clinical expertise.  
6  
7  
8  
9

### 10 **Reflexivity statement**

11  
12 The principal investigator for this review was a part-time graduate student (MT) at the  
13  
14 University of Oxford while residing and working full-time in the U.S. in the pharmaceutical  
15  
16 industry. MT has experience in designing, executing, and analyzing qualitative methods  
17  
18 involving focus groups, interviews, Delphi methods, surveys, and literature/content analysis  
19  
20 for health-related research. MT has authored or co-authored peer-reviewed and published  
21  
22 articles, however, had not previously conducted a systematic review. MT is not a clinician  
23  
24 but has worked with clinicians for more than 25 years in hospital administration, health  
25  
26 education and communications, research, policy, and advocacy.  
27  
28  
29  
30  
31  
32  
33  
34

35 Author GS, living in Canada, has a clinical background, and was also enrolled in the same  
36  
37 Oxford graduate program. Authors AB and CH live in the UK, are both faculty members from  
38  
39 the University of Oxford’s MSc in Evidence-Based Health Care program. Both have academic  
40  
41 and/or clinical backgrounds that include researching, writing, and teaching extensively on  
42  
43 EBM and the role of patient values and preferences. They provided supervision throughout  
44  
45 the review.  
46  
47  
48  
49  
50  
51

### 52 **CONCLUSION**

53  
54 HCPs incorporate patient values and preferences in health care through a variety of  
55  
56 approaches including: **Concern** for the patient as a person as well as diseases and their  
57  
58 effects; **Competence** at skillfully addressing diseases, research evidence, and managing  
59  
60

1  
2  
3 patient care; **Communication** with the patient as a partner, sharing information and  
4  
5 evidence, and productively managing patient encounters; and, **Congruence** to tailor, adjust,  
6  
7 and balance their approaches to overall care for each patient. Themes in this review provide  
8  
9 a novel framework for understanding and addressing values integration in clinical care and  
10  
11 provide useful insights for policymakers, educators, and practitioners.  
12  
13  
14  
15  
16  
17

18 **Contributorship statement** – As principal investigator, MT led the planning, conduct, and  
19 reporting of the study, submitted the manuscript, and is responsible for the overall content.  
20 As research assistant, GS contributed to the conduct of the literature screening and review  
21 as well as provided review and editing of the manuscript. As research supervisors, AMB and  
22 CH contributed to the planning, oversight, and reporting, as well as provided review and  
23 editing of the manuscript.  
24  
25

26 **Competing interests** – CH receives grant funding from the NIHR School of Primary Care  
27 Research. He has received financial remuneration from an asbestos case and given legal  
28 advice on mesh and hormone pregnancy tests cases. He has received expenses and fees for  
29 his media work, for teaching EBM and is also paid for his GP work in NHS out of hours. He  
30 has also received income from the publication of a series of toolkit books and for appraising  
31 treatment recommendations in non-NHS settings. He is Director of CEBM and former editor  
32 in chief of BMJ-EBM. No competing interests for other authors.  
33  
34  
35

36 **Funding** – This research received no specific grant from any funding agency in the public,  
37 commercial, or not-for-profit sectors.  
38  
39

40 **Data sharing statement** – Data are available upon reasonable request. Data sharing not  
41 applicable, no datasets were generated or analyzed for this study. All data are from publicly  
42 available documents, and references are provided should readers wish to look at original  
43 sources.  
44  
45

46 **Ethics approval** – This study does not involve human or animal subjects, ethics approval not  
47 applicable.  
48  
49  
50  
51  
52  
53  
54  
55  
56  
57  
58  
59  
60

## REFERENCES

- 1 Guyatt GH, Haynes RB, Jaeschke RZ, et al. Users' Guides to the Medical Literature: XXV. Evidence-Based Medicine: Principles for Applying the Users' Guides to Patient Care. *JAMA* 2000;284:1290-6 doi:10.1001/jama.284.10.1290.
- 2 Sackett DL, Rosenberg WMC, Gray JAM, et al. Evidence based medicine: what it is and what it isn't. *BMJ* 1996;312:71 doi:10.1136/bmj.312.7023.71.
- 3 Mellis C. Evidence-based medicine: What has happened in the past 50 years?. *J Paediatr Child Health* 2015;51:65-8 doi:10.1111/jpc.12800.
- 4 Gooberman-Hill R. Qualitative approaches to understanding patient preferences. *The Patient: Patient-Centered Outcomes Research* 2012;5:215-23.
- 5 Lee YK, Low WY, Ng CJ. Exploring patient values in medical decision making: a qualitative study. *PLoS One* 2013;8:e80051 doi:10.1371/journal.pone.0080051 [doi].
- 6 Straus SE, Pattani R, Veroniki AA. Evidence-based medicine : how to practice and teach EBM. Edinburgh: Elsevier 2019.
- 7 Llewellyn-Thomas HA, Crump RT. Decision Support for Patients: Values Clarification and Preference Elicitation. *Medical Care Research and Review* 2013;70:50S-79S doi:<http://ezproxy-prd.bodleian.ox.ac.uk:2094/10.1177/1077558712461182>.
- 8 Bastemeijer CM, Voogt L, van Ewijk J,P., et al. What do patient values and preferences mean? A taxonomy based on a systematic review of qualitative papers. *Patient Educ Couns* 2017;100:871-81.



1  
2  
3 9 Fernandez A, Sturmberg J, Lukersmith S, et al. Evidence-based medicine: is it a bridge  
4  
5 too far?. *Health research policy and systems* 2015;13:66 doi:10.1186/s12961-015-0057-  
6  
7  
8 0.

9  
10  
11 10 Kelly MP, Heath I, Howick J, et al. The importance of values in evidence-based  
12  
13 medicine. *BMC medical ethics* 2015;16 doi:10.1186/s12910-015-0063-3.

14  
15  
16  
17 11 Lown BA, Hanson JL, Clark WD. Mutual influence in shared decision making: A  
18  
19 collaborative study of patients and physicians. *Health Expectations: An International*  
20  
21 *Journal of Public Participation in Health Care & Health Policy* 2009;12:160-74.  
22  
23

24  
25  
26 12 Petrisor B, Bhandari M. The hierarchy of evidence: Levels and grades of  
27  
28 recommendation. *Indian J Orthop* 2007;41:11-5 doi:10.4103/0019-5413.30519 [doi].  
29  
30

31  
32 13 Porta M, Greenland S, Burón A. A dictionary of epidemiology. Oxford, England:  
33  
34 Oxford University Press 2014.  
35

36  
37  
38 14 EBM Levels of Evidence. Available at: [https://www.cebm.ox.ac.uk/resources/levels-](https://www.cebm.ox.ac.uk/resources/levels-of-evidence/oxford-centre-for-evidence-based-medicine-levels-of-evidence-march-2009)  
39  
40 [of-evidence/oxford-centre-for-evidence-based-medicine-levels-of-evidence-march-](https://www.cebm.ox.ac.uk/resources/levels-of-evidence/oxford-centre-for-evidence-based-medicine-levels-of-evidence-march-2009)  
41  
42 [2009](https://www.cebm.ox.ac.uk/resources/levels-of-evidence/oxford-centre-for-evidence-based-medicine-levels-of-evidence-march-2009). Accessed September, 2020.  
43  
44  
45

46  
47 15 van DW, Pieterse AH, Koelewijn-van Loon M,S., et al. How can clinical practice  
48  
49 guidelines be adapted to facilitate shared decision making? A qualitative key-informant  
50  
51 study. *BMJ Qual Saf* 2013;22:855 doi:10.1136/bmjqs-2012-001502.  
52  
53  
54  
55  
56  
57  
58  
59  
60

1  
2  
3 16 Zhang Y, Coello PA, Brožek J, et al. Using patient values and preferences to inform  
4  
5 the importance of health outcomes in practice guideline development following the  
6  
7 GRADE approach. *Health and quality of life outcomes* 2017;15:52.  
8  
9

10  
11 17 Noncommunicable diseases. Available at: [https://www.who.int/news-room/fact-](https://www.who.int/news-room/fact-sheets/detail/noncommunicable-diseases)  
12  
13 [sheets/detail/noncommunicable-diseases](https://www.who.int/news-room/fact-sheets/detail/noncommunicable-diseases). Accessed January 20, 2020.  
14  
15

16  
17 18 Finley CR, Chan DS, Garrison S, et al. What are the most common conditions in  
19  
20 primary care?. *Can Fam Physician* 2018;64:832.  
21  
22

23  
24 19 Gluyas H. Patient-centred care: improving healthcare outcomes. *Nurs Stand*  
25  
26 2015;30:50,7; quiz 59 doi:10.7748/ns.30.4.50.e10186 [doi].  
27  
28

29  
30 20 Wolf DM, Lehman L, Quinlin R, et al. Effect of patient-centered care on patient  
31  
32 satisfaction and quality of care. *J Nurs Care Qual* 2008;23:316-21  
33  
34 doi:10.1097/01.NCQ.0000336672.02725.a5 [doi].  
35  
36

37  
38 21 Lockwood D, Munn Z, Porritt K. Qualitative research synthesis: methodological  
39  
40 guidance for systematic reviewers utilizing meta-aggregation. *Int J Evid Based Healthc*  
41  
42 2015;13:179-87.  
43  
44

45  
46 22 Transforming and scaling up health professionals' education and training: World  
47  
48 Health Organization Guidelines. Available at:  
49  
50 [https://www.who.int/publications/i/item/transforming-and-scaling-up-health-](https://www.who.int/publications/i/item/transforming-and-scaling-up-health-professionals%E2%80%99-education-and-training)  
51  
52 [professionals%E2%80%99-education-and-training](https://www.who.int/publications/i/item/transforming-and-scaling-up-health-professionals%E2%80%99-education-and-training). Accessed January, 2020.  
53  
54  
55  
56  
57  
58  
59  
60

1  
2  
3 23 EPPI Reviewer 4 For Systematic Reviews. Available at:

4  
5  
6 <http://epi.ioe.ac.uk/cms/Default.aspx?alias=epi.ioe.ac.uk/cms/er4>. Accessed

7  
8 January, 2020.

9  
10  
11 24 Mahtani KR, Heneghan C, Aronson J. Single screening or double screening for study  
12 selection in systematic reviews?. *BMJ EBM* 2020;25:149-50 doi:10.1136/bmjebm-2019-  
13 111269.

14  
15  
16  
17  
18  
19 25 Lincoln YS, Guba EG. Naturalistic inquiry. Beverly Hills; London: Sage 1985:Chapter  
20 11, p.293.

21  
22  
23  
24  
25 26 Lockwood C, Porrit K, Munn Z, Rittenmeyer L, Salmond S, Bjerrum M, Loveday H,  
27 Carrier J, Stannard D, Aromataris E, Munn Z (Editors). JBI Reviewer's Manual - Chapter  
28 2: Systematic Review of Qualitative Evidence, . *Joanna Briggs Institute (JBI)* 2017.

29  
30  
31  
32  
33  
34 27 Aromataris E, Munn Z (Editors). Joanna Briggs Institute Reviewer's  
35 Manual 2017:Chapter 2.

36  
37  
38 28 NVivo for Qualitative Research. Available at:

39  
40  
41  
42 <https://www.qsrinternational.com/nvivo-qualitative-data-analysis-software/home>.

43  
44  
45 Accessed March, 2020.

46  
47  
48 29 Bryman A. Social research methods. Oxford: Oxford University Press 2012.

49  
50  
51  
52 30 Liberati A, Altman DG, Tetzlaff J, et al. The PRISMA statement for reporting  
53 systematic reviews and meta-analyses of studies that evaluate health care  
54  
55  
56

1  
2  
3 interventions: Explanation and elaboration. *PLoS Medicine* 2009;6

4  
5  
6 doi:10.1371/journal.pmed.1000100.

7  
8  
9 31 Ford S, Schofield T, Hope T. What are the ingredients for a successful evidence-based  
10 patient choice consultation?: A qualitative study. *Soc Sci Med* 2003;56:589-602

11  
12  
13  
14 doi:<http://dx.doi.org/10.1016/S0277-9536%2802%2900056-4>.

15  
16  
17  
18 32 Ford S, Schofield T, Hope T. Barriers to the evidence-based patient choice (EBPC)  
19 consultation. *Patient Educ Couns* 2002;47:179-85 doi:10.1016/S0738-3991(01)00198-7.

20  
21  
22  
23  
24 33 McLeod H. Respect and shared decision making in the clinical encounter, A Video-  
25 Reflexive Ethnography 2017.

26  
27  
28  
29  
30 34 Aita V, McIlvain H, Backer E, et al. Patient-centered care and communication in  
31 primary care practice: what is involved?. *Patient Educ Couns* 2005;58:296-304.

32  
33  
34  
35  
36 35 Davis K, Bellini P, Hagerman C, et al. Physicians' Perceptions of Factors Influencing  
37 the Treatment Decision-making Process for Men With Low-risk Prostate Cancer.

38  
39  
40  
41  
42 *Urology* 2017;107:86-95 doi:<https://dx.doi.org/10.1016/j.urology.2017.02.056>.

43  
44  
45 36 Feiring E, Friis T. Facilitators and barriers to clinicians' use of COPD action plans in  
46 self-management support: A qualitative study. *Patient Educ Couns* 2020;103:693-701

47  
48  
49  
50  
51 doi:<http://dx.doi.org/10.1016/j.pec.2019.11.002>.

52  
53 37 Friedberg MW, Van Busum K, Wexler R, et al. A demonstration of shared decision  
54 making in primary care highlights barriers to adoption and potential remedies. *Health*  
55  
56  
57  
58 *Aff (Millwood )* 2013;32:268 doi:10.1377/hlthaff.2012.1084.

1  
2  
3 38 Golden SE, Thomas CR, Moghanaki D, et al. Dumping the information bucket: A  
4  
5 qualitative study of clinicians caring for patients with early stage non-small cell lung  
6  
7 cancer. *Patient Educ Couns* 2017;100:861-70 doi:10.1016/j.pec.2016.12.023.  
8  
9

10  
11 39 Größ I, McMullen CK. Barriers to eliciting patient goals and values in shared  
12  
13 decision-making breast cancer surgery consultations: An ethnographic and interview  
14  
15 study. *Psycho - Oncology* 2019;28:2233-9 doi:[http://ezproxy-](http://ezproxy-prd.bodleian.ox.ac.uk:2094/10.1002/pon.5212)  
16  
17 [prd.bodleian.ox.ac.uk:2094/10.1002/pon.5212](http://ezproxy-prd.bodleian.ox.ac.uk:2094/10.1002/pon.5212).  
18  
19

20  
21 40 Hisham R, Liew SM, Ng CJ, et al. Rural doctors' views on and experiences with  
22  
23 evidence-based medicine: The FrEEDoM qualitative study. *PLoS ONE* 2016;11:e0152649  
24  
25 doi:<http://dx.doi.org/10.1371/journal.pone.0152649>.  
26  
27  
28

29  
30 41 Salter C, Shiner A, Lenaghan E, et al. Setting goals with patients living with  
31  
32 multimorbidity: qualitative analysis of general practice consultations. *The British journal*  
33  
34 *of general practice : the journal of the Royal College of General Practitioners*  
35  
36 2019;69:e479 doi:10.3399/bjgp19X704129.  
37  
38  
39

40  
41 42 Shepherd HL, Butow PN, Tattersall MHN. Factors which motivate cancer doctors to  
42  
43 involve their patients in reaching treatment decisions. *Patient Educ Couns* 2011;84:229-  
44  
45 35 doi:<https://dx.doi.org/10.1016/j.pec.2010.10.018>.  
46  
47  
48

49  
50 43 Shortus T, Kemp L, McKenzie S, et al. 'Managing patient involvement': provider  
51  
52 perspectives on diabetes decision-making. *Health Expectations* 2013;16.  
53  
54

55  
56 44 Tracy CS, Dantas GC, Upshur REG. Evidence-based medicine in primary care:  
57  
58 qualitative study of family physicians. *BMC Fam Pract* 2003;4:6.  
59  
60

1  
2  
3 45 Van Humbeeck L, Malfait S, Holvoet E, et al. Value discrepancies between nurses and  
4  
5 patients: A survey study. *Nurs Ethics* 2020;27:1044-55

6  
7  
8 doi:<https://dx.doi.org/10.1177/0969733020906595>.

9  
10  
11 46 Vermunt N, Elwyn G, Westert G, et al. Goal setting is insufficiently recognised as an  
12  
13 essential part of shared decision-making in the complex care of older patients: a  
14  
15 framework analysis. *BMC Fam Pract* 2019;20:76 doi:[https://dx.doi.org/10.1186/s12875-](https://dx.doi.org/10.1186/s12875-019-0966-z)

16  
17  
18  
19  
20  
21  
22  
23  
24  
25  
26  
27  
28  
29  
30  
31  
32  
33  
34  
35  
36  
37  
38  
39  
40  
41  
42  
43  
44  
45  
46  
47  
48  
49  
50  
51  
52  
53  
54  
55  
56  
57  
58  
59  
60

[019-0966-z](https://dx.doi.org/10.1186/s12875-019-0966-z).

47 Visser LNC, Schepers S, Tollenaar MS, et al. Patients' and oncologists' views on how  
oncologists may best address patients' emotions during consultations: An interview  
study. *Patient Educ Couns* 2018;101:1223-31 doi:S0738-3991(18)30077-6 [pii].

48 Zulman DM, Haverfield MC, Shaw JG, et al. Practices to foster physician presence  
and connection with patients in the clinical encounter. *JAMA: Journal of the American  
Medical Association* 2020;323:70-81.

49 Chhabra KR, Pollak KI, Lee SJ, et al. Physician communication styles in initial  
consultations for hematological cancer. *Patient Educ Couns* 2013;93:573-8

doi:<https://dx.doi.org/10.1016/j.pec.2013.08.023>.

50 Ford S, Schofield T, Hope T. Observing decision-making in the general practice  
consultation: who makes which decisions?. *Health Expectations* 2006;9.

51 Landmark AMD, Svennevig J, Gulbrandsen P. Negotiating treatment preferences:  
Physicians' formulations of patients' stance. *Soc Sci Med* 2016;149:26-36

doi:<https://dx.doi.org/10.1016/j.socscimed.2015.11.035>.

1  
2  
3 52 Murdoch J, Salter C, Ford J, et al. The "unknown territory" of goal-setting:  
4  
5 Negotiating a novel interactional activity within primary care doctor-patient  
6  
7 consultations for patients with multiple chronic conditions. *Soc Sci Med*  
8  
9 2020;256:113040 doi:<https://dx.doi.org/10.1016/j.socscimed.2020.113040>.

10  
11  
12  
13  
14 53 Pieterse AH, Henselmans I, de Haes, H. C. J. M., et al. Shared decision making:  
15  
16 Prostate cancer patients' appraisal of treatment alternatives and oncologists' eliciting  
17  
18 and responding behavior, an explorative study. *Patient Educ Couns* 2011;85:e251-9  
19  
20 doi:<http://dx.doi.org/10.1016/j.pec.2011.05.012>.

21  
22  
23  
24  
25 54 Elwyn G, Edwards A, Kinnersley P, et al. Shared decision making and the concept of  
26  
27 equipoise: the competences of involving patients in healthcare choices. *Br J Gen Pract*  
28  
29 2000;50:892.

30  
31  
32  
33 55 Kennedy BM, Rehman M, Johnson WD, et al. Healthcare Providers versus Patients'  
34  
35 Understanding of Health Beliefs and Values. *Patient exp j* 2017;4:29-37.

36  
37  
38  
39 56 Paiva D, Abreu L, Azevedo A, et al. Patient-centered communication in type 2  
40  
41 diabetes: The facilitating and constraining factors in clinical encounters. *Health Serv Res*  
42  
43 2019;54:623-35 doi:10.1111/1475-6773.13126 [doi].

44  
45  
46  
47  
48 57 Schulman-Green D, Naik AD, Bradley EH, et al. Goal setting as a shared decision  
49  
50 making strategy among clinicians and their older patients. *Patient Educ Couns*  
51  
52 2006;63:145-51.

53  
54  
55  
56 58 Hart PL, Mareno N. Cultural challenges and barriers through the voices of nurses. *J*  
57  
58 *Clin Nurs* 2014;23:2223-33 doi:10.1111/jocn.12500.

1  
2  
3 59 Hall JA. Clinicians' accuracy in perceiving patients: Its relevance for clinical practice  
4 and a narrative review of methods and correlates. *Patient Educ Couns* 2011;84:319-24  
5  
6  
7  
8 doi:<http://dx.doi.org/10.1016/j.pec.2011.03.006>.  
9

10  
11 60 Jefford M, Tattersall MHN. Informing and involving cancer patients in their own care.  
12  
13  
14 *The lancet oncology* 2002;3:629-37.  
15

16  
17 61 Lown BA, Hanson JL, Clark WD. Mutual influence in shared decision making: A  
18  
19  
20 collaborative study of patients and physicians. *Health Expect* 2009;12:160-74  
21  
22  
23 doi:<http://dx.doi.org/10.1111/j.1369-7625.2008.00525.x>.  
24

25  
26 62 Iedema R, Carroll K, Collier A, et al. Video-reflexive ethnography in health research  
27  
28  
29 and healthcare improvement : theory and application. Boca Raton: CRC Press 2018.  
30

31  
32 63 Dyrbye LN, Varkey P, Boone SL, et al. Physician Satisfaction and Burnout at Different  
33  
34  
35 Career Stages. *Mayo Clin Proc* 2013;88:1358-67  
36  
37  
38 doi:<https://doi.org/10.1016/j.mayocp.2013.07.016>.  
39

40  
41 64 Salloch S, Otte IC, Reinacher-Schick A, et al. Physician perspectives on the impact of  
42  
43  
44 patient preferences and the role of next-of-kin of patients in evidence-based decision-  
45  
46  
47 making: A qualitative interview study from oncology. *Zeitschrift für Evidenz, Fortbildung*  
48  
49  
50 *und Qualität im Gesundheitswesen* 2018;131:46-52.  
51

52 65 Contreary K, Collins A, Rich EC. Barriers to evidence-based physician decision-making  
53  
54  
55 at the point of care: A narrative literature review. *Journal of Comparative Effectiveness*  
56  
57  
58 *Research* 2017;6:51-63 doi:10.2217/ce-2016-0043.  
59  
60



1  
2  
3 66 Covvey JR, Kamal KM, Gorse EE, et al. Barriers and facilitators to shared decision-  
4 making in oncology: a systematic review of the literature. *Supportive Care Cancer*  
5  
6 2019;27:1613-37 doi:<http://dx.doi.org/10.1007/s00520-019-04675-7>.  
7  
8  
9

10  
11 67 Dwamena F, Holmes-Rovner M, Gauden CM, et al. Interventions for providers to  
12 promote a patient-centred approach in clinical consultations. *Cochrane Database Syst*  
13  
14 *Rev* 2012;2012:CD003267 doi:<http://dx.doi.org/10.1002/14651858.CD003267.pub2>.  
15  
16  
17  
18

19  
20 68 Harrington J, Noble LM, Newman SP. Improving patients' communication with  
21 doctors: a systematic review of intervention studies. *Patient Educ Couns* 2004;52:7-16  
22  
23 doi:S073839910300017X [pii].  
24  
25  
26  
27

28  
29 69 Lewin SA, Skea ZC, Entwistle V, et al. Interventions for providers to promote a  
30 patient-centred approach in clinical consultations. *Cochrane Database Syst Rev*  
31  
32 2001:CD003267.  
33  
34  
35

36  
37 70 Stacey D, Legare F, Lewis K, et al. Decision aids for people facing health treatment or  
38 screening decisions. *Cochrane Database Syst Rev* 2017;4:CD001431  
39  
40  
41  
42 doi:10.1002/14651858.CD001431.pub5 [doi].  
43  
44  
45

46  
47 71 Gravel K, Légaré F, Graham ID. Barriers and facilitators to implementing shared  
48 decision-making in clinical practice: a systematic review of health professionals'  
49 perceptions. *Implementation science : IS* 2006;1:16 doi:10.1186/1748-5908-1-16.  
50  
51  
52

53  
54 72 Harrison M, Milbers K, Hudson M, et al. Do patients and health care providers have  
55 discordant preferences about which aspects of treatments matter most? Evidence from  
56  
57  
58  
59  
60

1  
2  
3 a systematic review of discrete choice experiments. *BMJ Open* 2017;7:e014719-014719  
4  
5 doi:10.1136/bmjopen-2016-014719 [doi].  
6  
7

8  
9 73 Johnson RA, Huntley A, Hughes RA, et al. Interventions to support shared decision  
10  
11 making for hypertension: A systematic review of controlled studies. *Health Expectations*  
12  
13 2018;21:1191-207 doi:<http://ezproxy-prd.bodleian.ox.ac.uk:2094/10.1111/hex.12826>.  
14  
15

16  
17 74 Laisaar-Powell RC, Butow PN, Bu S, et al. Physician-patient-companion  
18  
19 communication and decision-making: A systematic review of triadic medical  
20  
21 consultations. *Patient Educ Couns* 2013;91:3-13  
22  
23 doi:<http://dx.doi.org/10.1016/j.pec.2012.11.007>.  
24  
25

26  
27 75 Légaré F, Ratté S, Gravel K, et al. Barriers and facilitators to implementing shared  
28  
29 decision-making in clinical practice: Update of a systematic review of health  
30  
31 professionals' perceptions. *Patient Educ Couns* 2008;73:526-35  
32  
33 doi:<https://doi.org/10.1016/j.pec.2008.07.018>.  
34  
35

36  
37 76 Mangin D, Stephen G, Bismah V, et al. Making patient values visible in healthcare: a  
38  
39 systematic review of tools to assess patient treatment priorities and preferences in the  
40  
41 context of multimorbidity. *BMJ open* 2016;6:e010903.  
42  
43  
44  
45

46  
47 77 Marsh K, Caro J, Hamed A, et al. Amplifying Each Patient's Voice: A Systematic  
48  
49 Review of Multi-criteria Decision Analyses Involving Patients. *Appl Health Econ Health*  
50  
51 *Policy* 2017;15:155-62 doi:10.1007/s40258-016-0299-1.  
52  
53  
54  
55  
56  
57  
58  
59  
60

1  
2  
3 78 Truglio-Londrigan M, Slyer JT. Shared Decision-Making for Nursing Practice: An  
4  
5 Integrative Review. *The open nursing journal* 2018;12:1  
6  
7  
8 doi:10.2174/1874434601812010001.  
9

10  
11 79 Truglio-Londrigan M, Slyer JT, Singleton JK, et al. A qualitative systematic review of  
12  
13 internal and external influences on shared decision-making in all health care settings.  
14  
15  
16 *JBI Libr Syst Rev* 2012;10:4633-46.  
17

18  
19 80 Zwolsman S, Te Pas E, Hooft L, et al. Barriers to GPs' use of evidence-based medicine:  
20  
21 A systematic review. *Br J Gen Pract* 2012;62:e511-21  
22  
23  
24 doi:<http://dx.doi.org/10.3399/bjgp12X652382>.  
25  
26

27  
28 81 Waffenschmidt S, Knelangen M, Sieben W, et al. Single screening versus  
29  
30 conventional double screening for study selection in systematic reviews: a  
31  
32 methodological systematic review.(Report). *BMC Medical Research Methodology*  
33  
34  
35 2019;19 doi:10.1186/s12874-019-0782-0.  
36  
37

38  
39 82 Doyle C, Lennox L, Bell D. A systematic review of evidence on the links between  
40  
41 patient experience and clinical safety and effectiveness. *BMJ Open* 2013;3:e001570  
42  
43  
44 doi:10.1136/bmjopen-2012-001570.  
45

46  
47 83 Lewis DK, Robinson J, Wilkinson E. Factors involved in deciding to start preventive  
48  
49 treatment: qualitative study of clinicians' and lay people's attitudes. *BMJ* 2003;327:841  
50  
51  
52  
53 doi:10.1136/bmj.327.7419.841.  
54  
55  
56  
57  
58  
59  
60

1  
2  
3 84 Henschen BL, Ryan ER, Evans DB, et al. Perceptions of Patient-Centered Care among  
4  
5 First-Year Medical Students. *Teach Learn Med* 2019;31:26-33

6  
7  
8 doi:10.1080/10401334.2018.1468260 [doi].  
9

10  
11 85 Armstrong MJ, Mullins CD. Value Assessment at the Point of Care: Incorporating  
12  
13 Patient Values throughout Care Delivery and a Draft Taxonomy of Patient Values. *Value*  
14  
15 *in Health : The Journal of the International Society for Pharmacoeconomics and*  
16  
17 *Outcomes Research* 2017;20:292.  
18  
19

20  
21  
22 86 Lee YK, Low WY, Ng CJ. Exploring patient values in medical decision making: a  
23  
24 qualitative study. *PloS one* 2013;8.  
25  
26

27  
28 87 Back AL, Fromme EK, Meier DE. Training Clinicians with Communication Skills  
29  
30 Needed to Match Medical Treatments to Patient Values. *J Am Geriatr Soc*  
31  
32 2019;67:S435-41 doi:<https://doi.org/10.1111/jgs.15709>.  
33  
34

35  
36  
37 88 O'connor A. Using patient decision aids to promote evidence-based decision making.  
38  
39 *Evid Based Med* 2001;6:100 doi:10.1136/ebm.6.4.100.  
40  
41

42  
43 89 Brace C, Schmocker S, Huang H, et al. Physicians' Awareness and Attitudes Toward  
44  
45 Decision Aids for Patients With Cancer. *JCO* 2010;28:2286-92  
46  
47  
48 doi:10.1200/JCO.2009.25.2874.  
49

50  
51 90 Sackett DL, Straus S, Richardson W, et al. Evidence-based medicine : how to practice  
52  
53 and teach EBM. Edinburgh: Churchill Livingstone 2000.  
54  
55  
56  
57  
58  
59  
60

1  
2  
3  
4  
5  
6  
7  
8  
9  
10  
11  
12  
13  
14  
15  
16  
17  
18  
19  
20  
21  
22  
23  
24  
25  
26  
27  
28  
29  
30  
31  
32  
33  
34  
35  
36  
37  
38  
39  
40  
41  
42  
43  
44  
45  
46  
47  
48  
49  
50  
51  
52  
53  
54  
55  
56  
57  
58  
59  
60

*Figure 1 – The Evidence-Based Medicine (EBM) Triad*



Figure 1 – The Evidence-Based Medicine (EBM) Triad

220x135mm (144 x 144 DPI)

Figure 2 – PRISMA Flow Diagram

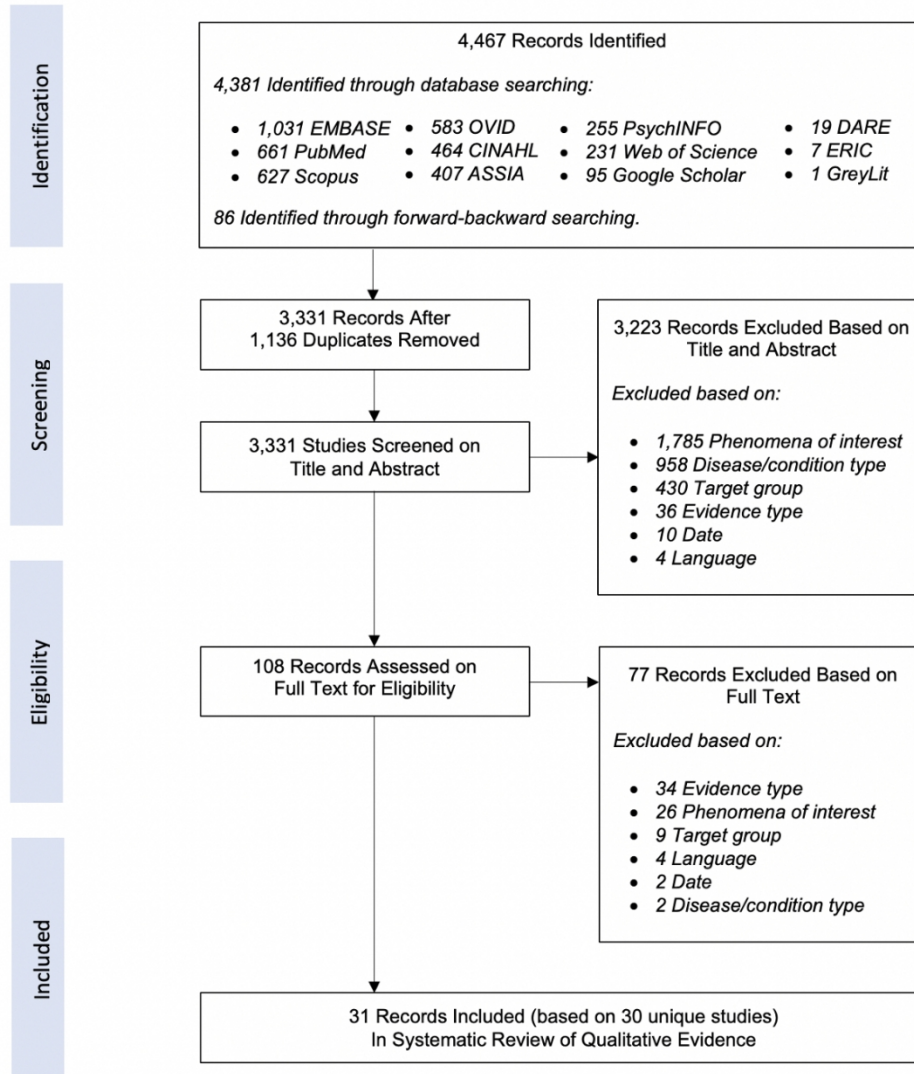

Figure 2 – PRISMA Flow Diagram

219x265mm (144 x 144 DPI)

1  
2  
3  
4  
5  
6  
7  
8  
9  
10  
11  
12  
13  
14  
15  
16  
17  
18  
19  
20  
21  
22  
23  
24  
25  
26  
27  
28  
29  
30  
31  
32  
33  
34  
35  
36  
37  
38  
39  
40  
41  
42  
43  
44  
45  
46  
47  
48  
49  
50  
51  
52  
53  
54  
55  
56  
57  
58  
59  
60

Figure 3 – The EBM Triad and Primary Themes of Approaches to Values Integration

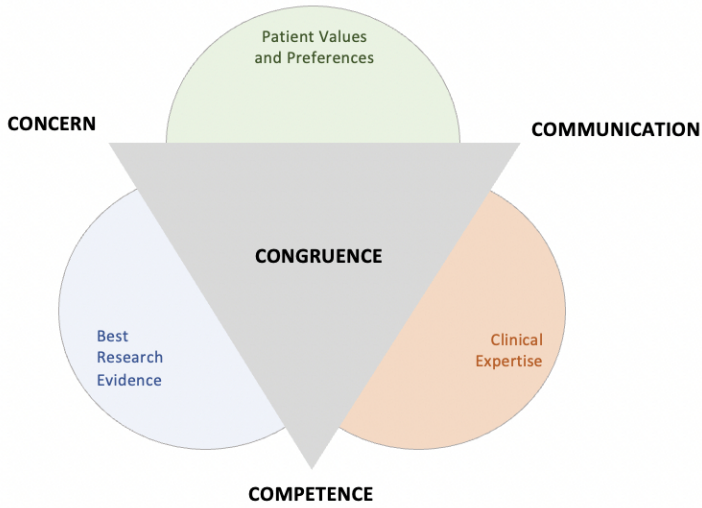

Figure 3 – The EBM Triad and Primary Themes of Approaches to Values Integration  
183x127mm (144 x 144 DPI)

## SUPPLEMENTAL MATERIALS

### Appendix A – Protocol Registration, 11 May 2020

No. [CRD42020166002](https://www.crd.york.ac.uk/prospero/display_record.php?RecordID=166002) – [https://www.crd.york.ac.uk/prospero/display\\_record.php?RecordID=166002](https://www.crd.york.ac.uk/prospero/display_record.php?RecordID=166002)

**NIHR** | National Institute  
for Health Research

**PROSPERO**  
International prospective register of systematic reviews

To enable PROSPERO to focus on COVID-19 submissions, this registration record has undergone basic automated checks for eligibility and is published exactly as submitted. PROSPERO has never provided peer review, and usual checking by the PROSPERO team does not endorse content. Therefore, automatically published records should be treated as any other PROSPERO registration. Further detail is provided [here](#).

#### Citation

Michael Tringale, Genia Stephen, Carl Heneghan, Anne-Marie Boylan. Incorporating patient values and preferences in health care for adults with noncommunicable diseases: A systematic review of qualitative evidence.. PROSPERO 2020 CRD42020166002 Available from: [https://www.crd.york.ac.uk/prospero/display\\_record.php?ID=CRD42020166002](https://www.crd.york.ac.uk/prospero/display_record.php?ID=CRD42020166002)

#### Review question

What are the approaches, barriers, and facilitators that practicing health care professionals (HCPs) experience regarding the integration of patient values and preferences in primary and secondary care for adults with noncommunicable diseases (NCDs)?

#### Searches

This review is concerned with identifying studies regarding HCPs and their experiences incorporating patient values and preferences into their evidence based care (Sackett 1996). Reviewers will use the Joanna Briggs Institute (JBI) search method (Aromataris and Munn 2017) with terms adapted from an initial scoping of electronic databases MEDLINE and CINAHL with an analysis of text from titles, abstracts, and index terms used to describe references. Then, full systematic literature searches will be tailored and conducted for 12 databases including ASSIA, CINAHL, DARE, EMBASE, ERIC, Google Scholar, GreyLit, GreyNet, MEDLINE (via Ovid and PubMed), PsycINFO, Scopus and Web of Science.

#### Types of study to be included

This review will consider studies and other evidence with full text available in English that focus on qualitative data including, but not limited to, designs such as phenomenology, grounded theory, ethnography, action research, other interpretive studies, and methods such as interviews, focus groups, and surveys. Also considered will be mixed-methods studies reporting relevant qualitative data or analysis regarding the topic and population of interest. This review is concerned with current relevant practice so only studies from the year 2000 or later will be included.

#### Condition or domain being studied

This review will consider studies involving care for adults in the four major NCD groups: cancers, cardiovascular diseases, diabetes, and chronic respiratory diseases (WHO 2020).

#### Participants/population

The population of interest is practicing HCPs in primary and secondary care. To the extent that some studies of patient populations may also include relevant HCP data, these studies may be included but only the HCP perspectives will be extracted.

#### Intervention(s), exposure(s)

The population of interest is practicing HCPs in primary and secondary care. To the extent that some studies of patient populations may also include relevant HCP data, these studies may be included but only the HCP perspectives will be extracted.

#### Comparator(s)/control

None

#### Context

This review will consider evidence from non-emergency and non-inpatient settings where clinicians provide primary or secondary care for adults with NCDs.



### Main outcome(s)

- Approaches to integrating patient values and preferences into clinical care.
- Barriers to integrating patient values and preferences into clinical care.
- Facilitators to integrating patient values and preferences into clinical care.
- Thematic analysis, interpretation, and insights.

### Measures of effect

Main outcomes will be presented as qualitative data such as verbatims from, and interpretations of, included studies, as well as an author synthesis and interpretation of the qualitative evidence reviewed.

### Additional outcome(s)

- Practice recommendations for integration of patient values and preferences into evidence based care.
- Further research recommendations.

### Measures of effect

Additional outcomes will be presented as recommendations by the author.

### Data extraction (selection and coding)

Prospective studies will be saved in RefWorks for cataloging and reference management, imported to EPPI Reviewer for screening, and uploaded to NVivo for data extraction and coding. The primary author will screen titles and abstracts for inclusion, with double-screening of a random sample by a secondary reviewer (Taylor-Phillips et al, 2017), with disagreement resolved by discussion or with a third reviewer/advisor. A full text screening will be performed to identify references for final inclusion.

Qualitative data will be extracted from included references using a modified version of the JBI Data Extraction Tool (Aromataris and Munn 2017) to include specific details about the population, context, study methods, the phenomena of interest relevant to the review question. Data will be synthesized using a meta-aggregation approach and a narrative synthesis. Where textual pooling is not possible, findings will be presented in narrative form.

### Risk of bias (quality) assessment

In addition to double-screening references, quality appraisal will be performed by the primary author using the JBI Critical Appraisal Checklist for Qualitative Research (Aromataris and Munn 2017) with a random sample assed by the second reviewer with disagreement resolved by discussion or with a third reviewer/advisor. The CONQual approach (Munn et al, 2014) will also be used wherein an overall ranking will be assigned to rate the confidence of any synthesized qualitative findings which will be presented in a summary of findings table describing the dependability and credibility of each finding.

### Strategy for data synthesis

The data will be analyzed using meta-aggregation and thematic synthesis. Qualitative research findings will be pooled using the coding and synthesis strategies and tools enabled by NVivo including further collection and synthesis of findings to generate a set of statements that represent the aggregation, organization, and categorization of the findings based on similarity in meaning. These categories will then be subjected to further synthesis to produce a single comprehensive set of findings that can be used as the basis for analysis, interpretation, reporting, and recommendations.

### Analysis of subgroups or subsets

Data related to different contexts such as disease severities, prognoses, multimorbidities, and/or HCP types, to the extent that such data will be available in the included studies, may be analyzed as subgroups.

### Contact details for further information

Michael Tringale  
MikeTringale@gmail.com

**Organisational affiliation of the review**

University of Oxford  
[www.ox.ac.uk](http://www.ox.ac.uk)

**Review team members and their organisational affiliations**

Michael Tringale. University of Oxford  
Genia Stephen. University of Oxford  
Dr Carl Heneghan. University of Oxford  
Dr Anne-Marie Boylan. University of Oxford

**Type and method of review**

Narrative synthesis, Synthesis of qualitative studies, Systematic review, Other

**Anticipated or actual start date**

01 February 2020

**Anticipated completion date**

01 December 2020

**Funding sources/sponsors**

Self-funded with a Research Support Grant from Kellogg College, University of Oxford

**Conflicts of interest****Language**

English

**Country**

United States of America

**Stage of review [1 change]**

Review Completed published

**Details of final report/publication(s) or preprints if available [1 change]**

Pre-reviewed, pre-graded, pre-published summary of results and conclusions includes:

Results: From 3331 potential records, 35 met inclusion criteria. Findings comprised: 146 approaches to incorporating patient values and preferences grouped into 18 main themes with 12 subthemes; 92 barriers grouped into 4 main themes with 13 subthemes; 46 facilitators grouped into 5 main themes with 8 subthemes; and, 52 epistemologies related to incorporating patient values and preferences. Four primary concepts summarize all of these findings: Concern, Competence, Communication, and Congruence.

Conclusions: HCPs incorporate patient values and preferences into health care through actions of Concern, Competence, Communication, and Congruence, and there are numerous philosophies that influence how HCPs regard and approach patient values and preferences. HCPs face a number of barriers to incorporating patient values and preferences but they are also facilitated by several factors.

**Subject index terms status**

Subject indexing assigned by CRD

**Subject index terms**

MeSH headings have not been applied to this record

**Date of registration in PROSPERO**

05 July 2020

**Date of first submission**

11 May 2020

Stage of review at time of this submission [2 changes]

| Stage                                                           | Started | Completed |
|-----------------------------------------------------------------|---------|-----------|
| Preliminary searches                                            | Yes     | No        |
| Piloting of the study selection process                         | Yes     | No        |
| Formal screening of search results against eligibility criteria | No      | No        |
| Data extraction                                                 | No      | No        |
| Risk of bias (quality) assessment                               | No      | No        |
| Data analysis                                                   | No      | No        |

*The record owner confirms that the information they have supplied for this submission is accurate and complete and they understand that deliberate provision of inaccurate information or omission of data may be construed as scientific misconduct.*

*The record owner confirms that they will update the status of the review when it is completed and will add publication details in due course.*

Versions

05 July 2020  
18 November 2020  
29 November 2020

## Appendix B – Search Strategy Details

NOTE: Unless otherwise stated, all searches were limited to publication dates 2000 to 2020, English language only. Standard “MeSH” terms ([Medial Subject Headings](#)) established by the National Library of Medicine for use with Medline and other databases were of some use for this review’s search. Main MeSH headings of interest included:

- Communication
- Communication Barrier/s
- Communication Method/s
- Consumer Preference/s
- Decision-Making, Shared
- Evidence-Based Medicine
- Evidence-Based Nursing
- Evidence-Based Practice
- Health Communication
- Implementation Science
- Patient Advocacy
- Patient-Centered Care
- Patient Preference/s
- Patient Participation
- Physician-Patient Relation/s (Relationship/s)
- Professional-Patient Relations

---

### EMBASE – Excerpta Medica DataBASE

<https://www.elsevier.com/solutions/embase-biomedical-research>

(January 2000 to May 2020) 1031 studies identified

*Primary keywords and search string in “advanced search” tool; preselect English only, titles, abstracts and indexed terms:*

1. ((physician\* OR "health professional\*" OR "healthcare professional\*" OR "health care professional\*" OR practitioner\* OR specialist\* OR doctor\* OR nurse\* OR provider\* OR "clinician\*" OR "clinic\* staff") ADJ10 (perspective\* OR attitude\* OR opinion\* OR behavior\* OR behaviour\* OR practices))
2. (integrat\* OR implement\* OR incorporat\* OR consider\* OR promote\* OR use\* OR using OR approach\* OR barrier\* OR facilitate\* OR regard\*) AND ((patient\* OR client\* OR individual\* OR consumer\*) ADJ5 (values OR preferences))
3. (qualitative OR review OR synthesis OR analysis OR narrative OR interview\* OR observation\* OR survey\* OR "focus group\*")
4. (patient NOT (palliative OR "end of life" "end-of-life" OR "advanced directive\*" OR child OR surge\* OR emergenc\* OR resuscitat\* OR terminal\*))
5. 1 and 2 and 3 and 4

### PubMed-Medline

<http://www.pubmed.com/>

(January 2000 to May 2020) 661 studies identified

*Primary keywords and search string in “advanced” search tool; preselect English only, titles, abstracts and indexed terms:*

(((((((((((("physician\*" [Title] OR "health professional\*" [Title]) OR "healthcare professional\*" [Title]) OR "health care professional\*" [Title]) OR "practitioner\*" [Title]) OR "specialist\*" [Title]) OR "doctor\*" [Title]) OR "nurse\*" [Title]) OR "provider\*" [Title]) OR "clinician\*" [Title]) OR ("clinic\*" [All Fields] AND ("staff" [All Fields] OR "staff s" [All Fields]) OR "staffs" [All Fields]))) AND (((("perspective\*" [Title] OR "attitude\*" [Title] OR "opinion\*" [Title] OR "behavior\*" [Title] OR "behaviour\*" [Title] OR (((((((((((("practicability" [All Fields] OR "practicable" [All Fields]) OR "practical" [All Fields]) OR "practicalities" [All Fields]) OR "practicality" [All Fields]) OR "practically" [All Fields]) OR "practicals" [All Fields]) OR "practice" [All Fields]) OR "practice s" [All Fields]) OR "practiced" [All Fields]) OR "practices" [All Fields]) OR "practicing" [All Fields]))) AND (((((((("qualitative" [Title] OR "review" [Title] OR "synthesis" [Title] OR "analysis" [Title] OR "narrative" [Title] OR "interview\*" [Title] OR "observation\*" [Title] OR "survey\*" [Title] OR "focus group\*" [All Fields])) AND (((("patient\*" [Title] OR "client\*" [Title] OR "individual\*" [Title] OR "consumer\*" [All Fields]) AND ("values" [Title] OR (((((((("prefer" [All Fields] OR "preferable" [All Fields]) OR "preferably" [All Fields]) OR "preferred" [All Fields]) OR "preference" [All Fields]) OR "preferences" [All Fields]) OR "preferred" [All Fields]) OR "preferring" [All Fields]) OR "prefers" [All Fields])))

### Scopus

<https://www.elsevier.com/solutions/scopus>

(January 2000 to July 2020) 627 studies identified

*Primary keywords and search string: (NOTE: 147,000 results originally from this string; Scopus provides pre-set search inclusion/exclusion options to choose. To narrow this search I selected publication year range 2000-2020; included only Med, Nursing, Health Professions; only USA, UK, CAN, and the 4 primary NCDs of interested to this study, Oncology, CV, Respiratory, Diabetes.)*

("primary care" OR "specialist care" OR "secondary care") AND (diabetes OR asthma OR cardiovascular OR cancer OR COPD) AND (((((((physician\* OR "health professional\*" OR "healthcare professional\*" OR "health care professional\*" OR practitioner\* OR specialist\* OR doctor\* OR nurse\* OR provider\* OR "clinician\*" OR "clinic\* staff") W/10 (perspective\* OR attitude\* OR opinion\* OR behavior\* OR behaviour\* OR practices)) AND ((integrat\* OR implement\* OR incorporat\* OR consider\* OR promote\* OR use\* OR using OR approach\* OR barrier\* OR facilitate\* OR regard\*) AND ((patient\* OR client\* OR individual\* OR consumer\*) W/5 (values OR preferences)))) AND (qualitative OR review OR synthesis OR analysis OR narrative OR interview\* OR observation\* OR survey\* OR "focus group\*")) AND NOT ("patient-reported" OR "advance planning" OR palliative OR "end of life" "end-of-life" OR "advanced directive\*" OR child OR children OR pediatric OR teen\* OR adolescent\* OR surge\* OR emergenc\* OR resuscitat\* OR terminal\*) AND NOT (patient W/3 (perspective\* OR attitude\* OR opinion\* OR behavior\* OR behavior\* OR understanding OR awareness OR education OR satisfaction))

### OVID-Medline

<https://www.ovid.com/product-details.901.html>

(January 2000 to May 2020) 583 studies identified

*Primary keywords and search string in "advanced search" tool; preselect English only, titles, abstracts and indexed terms:*

1. ((physician\* OR "health professional\*" OR "healthcare professional\*" OR "health care professional\*" OR practitioner\* OR specialist\* OR doctor\* OR nurse\* OR provider\* OR "clinician\*" OR "clinic\* staff") ADJ10 (perspective\* OR attitude\* OR opinion\* OR behavior\* OR behavior\* OR practices))

2. (integrat\* OR implement\* OR incorporat\* OR consider\* OR promote\* OR use\* OR using OR approach\* OR barrier\* OR facilitate\* OR regard\*) AND ((patient\* OR client\* OR individual\* OR consumer\*) ADJ5 (values OR preferences))
3. (qualitative OR review OR synthesis OR analysis OR narrative OR interview\* OR observation\* OR survey\* OR "focus group\*")
4. (patient NOT (palliative OR "end of life" "end-of-life" OR "advanced directive\*" OR child OR surge\* OR emergenc\* OR resuscitat\* OR terminal\*))
5. 1 and 2 and 3 and 4

### CINAHL – Cumulative Index to Nursing and Allied Health Literature

<https://www.ebscohost.com/nursing/products/cinahl-databases/the-cinahl-database>

(January 2000 to July 2020) 464 studies identified after duplicates removed)

*Primary keywords and search string; titles and abstracts:*

((qualitative OR review OR synthesis OR analysis OR narrative OR interview\* OR observation\* OR survey\* OR "focus group\*") AND (physician\* OR "health professional\*" OR "healthcare professional\*" OR "health care professional\*" OR practitioner\* OR specialist\* OR doctor\* OR nurse\* OR provider\* OR "clinician\*" OR "clinic\* staff") AND (perspective\* OR attitude\* OR opinion\* OR behavior\* OR behavior\* OR practices\*) AND (integrat\* OR implement\* OR incorporat\* OR consider\* OR promote\* OR use\* OR using OR approach\* OR barrier\* OR facilitate\* OR regard\*) AND ("patient\* values" OR "patient\* preferences" OR "client\* values" OR "client\* preferences" OR "individual\* values" OR "individual\* preferences" OR "consumer\* values" OR "consumer\* preferences")) NOT (palliative OR "end of life" OR "end-of-life" OR "advanced directive\*" OR child OR surge\* OR emergenc\* OR resuscitat\* OR terminal\*))

### ASSIA – Applied Social Science Index and Abstracts

[https://search.proquest.com/assia?\\_ga=2.36367776.1827441237.1546299943-1531284045.1543164998](https://search.proquest.com/assia?_ga=2.36367776.1827441237.1546299943-1531284045.1543164998)

(January 2000 to July 2020) 407 studies identified

*Primary keywords and search string:*

(ab(((patient NEAR/2 (values OR preferences))) AND ((physician OR doctor OR provider) NEAR/5 (practices OR perspectives OR attitudes OR opinions))) AND qualitative) OR ti((patient AND (values OR preferences)) AND (physician OR doctor OR provider)) OR ti(patient values) OR ((((((physician OR "health professional" OR "healthcare professional" OR "health care professional" OR practitioner OR specialist OR doctor OR nurse OR provider OR "clinician" OR staff) NEAR/10 (perspectives OR attitudes OR opinions OR behavior OR behaviour OR practices)) AND ((integrate OR implement OR incorporate OR consider OR promote OR approaches OR barriers OR facilitate OR facilitators) NEAR/5 ((patient OR client OR individual OR consumer) NEAR/3 (values OR preferences)))) AND (qualitative OR review OR synthesis OR analysis OR narrative OR interviews OR observations OR survey OR "focus groups")) NOT (palliative OR "end of life" "end-of-life" OR "advanced directives" OR child OR surgery OR emergency OR resuscitation OR terminal)) AND pd(20000101-20200630))

### PsychINFO

<https://www.apa.org/pubs/databases/psycinfo/index.aspx>

(January 2000 to July 2020) 255 studies identified

*Primary keywords and search string using "advanced search" tool; limited to abstracts:*

1. ((physician\* OR "health professional\*" OR "healthcare professional\*" OR "health care professional\*" OR practitioner\* OR specialist\* OR doctor\* OR nurse\* OR provider\* OR "clinician\*" OR "clinic\* staff") ADJ10 (perspective\* OR attitude\* OR opinion\* OR behavior\* OR behaviour\* OR practices))
2. (integrat\* OR implement\* OR incorporat\* OR consider\* OR promote\* OR use\* OR using OR approach\* OR barrier\* OR facilitate\* OR regard\*) AND ((patient\* OR client\* OR individual\* OR consumer\*) ADJ5 (values OR preferences))
3. (qualitative OR review OR synthesis OR analysis OR narrative OR interview\* OR observation\* OR survey\* OR "focus group\*")
4. (patient NOT (palliative OR "end of life" "end-of-life" OR "advanced directive\*" OR child OR surge\* OR emergenc\* OR resuscitat\* OR terminal\*))
5. 1 and 2 and 3 and 4

### Web of Science

<http://apps.webofknowledge.com/>

(January 2000 to July 2020) 231 studies identified

#### Primary keywords and search string:

((physician\* OR "health professional\*" OR "healthcare professional\*" OR "health care professional\*" OR practitioner\* OR specialist\* OR doctor\* OR nurse\* OR provider\* OR "clinician\*" OR "clinic\* staff") NEAR/10 (perspective\* OR attitude\* OR opinion\* OR behavior\* OR behavior\* OR practices)) AND ((integrat\* OR implement\* OR incorporat\* OR consider\* OR promote\* OR use\* OR using OR approach\* OR barrier\* OR facilitate\* OR regard\*) NEAR/5 ((patient\* OR client\* OR individual\* OR consumer\*) NEAR/3 (values OR preferences))) AND (qualitative OR review OR synthesis OR analysis OR narrative OR interview\* OR observation\* OR survey\* OR "focus group\*") NOT (palliative OR "end of life" "end-of-life" OR "advanced directive\*" OR child OR surge\* OR emergenc\* OR resuscitat\* OR terminal\*)

### Google Scholar

<https://scholar.google.com/>

(January 2000 to April 2020) 95 studies identified

#### Primary keywords and search strategy:

- Screened for “qualitative” and/or “review”
- Exact phrases "patient values" and/or "patient preferences"
- Must include “physician” “health professional” “doctor” “nurse” or variants
- Also included anything re. various types of cancers or "patient/physician communication & relationship" or "joint/shared decision-making" etc.
- Excluded "end of life" "terminal" "end stage" "directives" "advanced care planning" arthritis, fibromyalgia (non-top NCDs) or resuscitation

### DARE – Database of Abstracts of Reviews for Effectiveness

<https://www.crd.york.ac.uk/CRDWeb/>

(January 2000 to July 2020) 19 studies identified

#### Primary keywords and search string; select DARE database only; publication year 2000 to 2020; search titles only:

((qualitative OR review OR synthesis OR analysis OR narrative OR interview\* OR observation\* OR survey\* OR "focus group\*") AND (physician\* OR "health professional\*" OR "healthcare

1  
2  
3 professional\*" OR "health care professional\*" OR practitioner\* OR specialist\* OR doctor\* OR  
4 nurse\* OR provider\* OR "clinician\*" OR "clinic\* staff") AND (perspective\* OR attitude\* OR  
5 opinion\* OR behavior\* OR behavior\*)  
6  
7

#### 8 **ERIC – Education Resources Information Center**

9 <https://eric.ed.gov/>

10 (January 2000 to July 2020) 7 studies identified  
11

12 *Primary keywords and search string; full text available only:*  
13

14 ("patients values" OR "patients preferences")  
15  
16

#### 17 **GreyLit**

18 <http://greylit.org/>

19 (2000 to 2020) 1 study identified  
20

21 *Primary keywords and search string (note this database was discontinued in 2017, but remains*  
22 *searchable up to that date):*  
23

24 "patients preferences" (6 results) narrowed with additional keyword "values"  
25  
26

#### 27 **Forward-Backward Searches**

28 (January 2000 to August 2020) 86 studies identified  
29  
30  
31  
32  
33  
34  
35  
36  
37  
38  
39  
40  
41  
42  
43  
44  
45  
46  
47  
48  
49  
50  
51  
52  
53  
54  
55  
56  
57  
58  
59  
60



## Appendix C – Appraisal Checklist & Quality Assessment of Included Records



### JBI Critical Appraisal Checklist for Qualitative Research

Reviewer \_\_\_\_\_ Date \_\_\_\_\_

Author \_\_\_\_\_ Year \_\_\_\_\_ Record Number \_\_\_\_\_

|                                                                                                                                                    | Yes                      | No                       | Unclear                  | Not applicable           |
|----------------------------------------------------------------------------------------------------------------------------------------------------|--------------------------|--------------------------|--------------------------|--------------------------|
| 1. Is there congruity between the stated philosophical perspective and the research methodology?                                                   | <input type="checkbox"/> | <input type="checkbox"/> | <input type="checkbox"/> | <input type="checkbox"/> |
| 2. Is there congruity between the research methodology and the research question or objectives?                                                    | <input type="checkbox"/> | <input type="checkbox"/> | <input type="checkbox"/> | <input type="checkbox"/> |
| 3. Is there congruity between the research methodology and the methods used to collect data?                                                       | <input type="checkbox"/> | <input type="checkbox"/> | <input type="checkbox"/> | <input type="checkbox"/> |
| 4. Is there congruity between the research methodology and the representation and analysis of data?                                                | <input type="checkbox"/> | <input type="checkbox"/> | <input type="checkbox"/> | <input type="checkbox"/> |
| 5. Is there congruity between the research methodology and the interpretation of results?                                                          | <input type="checkbox"/> | <input type="checkbox"/> | <input type="checkbox"/> | <input type="checkbox"/> |
| 6. Is there a statement locating the researcher culturally or theoretically?                                                                       | <input type="checkbox"/> | <input type="checkbox"/> | <input type="checkbox"/> | <input type="checkbox"/> |
| 7. Is the influence of the researcher on the research, and vice-versa, addressed?                                                                  | <input type="checkbox"/> | <input type="checkbox"/> | <input type="checkbox"/> | <input type="checkbox"/> |
| 8. Are participants, and their voices, adequately represented?                                                                                     | <input type="checkbox"/> | <input type="checkbox"/> | <input type="checkbox"/> | <input type="checkbox"/> |
| 9. Is the research ethical according to current criteria or, for recent studies, and is there evidence of ethical approval by an appropriate body? | <input type="checkbox"/> | <input type="checkbox"/> | <input type="checkbox"/> | <input type="checkbox"/> |
| 10. Do the conclusions drawn in the research report flow from the analysis, or interpretation, of the data?                                        | <input type="checkbox"/> | <input type="checkbox"/> | <input type="checkbox"/> | <input type="checkbox"/> |

Quality Assessment of Included Records

**Key to JBI Critical Appraisal Checklist for Qualitative Research**

|         |                                                                                                                |
|---------|----------------------------------------------------------------------------------------------------------------|
| JBI-Q1  | Is there congruity between stated philosophical perspective and research methodology?                          |
| JBI-Q2  | Is there congruity between research methodology and research question or objective?                            |
| JBI-Q3  | Is there congruity between the research methodology and the data collection methods?                           |
| JBI-Q4  | Is there congruity between the research methodology and the representation and analysis of data?               |
| JBI-Q5  | Congruity between the research methodology and the interpretation of results.                                  |
| JBI-Q6  | Is there a statement locating the researcher culturally or theoretically?                                      |
| JBI-Q7  | Is the influence of the researcher on the research, and vice-versa, addressed?                                 |
| JBI-Q8  | Are participants voices adequately represented?                                                                |
| JBI-Q9  | Is the research ethical according to current criteria, or evidence of ethical approval by an appropriate body? |
| JBI-Q10 | Do the conclusions flow from the analysis, or interpretation, of the data?                                     |

| Author (Year)              | Ref. | JBI-Q1 | JBI-Q2 | JBI-Q3 | JBI-Q4 | JBI-Q5 | JBI-Q6 | JBI-Q7 | JBI-Q8 | JBI-Q9 | JBI-Q10 |
|----------------------------|------|--------|--------|--------|--------|--------|--------|--------|--------|--------|---------|
| Aita V et al. (2005)       | 36   | Yes    | Yes    | Yes    | Yes    | Yes    | Yes    | No     | Yes    | Yes    | Yes     |
| Chhabra KR et al. (2012)   | 37   | Yes    | Yes    | Yes    | Yes    | Yes    | No     | No     | Yes    | Yes    | Yes     |
| Davis K et al. (2017)      | 38   | Yes    | Yes    | Yes    | Yes    | Yes    | No     | No     | Yes    | Yes    | Yes     |
| Elwyn G et al. (2000)      | 39   | Yes    | Yes    | Yes    | Yes    | Yes    | No     | No     | Yes    | Yes    | Yes     |
| Feiring E et al. (2020)    | 40   | Yes    | Yes    | Yes    | Yes    | Yes    | No     | No     | Yes    | Yes    | Yes     |
| Ford S et al. (2002)       | 32   | Yes    | Yes    | Yes    | Yes    | Yes    | No     | No     | Yes    | Yes    | Yes     |
| Ford S et al. (2003)       | 31   | Yes    | Yes    | Yes    | Yes    | Yes    | No     | No     | Yes    | yes    | Yes     |
| Ford S et al. (2006)       | 41   | Yes    | Yes    | Yes    | Yes    | Yes    | No     | No     | No     | Yes    | Yes     |
| Friedberg MW et al. (2013) | 42   | Yes    | Yes    | Yes    | Yes    | Yes    | Yes    | No     | Yes    | Yes    | Yes     |
| Golden SE et al. (2017)    | 43   | Yes     |
| Gruß I et al. (2019)       | 44   | Yes    | Yes    | Yes    | Yes    | Yes    | Yes    | No     | Yes    | Yes    | Yes     |
| Hall J et al. (2011)       | 45   | Yes    | Yes    | Yes    | Yes    | Yes    | No     | No     | No     | N/A    | Yes     |
| Hart PL et al. (2014)      | 46   | Yes     |
| Hisham R et al. (2016)     | 47   | Yes     |
| Jefford M et al. (2002)    | 48   | Yes    | Yes    | Yes    | Yes    | Yes    | No     | No     | No     | N/A    | Yes     |
| Kennedy BM et al. (2017)   | 49   | Yes     |
| Landmark AM et al. (2016)  | 50   | Yes    | Yes    | Yes    | Yes    | Yes    | No     | No     | Yes    | Yes    | Yes     |
| Lown B et al. (2009)       | 51   | Yes    | Yes    | Yes    | Yes    | Yes    | No     | No     | Yes    | Yes    | Yes     |
| McLeod H et al. (2017)     | 33   | Yes     |
| Murdoch J et al. (2020)    | 52   | Yes    | Yes    | Yes    | Yes    | Yes    | No     | No     | Yes    | Yes    | Yes     |
| Paiva D et al. (2019)      | 53   | Yes    | Yes    | Yes    | Yes    | Yes    | No     | No     | Yes    | Yes    | Yes     |
| Pieterse AH et al. (2011)  | 54   | Yes    | Yes    | Yes    | Yes    | Yes    | No     | No     | Yes    | Yes    | Yes     |

| Author (Year)                   | Ref. | JBI-Q1 | JBI-Q2 | JBI-Q3 | JBI-Q4 | JBI-Q5 | JBI-Q6 | JBI-Q7 | JBI-Q8 | JBI-Q9 | JBI-Q10 |
|---------------------------------|------|--------|--------|--------|--------|--------|--------|--------|--------|--------|---------|
| Salter C et al. (2019)          | 55   | Yes    | Yes    | Yes    | Yes    | Yes    | No     | No     | Yes    | Yes    | Yes     |
| Schulman-Green DJ et al. (2006) | 56   | Yes    | Yes    | Yes    | Yes    | Yes    | No     | No     | Yes    | Yes    | Yes     |
| Shepherd HL et al. (2011)       | 57   | Yes    | Yes    | Yes    | Yes    | Yes    | Yes    | No     | Yes    | Yes    | Yes     |
| Shortus T et al. (2011)         | 58   | Yes     |
| Tracy CS et al. (2003)          | 59   | Yes    | Yes    | Yes    | Yes    | Yes    | No     | Yes    | Yes    | Yes    | Yes     |
| Van Humbeeck et al. (2020)      | 60   | Yes    | Yes    | Yes    | Yes    | Yes    | No     | No     | Yes    | Yes    | Yes     |
| Vermunt N et al. (2019)         | 61   | Yes     |
| Visser LNC et al. (2018)        | 62   | Yes    | Yes    | Yes    | Yes    | Yes    | No     | No     | Yes    | Yes    | Yes     |
| Zulman DM et al. (2020)         | 63   | Yes     |

## Appendix D – Data Extraction Tool

Modified version of the JBI Data Extraction Tool

| Item to be Extracted                                 | Data |
|------------------------------------------------------|------|
| Study ID                                             |      |
| Publication Year                                     |      |
| Title                                                |      |
| Publication                                          |      |
| Study Reference in Full                              |      |
| Study Aim/Objective/Phenomena of Interest            |      |
| Qual Methodology                                     |      |
| Qual Method(s)                                       |      |
| Analytical Approach                                  |      |
| HCP Participant Type                                 |      |
| No. HCP Participants                                 |      |
| Level of HCP Experience                              |      |
| Setting (Clinical Context)                           |      |
| Location (Geography)                                 |      |
| No. Practices/Sites/Clinics                          |      |
| No. Clinical Consultations, Encounters, Interactions |      |
| NCD Category                                         |      |
| Qual Findings                                        |      |
| Author Conclusions                                   |      |
| Reviewer Comments                                    |      |
| Extraction Completed Date                            |      |

## Appendix E – Findings & Citations: Table of Approaches to Values Integration

| Primary Themes               | Subthemes                                              | Healthcare Professional Approaches/Behaviors                                    | Citation(s)                                                                                                                                                                                      |                                                            |
|------------------------------|--------------------------------------------------------|---------------------------------------------------------------------------------|--------------------------------------------------------------------------------------------------------------------------------------------------------------------------------------------------|------------------------------------------------------------|
| <b>Approaches of CONCERN</b> | Advocating                                             | Advocating for the Patient                                                      | Aita, Davis, Elwyn, Ford'02, Ford'03, Lown, Paiva, Tracy                                                                                                                                         |                                                            |
|                              |                                                        | Making Referrals, Seeking Second Opinions                                       | Aita, Chhabra, Ford'06, Friedberg, McLeod, Murdoch, Tracy, Visser                                                                                                                                |                                                            |
|                              | Caring & Connecting                                    | Acting in a Relational Way                                                      | Aita, Lown, Paiva, Zulman                                                                                                                                                                        |                                                            |
|                              |                                                        | Being Genuine/Sincere                                                           | Aita, McLeod, Salter, Shortus, Van Humbeek, Zulman                                                                                                                                               |                                                            |
|                              |                                                        | Comforting/Reassuring/Supporting the Patient                                    | Aita, Feiring, Ford'02, Ford'03, Friedberg, Grub, Hart, Jefford, Kennedy, Landmark, Lown, McLeod, Murdoch, Paiva, Pieterse, Salter, Schulman-Green, Shepherd, Tracy, Van Humbeek, Visser, Zulman |                                                            |
|                              |                                                        | Creating a Safe Space to Talk/Question/Disagree                                 | Chhabra, Elwyn, Feiring, Ford'02, Ford'03, Golden, Grub, Hisham, Jefford, Landmark, Lown, McLeod, Paiva, Pieterse, Salter, Shepherd, Tracy, Van Humbeek                                          |                                                            |
|                              |                                                        | Expressive Touch                                                                | Hall, McLeod, Zulman                                                                                                                                                                             |                                                            |
|                              |                                                        | Focus on Prevention                                                             | Aita, Murdoch                                                                                                                                                                                    |                                                            |
|                              |                                                        | Making the Patient Feel Comfortable                                             | Ford'02, Lown, McLeod, Visser                                                                                                                                                                    |                                                            |
|                              |                                                        | Mindfulness                                                                     | Grub, Lown, McLeod, Zulman                                                                                                                                                                       |                                                            |
|                              |                                                        | Seeing Patient Perspective/Having (vs. "showing/exhibiting/displaying") Empathy | Aita, Davis, Elwyn, Ford'03, Friedberg, Golden, Grub, Hall, Kennedy, Landmark, Lown, McLeod, Murdoch, Paiva, Pieterse, Schulman-Green, Van Humbeek, Vermont, Visser, Zulman                      |                                                            |
|                              |                                                        | Sharing Doctor's Own Personal Experiences, Making the Doctor Approachable       | Kennedy, McLeod                                                                                                                                                                                  |                                                            |
|                              |                                                        | Sharing Personal Interests, Feelings, Experiences                               | Lown, McLeod                                                                                                                                                                                     |                                                            |
|                              |                                                        | Showing/Exhibiting/Displaying (vs. "having") Compassion, Empathy, Caring        | Ford'03, Golden, Grub, Kennedy, Lown, McLeod, Murdoch, Paiva, Van Humbeek, Visser, Zulman                                                                                                        |                                                            |
|                              |                                                        | Showing Curiosity About the Patient/Condition                                   | Hall, Zulman                                                                                                                                                                                     |                                                            |
|                              |                                                        | Treating Patient as a Unique Person/Individual                                  | McLeod, Van Humbeek                                                                                                                                                                              |                                                            |
|                              |                                                        | Valuing Feeling Comfortable                                                     | McLeod, Pieterse, Visser                                                                                                                                                                         |                                                            |
|                              |                                                        | Empowering                                                                      | Enabling Patient Self-Management, Patient Agency                                                                                                                                                 | Chhabra, Feiring, Landmark, McLeod, Murdoch, Paiva, Salter |
|                              |                                                        |                                                                                 | Establishing Equality                                                                                                                                                                            | Elwyn, Ford'03, Lown, McLeod, Murdoch, Van Humbeek         |
|                              | Giving Patient Control, Final Say, Patient Empowerment |                                                                                 | Ford'02, Ford'03, Grub, Kennedy, Lown, McLeod, Murdoch, Salter, Shepherd, Van Humbeek, Visser, Zulman                                                                                            |                                                            |
|                              | Having Patience, Letting the Patient Set the Pace      |                                                                                 | Ford'03, McLeod, Visser                                                                                                                                                                          |                                                            |
|                              | Invites Patient to Lead                                |                                                                                 | McLeod, Salter                                                                                                                                                                                   |                                                            |
|                              | Opportunities to Reconsider                            |                                                                                 | Elwyn, Ford'03, Pieterse                                                                                                                                                                         |                                                            |

| Primary Themes    | Subthemes                       |                 | Healthcare Professional Approaches/Behaviors         | Citation(s)                                                                                                                       |                                                                                                                                                                   |
|-------------------|---------------------------------|-----------------|------------------------------------------------------|-----------------------------------------------------------------------------------------------------------------------------------|-------------------------------------------------------------------------------------------------------------------------------------------------------------------|
|                   |                                 |                 | Recognizing, Confirming, Validating Patient Autonomy | Chhabra, Elwyn, Ford'02, Ford'03, Ford'06, Jeffords, Lown, McLeod, Shortus, Van Humbeeck                                          |                                                                                                                                                                   |
|                   |                                 |                 | Respectful Environments/Clinics/Waiting Rooms        | Aita, Ford'03, McLeod                                                                                                             |                                                                                                                                                                   |
|                   |                                 |                 | Respecting Privacy                                   | Ford'03, McLeod, Van Humbeeck                                                                                                     |                                                                                                                                                                   |
|                   |                                 |                 | Sharing Control Overall                              | Lown, McLeod                                                                                                                      |                                                                                                                                                                   |
|                   |                                 |                 | Trusting/Respecting the Patient                      | Elwyn, Ford'03, Ford'06, Golden, Hart, Kennedy, Lown, McLeod, Paiva, Shortus, Vermont, Zulman                                     |                                                                                                                                                                   |
|                   |                                 |                 | Valuing the Individual Patient                       | Hart, McLeod                                                                                                                      |                                                                                                                                                                   |
|                   | Inviting                        |                 | Invite/Involve Carers/Caregivers                     | Ford'03, Paiva                                                                                                                    |                                                                                                                                                                   |
|                   |                                 |                 | Invite/Involve Family/Loved Ones                     | Chhabra, Davis, Elwyn, Friedberg, Golden, Hart, Lown, Paiva, Salter, Van Humbeeck, Visser, Zulman                                 |                                                                                                                                                                   |
|                   |                                 |                 | Invite/Involve Others                                | Elwyn                                                                                                                             |                                                                                                                                                                   |
|                   |                                 |                 | Seeks Input from Colleagues and Other Experts        | Elwyn, Hisham                                                                                                                     |                                                                                                                                                                   |
|                   | Partnering                      |                 | Develop Partnership with the Patient                 | Aita, Elwyn, Kennedy, McLeod, Zulman                                                                                              |                                                                                                                                                                   |
|                   |                                 |                 | Forms Therapeutic Alliance/Relationship with Patient | McLeod, Paiva                                                                                                                     |                                                                                                                                                                   |
|                   |                                 |                 | Mutual Respect Between Patient and HCP               | Elwyn, Ford'03, McLeod, Paiva, Vermont                                                                                            |                                                                                                                                                                   |
|                   |                                 |                 | Personalizing Approach/Decisions/Care                | Chhabra, Feiring, Friedberg, Jefford, McLeod, Murdoch, Paiva, Salter, Shortus, Van Humbeeck, Zulman                               |                                                                                                                                                                   |
|                   |                                 |                 | Takes the Long-Term View                             | Davis, Golden, Murdoch, Schulman-Green, Shortus                                                                                   |                                                                                                                                                                   |
|                   |                                 |                 | Understanding the Patient                            | Davis, Elwyn, Feiring, Ford'03, Ford'06, McLeod, Friedberg, Golden, Kennedy, Landmark, Lown, Salter, Van Humbeeck, Visser, Zulman |                                                                                                                                                                   |
|                   | Sensing                         |                 | Cultural Sensitivity                                 | Aita, Hart, Kennedy, Lown, McLeod, Shepherd,                                                                                      |                                                                                                                                                                   |
|                   |                                 |                 | Interpersonal Sensitivity, Overall Concern           | Ford'03, Hall, McLeod, Paiva, Pieterse, Zulman                                                                                    |                                                                                                                                                                   |
|                   |                                 |                 | Non-Judgmental                                       | Lown                                                                                                                              |                                                                                                                                                                   |
|                   |                                 |                 | Respect/Include Religion                             | McLeod, Van Humbeeck                                                                                                              |                                                                                                                                                                   |
|                   |                                 |                 | Using Intuition                                      | Tracy                                                                                                                             |                                                                                                                                                                   |
|                   | <b>Approaches of COMPETENCE</b> | Decision Making | Decision Support                                     | Patient Decision Aids/Tools                                                                                                       | Davis, Ford'03, Friedberg, Grub, Jefford, Lown, McLeod, Shortus, Vermont                                                                                          |
|                   |                                 |                 |                                                      | Stories, Vivid Descriptions                                                                                                       | Aita, Ford'03, Landmark, Lown, McLeod, Paiva                                                                                                                      |
|                   |                                 | Directing       |                                                      | Giving an Opinion to the Patient                                                                                                  | Ford'03, Ford'06, Landmark, Lown, McLeod, Tracy                                                                                                                   |
|                   |                                 |                 |                                                      | Listing                                                                                                                           | Elwyn, Salter                                                                                                                                                     |
|                   |                                 |                 |                                                      | Making Recommendations                                                                                                            | Aita, Chhabra, Davis, Feiring, Ford'03, Friedberg, Golden, Kennedy, Landmark, McLeod, Murdoch, Paiva, Pieterse, Schulman-Green, Shepherd, Shortus, Tracy, Vermont |
| Sharing Decisions |                                 |                 | Competence with Research Evidence                    | Elwyn, Ford'02, Ford'06, McLeod                                                                                                   |                                                                                                                                                                   |

| Primary Themes | Subthemes  | Healthcare Professional Approaches/Behaviors | Citation(s)                                                                                                                                                                                                                 |                                                                                                                          |
|----------------|------------|----------------------------------------------|-----------------------------------------------------------------------------------------------------------------------------------------------------------------------------------------------------------------------------|--------------------------------------------------------------------------------------------------------------------------|
|                |            | Formulating the Patient's Stance/Priorities  | Grub, Landmark, Murdoch                                                                                                                                                                                                     |                                                                                                                          |
|                |            | Negotiate Decisions                          | Aita, Elwyn, Ford'03, Hall, Landmark, Lown, McLeod, Murdoch, Paiva, Salter, Shepherd, Shortus, Tracy, Vermont                                                                                                               |                                                                                                                          |
|                |            | Shared Decision-Making (SDM)                 | Chhabra, Davis, Elwyn, Ford'02, Ford'03, Ford'06, Friedberg, Golden, Grub, Hall, Jefford, Landmark, Lown, McLeod, Murdoch, Paiva, Pieterse, Salter, Schulman-Green, Shepherd, Shortus, Van Humbeek, Vermont, Visser, Zulman |                                                                                                                          |
|                |            | Understanding Diseases/Treatments            | Ford'03, Davis, Elwyn, Feiring, Golden, Grub, Kennedy, McLeod                                                                                                                                                               |                                                                                                                          |
|                | Managing   | Agenda Setting                               | Ford'06, McLeod, Murdoch, Salter, Shortus, Zulman                                                                                                                                                                           |                                                                                                                          |
|                |            |                                              | Mutually Set Priorities                                                                                                                                                                                                     | Aita, Lown, McLeod, Murdoch, Salter, Shortus, Vermont, Zulman                                                            |
|                |            | Emotions                                     | Anxiety (Prevent, Recognize or Reduce)                                                                                                                                                                                      | Chhabra, Davis, Elwyn, Feiring, Ford'03, Golden, Hall, Jefford, Landmark, Salter, Shepherd, Tracy, Visser, Zulman        |
|                |            |                                              | Distress Management                                                                                                                                                                                                         | Chhabra, Golden, Hall, Jefford, Kennedy, McLeod, Paiva, Visser, Zulman                                                   |
|                |            |                                              | Processing Emotions                                                                                                                                                                                                         | Hall, Landmark, Lown, McLeod, Paiva, Visser, Zulman                                                                      |
|                |            | Negotiating                                  | Assess, Evaluate Treatment Options                                                                                                                                                                                          | Davis, Friedberg, Golden, Grub, McLeod, Murdoch, Pieterse, Salter, Shepherd, Vermont                                     |
|                |            |                                              | Deliberate, Weigh, Negotiate Options                                                                                                                                                                                        | Davis, Elwyn, Ford'03, Friedberg, Golden, Grub, Landmark, McLeod, Pieterse, Shepherd                                     |
|                |            |                                              | Contesting Patient Understanding/Responses                                                                                                                                                                                  | Murdoch, Pieterse, Salter                                                                                                |
|                |            |                                              | Discuss Pros/Cons of Options                                                                                                                                                                                                | Chhabra, McLeod, Shepherd, Van Humbeek, Vermont                                                                          |
|                |            |                                              | Giving, Outlining, Providing Options                                                                                                                                                                                        | Davis, Chhabra, Elwyn, Ford'02, Ford'03, Friedberg, Golden, Grub, Jefford, McLeod, Pieterse, Shortus, Tracy, Van Humbeek |
|                |            |                                              | Handling Agreement & Disagreement                                                                                                                                                                                           | Chhabra, Landmark, Lown, McLeod, Pieterse, Schulman-Green, Shortus                                                       |
|                |            |                                              | Mutual Agreement                                                                                                                                                                                                            | Pieterse                                                                                                                 |
|                |            |                                              | Negotiate Roles/Responsibilities of Patient and HCP                                                                                                                                                                         | Elwyn, Lown, Murdoch, Salter, Shepherd                                                                                   |
|                |            | Planning & Preparing                         | Action Plans                                                                                                                                                                                                                | Elwyn, Feiring, Murdoch, Salter, Vermont                                                                                 |
|                |            |                                              | Agreeing on Priorities                                                                                                                                                                                                      | Aita, McLeod, Ford'06, Lown, Murdoch, Salter, Shortus, Van Humbeek, Vermont, Zulman                                      |
|                |            |                                              | Arranging Follow-Up                                                                                                                                                                                                         | Elwyn, Ford'03, Ford'06, Golden, Landmark, Lown, McLeod, Salter, Shepherd, Vermont                                       |
|                |            |                                              | Mutual Planning                                                                                                                                                                                                             | McLeod, Paiva, Salter, Schulman-Green, Shortus                                                                           |
|                |            |                                              | Collaborative Goal Setting                                                                                                                                                                                                  | Murdoch, Paiva, Salter, Vermont                                                                                          |
|                |            |                                              | Prepare for the Consultation                                                                                                                                                                                                | Ford'03, Salter, Shortus Zulman                                                                                          |
|                |            |                                              | Preparing for Personalization                                                                                                                                                                                               | Shortus, Zulman                                                                                                          |
|                | Processing | Actively Manage the Patient's Involvement    | Shortus                                                                                                                                                                                                                     |                                                                                                                          |
|                |            | Allowing/Investing Time                      | Friedberg, Lown, McLeod, Salter                                                                                                                                                                                             |                                                                                                                          |
|                |            | Coordination/Continuity of Care              | Aita, Davis, Feiring, Ford'03, Friedberg, Landmark, McLeod, Salter                                                                                                                                                          |                                                                                                                          |

| Primary Themes                                                     | Subthemes                          | Healthcare Professional Approaches/Behaviors                        | Citation(s)                                                                                                         |                                                                         |
|--------------------------------------------------------------------|------------------------------------|---------------------------------------------------------------------|---------------------------------------------------------------------------------------------------------------------|-------------------------------------------------------------------------|
|                                                                    |                                    | Don't Rush, Take Time                                               | <i>Ford'03, Lown, McLeod, Schulman-Green</i>                                                                        |                                                                         |
|                                                                    |                                    | EHR, Recording, Record-Keeping Documenting                          | <i>For'02, Friedberg, Hisham, Jefford, McLeod, Zulman</i>                                                           |                                                                         |
|                                                                    |                                    | Following-Up                                                        | <i>Davis, Elwyn, Feiring, Ford'03, Ford'06, Golden, Landmark, McLeod, Pieterse, Vermont</i>                         |                                                                         |
|                                                                    |                                    | Keeps a Long-Term Focus                                             | <i>David, Murdoch, Schulman-Green, Shortus</i>                                                                      |                                                                         |
|                                                                    |                                    | Leaving Time for Questions                                          | <i>Golden</i>                                                                                                       |                                                                         |
|                                                                    |                                    | Systematic Process, Stages, Approaches to the Consultation and Care | <i>Vermont</i>                                                                                                      |                                                                         |
|                                                                    | Professionalism                    | Being Consistent with Information/Care/Decisions                    | <i>Paiva, Vermont</i>                                                                                               |                                                                         |
|                                                                    |                                    | Honesty and Transparency                                            | <i>Feiring, Ford'03, Golden, Jefford, Lown, McLeod, Shortus, Van Humbeeck</i>                                       |                                                                         |
|                                                                    |                                    | Responsiveness                                                      | <i>Aita, Jefford, McLeod, Pieterse, Shepherd, Shortus, Van Humbeeck, Vermont</i>                                    |                                                                         |
|                                                                    |                                    | Realistic Approach the Patient, Care                                | <i>Aita, Jefford, Murdoch, Pieterse, Salter, Shortus, Tracy</i>                                                     |                                                                         |
|                                                                    | <b>Approaches of COMMUNICATION</b> | Acknowledging                                                       | Acknowledging Patient's Role, Effort                                                                                | <i>Ford'03, Grub, Hart, Lown, McLeod, Murdoch, Visser, Zulman</i>       |
|                                                                    |                                    |                                                                     | Celebrating Successes                                                                                               | <i>McLeod, Zulman</i>                                                   |
|                                                                    |                                    |                                                                     | Legitimizing Personal Preferences, Validating the Patient                                                           | <i>Landmark, Lown, McLeod, Murdoch, Pieterse, Salter, Tracy, Zulman</i> |
| Reassurances                                                       |                                    |                                                                     | <i>Ford'03, Kennedy, Landmark, McLeod, Pieterse, Salter, Tracy, Van Humbeeck, Visser, Zulman</i>                    |                                                                         |
| Showing Own Emotions                                               |                                    |                                                                     | <i>Hall, Landmark, Lown, McLeod, Visser, Zulman</i>                                                                 |                                                                         |
| Showing Understanding                                              |                                    |                                                                     | <i>Chhabra, Davis, Elwyn, Fore'03, Grub, Jefford, Kennedy, Landmark, Lown, McLeod, Murdoch</i>                      |                                                                         |
| Valuing, Acknowledging, Validating, Responding to Patient Emotions |                                    |                                                                     | <i>Aita, Chhabra, Feiring, Ford'02, Ford'03, Grub, Hall, Jefford, Landmark, Lown, McLeod, Paiva, Visser, Zulman</i> |                                                                         |
| Clarifying                                                         |                                    | Checking, Rechecking                                                | <i>Elwyn, Ford'03, Ford'06, Landmark, Murdoch, Paiva, Pieterse</i>                                                  |                                                                         |
|                                                                    |                                    | Clarifying Values, Preferences, Views                               | <i>Elwyn, Ford'03, Friedberg, Landmark, Lown, Murdoch, Pieterse, Vermont</i>                                        |                                                                         |
|                                                                    |                                    | Framing & Reframing                                                 | <i>Elwyn, Golden, Landmark, McLeod, Murdoch, Vermont, Zulman</i>                                                    |                                                                         |
|                                                                    |                                    | Repeating                                                           | <i>Paiva, Pieterse</i>                                                                                              |                                                                         |
|                                                                    |                                    | Revisiting (Decisions Over Time)                                    | <i>McLeod, Shortus</i>                                                                                              |                                                                         |
| Encouraging                                                        |                                    | Approving/Amplifying Patient Appraisals/Choices                     | <i>Pieterse</i>                                                                                                     |                                                                         |
|                                                                    |                                    | Encouraging/Inviting Patient Comments/Questions                     | <i>Chhabra, Fored'03, Jefford, Hisham, Landmark, McLeod, Murdoch, Pieterse, Salter</i>                              |                                                                         |
|                                                                    |                                    | Encouraging Patient to Prepare                                      | <i>Murdoch, Salter</i>                                                                                              |                                                                         |
|                                                                    |                                    | Encouraging Storytelling                                            | <i>McLeod</i>                                                                                                       |                                                                         |
|                                                                    |                                    | Inviting Patient Participation                                      | <i>Chhabra, McLeod, Pieterse, Salter</i>                                                                            |                                                                         |
|                                                                    |                                    | Motivational Interviewing                                           | <i>McLeod, Paiva, Zulman</i>                                                                                        |                                                                         |



| Primary Themes                                          | Subthemes                     | Healthcare Professional Approaches/Behaviors                                         | Citation(s)                                                                                                                                                                              |                                                                                                                                                                                                                                                    |
|---------------------------------------------------------|-------------------------------|--------------------------------------------------------------------------------------|------------------------------------------------------------------------------------------------------------------------------------------------------------------------------------------|----------------------------------------------------------------------------------------------------------------------------------------------------------------------------------------------------------------------------------------------------|
|                                                         | Exchanging Information        | Defining                                                                             | Explain, Define, Describe the Problem for Patient                                                                                                                                        | <i>Elwyn, Ford'03, Kennedy, Vermont</i>                                                                                                                                                                                                            |
|                                                         |                               |                                                                                      | Inform Patient of Condition/Diagnosis/Biomedical                                                                                                                                         | <i>Aita, Ford'03, Grub, McLeod, Murdoch, Salter, Schulman-Green, Shortus</i>                                                                                                                                                                       |
|                                                         |                               | Educating                                                                            | Coaching                                                                                                                                                                                 | <i>Jeffords, Zulman</i>                                                                                                                                                                                                                            |
|                                                         |                               |                                                                                      | Information Giving                                                                                                                                                                       | <i>Golden, Grub, Jefford, McLeod, Paiva, Van Humbeek, Visser</i>                                                                                                                                                                                   |
|                                                         |                               |                                                                                      | Information/Education Aids, Materials, Tools                                                                                                                                             | <i>Davis, Golden, Jefford, McLeod, Zulman</i>                                                                                                                                                                                                      |
|                                                         |                               |                                                                                      | Patient Education                                                                                                                                                                        | <i>Chhabra, Davis, Feiring, Friedberg, Vermont</i>                                                                                                                                                                                                 |
|                                                         |                               |                                                                                      | Sharing Knowledge with the Patient                                                                                                                                                       | <i>Ford'03, Golden, McLeod, Paiva</i>                                                                                                                                                                                                              |
|                                                         |                               | Interviewing & Eliciting                                                             | Eliciting Goals                                                                                                                                                                          | <i>Aita, Chhabra, Grub, Lown, McLeod, Murdoch, Salter, Schulman-Green, Shortus, Vermont, Zulman</i>                                                                                                                                                |
|                                                         |                               |                                                                                      | Eliciting Patient Appraisals (Strengths of Preferences)                                                                                                                                  | <i>Pieterse</i>                                                                                                                                                                                                                                    |
|                                                         |                               |                                                                                      | Eliciting Preferences                                                                                                                                                                    | <i>Chhabra, Davis, Elwyn, Ford'02, Ford'03, Ford'06, Friedberg, Golden Grub, Hart, Hisham, Jefford, Kennedy, Landmark, Lown, McLeod, Murdoch, Pieterse, Salter, Schulman-Green, Shepherd, Shortus, Tracy, Van Humbeek, Vermont, Visser, Zulman</i> |
|                                                         | Eliciting Values              |                                                                                      | <i>Aita, Chhabra, Davis, Elwyn, Ford'02, Ford'03, Friedberg, Golden, Grub, Hart, Hall, Hisham, Kennedy, Landmark, Lown, McLeod, Murdoch, Schulman-Green, Tracy, Van Humbeek, Vermont</i> |                                                                                                                                                                                                                                                    |
|                                                         | Eliciting Circumstances       |                                                                                      | <i>Aita, Salter, Schulman-Green, Tracy, Zulman</i>                                                                                                                                       |                                                                                                                                                                                                                                                    |
|                                                         | Eliciting Patient Feelings    |                                                                                      | <i>Feiring, Golden, Hall, Landmark, Lown, McLeod, Pieterse, Visser</i>                                                                                                                   |                                                                                                                                                                                                                                                    |
|                                                         | Patient-Centered Interviewing |                                                                                      | <i>Aita, Paiva, Vermont, Zulman</i>                                                                                                                                                      |                                                                                                                                                                                                                                                    |
|                                                         | Presenting Evidence           | Discussing Risks/Benefits/Side-Effects/Trade-Offs                                    | <i>Chhabra, Elwyn, Ford'02, Ford'03, Friedberg, Golden, Jefford, Lown, McLeod, Paiva, Pieterse, Shepherd, Vermont</i>                                                                    |                                                                                                                                                                                                                                                    |
|                                                         |                               | Presenting, Sharing, Explaining Evidence                                             | <i>Ford'03, Friedberg, Grub, McLeod, Pieterse, Tracy, Vermont</i>                                                                                                                        |                                                                                                                                                                                                                                                    |
|                                                         |                               | Willingness to See More Information, Encourages Patient to Look for More Information | <i>Ford'03, Jefford, Lown, Visser</i>                                                                                                                                                    |                                                                                                                                                                                                                                                    |
|                                                         | Exploring                     | Asking Questions                                                                     | <i>Chhabra, Ford'02, Ford'03, Jefford, McLeod</i>                                                                                                                                        |                                                                                                                                                                                                                                                    |
|                                                         |                               | Assessing Values, Preferences, Expectations                                          | <i>Ford'03, Grub, Landmark, Shepherd</i>                                                                                                                                                 |                                                                                                                                                                                                                                                    |
|                                                         |                               | Explore Ideas, Perspective, Alternatives                                             | <i>Elwyn, Landmark, Shepherd, Visser</i>                                                                                                                                                 |                                                                                                                                                                                                                                                    |
|                                                         |                               | Explore Cues and Clues (Verbal and Non-Verbal)                                       | <i>Chhabra, Elwyn, Ford'03, Hall, Kennedy, McLeod, Salter, Visser, Zulman</i>                                                                                                            |                                                                                                                                                                                                                                                    |
| Explore Fears, Concerns, Distresses, Emotions           |                               | <i>Elwyn, Ford'02, Ford'03, Ford'06, Golden, Lown, Salter, Visser, Zulman</i>        |                                                                                                                                                                                          |                                                                                                                                                                                                                                                    |
| Signaling (Pausing, Thinking Out Loud, Non-Verbal Cues) |                               | <i>Chhabra, Elwyn, Jefford, Hall, McLeod, Murdoch, Pieterse, Visser, Zulman</i>      |                                                                                                                                                                                          |                                                                                                                                                                                                                                                    |
| Language                                                | Deferential Language          | <i>Chhabra</i>                                                                       |                                                                                                                                                                                          |                                                                                                                                                                                                                                                    |
|                                                         | Directive Language            | <i>Ford'02</i>                                                                       |                                                                                                                                                                                          |                                                                                                                                                                                                                                                    |

| Primary Themes                  | Subthemes               | Healthcare Professional Approaches/Behaviors                      | Citation(s)                                                                                                       |
|---------------------------------|-------------------------|-------------------------------------------------------------------|-------------------------------------------------------------------------------------------------------------------|
|                                 |                         | Emotion-Oriented Speech                                           | Visser                                                                                                            |
|                                 |                         | Use Common Language, No Jargon                                    | Lown, Paiva, Pieterse                                                                                             |
|                                 |                         | Using Inviting Language                                           | Chhabra                                                                                                           |
|                                 |                         | Variations in Tone of Voice                                       | Hall, McLeod, Visser, Zulman                                                                                      |
|                                 | Listening               | Active Listening, Without Interruption                            | Elwyn, Ford'03, Ford'06, Hall, Landmark, Lown, McLeod, Paiva, Salter, Zulman                                      |
|                                 |                         | Silence, Attentive or As a Response to Emotion                    | Visser, Zulman                                                                                                    |
|                                 | Summarizing             | Highlight/Repeat Patient's Appraisal/Choice                       | Pieterse                                                                                                          |
|                                 |                         | Providing Summaries to the Patient (Written or Audio)             | Hart, Jefford                                                                                                     |
|                                 |                         | Summarizing in the Encounter                                      | Landmark                                                                                                          |
| <b>Approaches of CONGRUENCE</b> | Adjusting & Tailoring   | Adjust Approach Based on Patient's Needs, Values, Preferences     | Ford'03, Hall, Jefford, Lown, Paiva, Visser, Zulman                                                               |
|                                 |                         | Tailor Options for the Patient                                    | Elwyn, Feiring, Ford'03, Friedberg, Golden, Hart, McLeod, Paiva, Pieterse, Shepherd, Shortus, Van Humbeek, Zulman |
|                                 | Balancing & Flexibility | Flexibility In Overall Approach to Care                           | Aita, Elwyn, Ford'02, Ford'03, Ford'06, McLeod, Shortus, Tracy, Van Humbeek, Vermont, Visser                      |
|                                 |                         | Balancing Information, Issues, Needs, Power, and Responsibilities | Ford'03, Friedberg, Golden, Grub, Hisham, Jefford, Lown, McLeod, Paiva, Pieterse, Salter, Shortus                 |

## ENTRQ Reporting Checklist for *Tringale, Michael et al, bmjopen-2002-067268*

<https://www.equator-network.org/reporting-guidelines/entreq/>

| No | Item                       | Guide and description                                                                                                                                                                                                                                                                                                                                                                                    | Reported on Page      |
|----|----------------------------|----------------------------------------------------------------------------------------------------------------------------------------------------------------------------------------------------------------------------------------------------------------------------------------------------------------------------------------------------------------------------------------------------------|-----------------------|
| 1  | Aim                        | State the research question the synthesis addresses.                                                                                                                                                                                                                                                                                                                                                     | p. 8                  |
| 2  | Synthesis methodology      | Identify the synthesis methodology or theoretical framework which underpins the synthesis, and describe the rationale for choice of methodology (e.g. meta-ethnography, thematic synthesis, critical interpretive synthesis, grounded theory synthesis, realist synthesis, meta-aggregation, meta-study, framework synthesis).                                                                           | P. 8                  |
| 3  | Approach to searching      | Indicate whether the search was pre-planned (comprehensive search strategies to seek all available studies) or iterative (to seek all available concepts until they theoretical saturation is achieved).                                                                                                                                                                                                 | p. 9                  |
| 4  | Inclusion criteria         | Specify the inclusion/exclusion criteria (e.g. in terms of population, language, year limits, type of publication, study type).                                                                                                                                                                                                                                                                          | pp. 9-10              |
| 5  | Data sources               | Describe the information sources used (e.g. electronic databases (MEDLINE, EMBASE, CINAHL, psycINFO, Econlit), grey literature databases (digital thesis, policy reports), relevant organisational websites, experts, information specialists, generic web searches (Google Scholar) hand searching, reference lists) and when the searches conducted; provide the rationale for using the data sources. | P. 9                  |
| 6  | Electronic Search strategy | Describe the literature search (e.g. provide electronic search strategies with population terms, clinical or health topic terms, experiential or social phenomena related terms, filters for qualitative research, and search limits).                                                                                                                                                                   | P. 9 and Appendix B   |
| 7  | Study screening methods    | Describe the process of study screening and sifting (e.g. title, abstract and full text review, number of independent reviewers who screened studies).                                                                                                                                                                                                                                                   | p. 9                  |
| 8  | Study characteristics      | Present the characteristics of the included studies (e.g. year of publication, country, population, number of participants, data collection, methodology, analysis, research questions).                                                                                                                                                                                                                 | p. 12                 |
| 9  | Study selection results    | Identify the number of studies screened and provide reasons for study exclusion (e.g. for comprehensive searching, provide numbers of studies screened and reasons for exclusion indicated in a figure/flowchart; for iterative searching describe reasons for study exclusion and inclusion based on modifications to the research question and/or contribution to theory development).                 | pp. 12-13 and Table 1 |
| 10 | Rationale for appraisal    | Describe the rationale and approach used to appraise the included studies or selected findings (e.g. assessment of conduct (validity and robustness), assessment of reporting (transparency), assessment of content and utility of the findings).                                                                                                                                                        | pp. 9-10              |
| 11 | Appraisal items            | State the tools, frameworks and criteria used to appraise the studies or selected findings (e.g. Existing tools: CASP, QARI, COREQ, Mays and Pope [25]; reviewer developed tools; describe the domains assessed: research team, study design, data analysis and interpretations, reporting).                                                                                                             | pp. 9-10              |
| 12 | Appraisal process          | Indicate whether the appraisal was conducted independently by more than one reviewer and if consensus was required.                                                                                                                                                                                                                                                                                      | p. 30                 |
| 13 | Appraisal results          | Present results of the quality assessment and indicate which articles, if any, were weighted/excluded based on the assessment and give the rationale.                                                                                                                                                                                                                                                    | Appendix C            |
| 14 | Data extraction            | Indicate which sections of the primary studies were analysed and how were the data extracted from the primary studies? (e.g. all text under the headings "results /conclusions" were extracted electronically and entered into a computer software).                                                                                                                                                     | pp. 10-12             |
| 15 | Software                   | State the computer software used, if any.                                                                                                                                                                                                                                                                                                                                                                | pp. 9-10              |
| 16 | Number of reviewers        | Identify who was involved in coding and analysis.                                                                                                                                                                                                                                                                                                                                                        | p. 11                 |
| 17 | Coding                     | Describe the process for coding of data (e.g. line by line coding to search for concepts).                                                                                                                                                                                                                                                                                                               | p. 10                 |
| 18 | Study comparison           | Describe how were comparisons made within and across studies (e.g. subsequent studies were coded into pre-existing concepts, and new concepts were created when deemed necessary).                                                                                                                                                                                                                       | p. 11                 |
| 19 | Derivation of themes       | Explain whether the process of deriving the themes or constructs was inductive or deductive.                                                                                                                                                                                                                                                                                                             | p. 11                 |
| 20 | Quotations                 | Provide quotations from the primary studies to illustrate themes/constructs, and identify whether the quotations were participant quotations of the author's interpretation.                                                                                                                                                                                                                             | pp. 17-27             |
| 21 | Synthesis output           | Present rich, compelling and useful results that go beyond a summary of the primary studies (e.g. new interpretation, models of evidence, conceptual models, analytical framework, development of a new theory or construct).                                                                                                                                                                            | pp. 17-33             |
