# Supplementary material for: Integrating patient values and preferences in healthcare: a systematic review of qualitative evidence
Source: PubMed Central journal article supplement — BMJ Open. 2022 Nov 17;12(11):e067268. doi: 10.1136/bmjopen-2022-067268 (PMC9677014; doi:10.1136/bmjopen-2022-067268), 2022-11-17
Supplement: bmjopen-2022-067268supp001.pdf [file bmjopen-2022-067268supp001.pdf]

## SUPPLEMENTAL MATERIALS

### Appendix A – Protocol Registration, 11 May 2020

No. [CRD42020166002](https://www.crd.york.ac.uk/prospero/display_record.php?RecordID=166002) – [https://www.crd.york.ac.uk/prospero/display\\_record.php?RecordID=166002](https://www.crd.york.ac.uk/prospero/display_record.php?RecordID=166002)

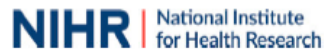

**PROSPERO**  
International prospective register of systematic reviews

To enable PROSPERO to focus on COVID-19 submissions, this registration record has undergone basic automated checks for eligibility and is published exactly as submitted. PROSPERO has never provided peer review, and usual checking by the PROSPERO team does not endorse content. Therefore, automatically published records should be treated as any other PROSPERO registration. Further detail is provided [here](#).

#### Citation

Michael Tringale, Genia Stephen, Carl Heneghan, Anne-Marie Boylan. Incorporating patient values and preferences in health care for adults with noncommunicable diseases: A systematic review of qualitative evidence. PROSPERO 2020 CRD42020166002 Available from: [https://www.crd.york.ac.uk/prospero/display\\_record.php?ID=CRD42020166002](https://www.crd.york.ac.uk/prospero/display_record.php?ID=CRD42020166002)

#### Review question

What are the approaches, barriers, and facilitators that practicing health care professionals (HCPs) experience regarding the integration of patient values and preferences in primary and secondary care for adults with noncommunicable diseases (NCDs)?

#### Searches

This review is concerned with identifying studies regarding HCPs and their experiences incorporating patient values and preferences into their evidence based care (Sackett 1996). Reviewers will use the Joanna Briggs Institute (JBI) search method (Aromataris and Munn 2017) with terms adapted from an initial scoping of electronic databases MEDLINE and CINAHL with an analysis of text from titles, abstracts, and index terms used to describe references. Then, full systematic literature searches will be tailored and conducted for 12 databases including ASSIA, CINAHL, DARE, EMBASE, ERIC, Google Scholar, GreyLit, GreyNet, MEDLINE (via Ovid and PubMed), PsycINFO, Scopus and Web of Science.

#### Types of study to be included

This review will consider studies and other evidence with full text available in English that focus on qualitative data including, but not limited to, designs such as phenomenology, grounded theory, ethnography, action research, other interpretive studies, and methods such as interviews, focus groups, and surveys. Also considered will be mixed-methods studies reporting relevant qualitative data or analysis regarding the topic and population of interest. This review is concerned with current relevant practice so only studies from the year 2000 or later will be included.

#### Condition or domain being studied

This review will consider studies involving care for adults in the four major NCD groups: cancers, cardiovascular diseases, diabetes, and chronic respiratory diseases (WHO 2020).

#### Participants/population

The population of interest is practicing HCPs in primary and secondary care. To the extent that some studies of patient populations may also include relevant HCP data, these studies may be included but only the HCP perspectives will be extracted.

#### Intervention(s), exposure(s)

The population of interest is practicing HCPs in primary and secondary care. To the extent that some studies of patient populations may also include relevant HCP data, these studies may be included but only the HCP perspectives will be extracted.

#### Comparator(s)/control

None

#### Context

This review will consider evidence from non-emergency and non-inpatient settings where clinicians provide primary or secondary care for adults with NCDs.

### Main outcome(s)

- Approaches to integrating patient values and preferences into clinical care.
- Barriers to integrating patient values and preferences into clinical care.
- Facilitators to integrating patient values and preferences into clinical care.
- Thematic analysis, interpretation, and insights.

### Measures of effect

Main outcomes will be presented as qualitative data such as verbatims from, and interpretations of, included studies, as well as an author synthesis and interpretation of the qualitative evidence reviewed.

### Additional outcome(s)

- Practice recommendations for integration of patient values and preferences into evidence based care.
- Further research recommendations.

### Measures of effect

Additional outcomes will be presented as recommendations by the author.

### Data extraction (selection and coding)

Prospective studies will be saved in RefWorks for cataloging and reference management, imported to EPPI Reviewer for screening, and uploaded to NVivo for data extraction and coding. The primary author will screen titles and abstracts for inclusion, with double-screening of a random sample by a secondary reviewer (Taylor-Phillips et al, 2017), with disagreement resolved by discussion or with a third reviewer/advisor. A full text screening will be performed to identify references for final inclusion.

Qualitative data will be extracted from included references using a modified version of the JBI Data Extraction Tool (Aromataris and Munn 2017) to include specific details about the population, context, study methods, the phenomena of interest relevant to the review question. Data will be synthesized using a meta-aggregation approach and a narrative synthesis. Where textual pooling is not possible, findings will be presented in narrative form.

### Risk of bias (quality) assessment

In addition to double-screening references, quality appraisal will be performed by the primary author using the JBI Critical Appraisal Checklist for Qualitative Research (Aromataris and Munn 2017) with a random sample assessed by the second reviewer with disagreement resolved by discussion or with a third reviewer/advisor. The CONQual approach (Munn et al, 2014) will also be used wherein an overall ranking will be assigned to rate the confidence of any synthesized qualitative findings which will be presented in a summary of findings table describing the dependability and credibility of each finding.

### Strategy for data synthesis

The data will be analyzed using meta-aggregation and thematic synthesis. Qualitative research findings will be pooled using the coding and synthesis strategies and tools enabled by NVivo including further collection and synthesis of findings to generate a set of statements that represent the aggregation, organization, and categorization of the findings based on similarity in meaning. These categories will then be subjected to further synthesis to produce a single comprehensive set of findings that can be used as the basis for analysis, interpretation, reporting, and recommendations.

### Analysis of subgroups or subsets

Data related to different contexts such as disease severities, prognoses, multimorbidities, and/or HCP types, to the extent that such data will be available in the included studies, may be analyzed as subgroups.

### Contact details for further information

Michael Tringale  
MikeTringale@gmail.com

Tringale, Michael et al, bmjopen-2022-067268

**NIHR** | National Institute  
for Health Research**PROSPERO**  
International prospective register of systematic reviews**Organisational affiliation of the review**University of Oxford  
[www.ox.ac.uk](http://www.ox.ac.uk)**Review team members and their organisational affiliations**Michael Tringale. University of Oxford  
Genia Stephen. University of Oxford  
Dr Carl Heneghan. University of Oxford  
Dr Anne-Marie Boylan. University of Oxford**Type and method of review**

Narrative synthesis, Synthesis of qualitative studies, Systematic review, Other

**Anticipated or actual start date**

01 February 2020

**Anticipated completion date**

01 December 2020

**Funding sources/sponsors**

Self-funded with a Research Support Grant from Kellogg College, University of Oxford

**Conflicts of interest****Language**

English

**Country**

United States of America

**Stage of review [1 change]**

Review Completed published

**Details of final report/publication(s) or preprints if available [1 change]**

Pre-reviewed, pre-graded, pre-published summary of results and conclusions includes:

Results: From 3331 potential records, 35 met inclusion criteria. Findings comprised: 146 approaches to incorporating patient values and preferences grouped into 18 main themes with 12 subthemes; 92 barriers grouped into 4 main themes with 13 subthemes; 46 facilitators grouped into 5 main themes with 8 subthemes; and, 52 epistemologies related to incorporating patient values and preferences. Four primary concepts summarize all of these findings: Concern, Competence, Communication, and Congruence.

Conclusions: HCPs incorporate patient values and preferences into health care through actions of Concern, Competence, Communication, and Congruence, and there are numerous philosophies that influence how HCPs regard and approach patient values and preferences. HCPs face a number of barriers to incorporating patient values and preferences but they are also facilitated by several factors.

**Subject index terms status**

Subject indexing assigned by CRD

**Subject index terms**

MeSH headings have not been applied to this record

**Date of registration in PROSPERO**

05 July 2020

**Date of first submission**

Tringale, Michael et al, bmjopen-2022-067268

11 May 2020

Stage of review at time of this submission [2 changes]

| Stage                                                           | Started | Completed |
|-----------------------------------------------------------------|---------|-----------|
| Preliminary searches                                            | Yes     | No        |
| Piloting of the study selection process                         | Yes     | No        |
| Formal screening of search results against eligibility criteria | No      | No        |
| Data extraction                                                 | No      | No        |
| Risk of bias (quality) assessment                               | No      | No        |
| Data analysis                                                   | No      | No        |

*The record owner confirms that the information they have supplied for this submission is accurate and complete and they understand that deliberate provision of inaccurate information or omission of data may be construed as scientific misconduct.*

*The record owner confirms that they will update the status of the review when it is completed and will add publication details in due course.*

**Versions**

05 July 2020

18 November 2020

29 November 2020

## Appendix B – Search Strategy Details

NOTE: Unless otherwise stated, all searches were limited to publication dates 2000 to 2020, English language only. Standard “MeSH” terms ([Medial Subject Headings](#)) established by the National Library of Medicine for use with Medline and other databases were of some use for this review’s search. Main MeSH headings of interest included:

- Communication
- Communication Barrier/s
- Communication Method/s
- Consumer Preference/s
- Decision-Making, Shared
- Evidence-Based Medicine
- Evidence-Based Nursing
- Evidence-Based Practice
- Health Communication
- Implementation Science
- Patient Advocacy
- Patient-Centered Care
- Patient Preference/s
- Patient Participation
- Physician-Patient Relation/s (Relationship/s)
- Professional-Patient Relations

---

### EMBASE – Excerpta Medica DataBASE

<https://www.elsevier.com/solutions/embase-biomedical-research>

(January 2000 to May 2020) 1031 studies identified

*Primary keywords and search string in “advanced search” tool; preselect English only, titles, abstracts and indexed terms:*

1. ((physician\* OR "health professional\*" OR "healthcare professional\*" OR "health care professional\*" OR practitioner\* OR specialist\* OR doctor\* OR nurse\* OR provider\* OR "clinician\*" OR "clinic\* staff") ADJ10 (perspective\* OR attitude\* OR opinion\* OR behavior\* OR behaviour\* OR practices))
2. (integrat\* OR implement\* OR incorporat\* OR consider\* OR promote\* OR use\* OR using OR approach\* OR barrier\* OR facilitate\* OR regard\*) AND ((patient\* OR client\* OR individual\* OR consumer\*) ADJ5 (values OR preferences))
3. (qualitative OR review OR synthesis OR analysis OR narrative OR interview\* OR observation\* OR survey\* OR "focus group\*")
4. (patient NOT (palliative OR "end of life" "end-of-life" OR "advanced directive\*" OR child OR surge\* OR emergenc\* OR resuscitat\* OR terminal\*))
5. 1 and 2 and 3 and 4

### PubMed-Medline

<http://www.pubmed.com/>

(January 2000 to May 2020) 661 studies identified

*Primary keywords and search string in “advanced” search tool; preselect English only, titles, abstracts and indexed terms:*

Tringale, Michael et al, bmjopen-2022-067268

(((((("physician"[Title] OR "health professional"[Title] OR "healthcare professional"[Title] OR "health care professional"[Title] OR "practitioner"[Title] OR "specialist"[Title] OR "doctor"[Title] OR "nurse"[Title] OR "provider"[Title] OR "clinician"[Title] OR ("clinic"[All Fields] AND ("staff"[All Fields] OR "staff s"[All Fields] OR "staffs"[All Fields]))) AND (((("perspective"[Title] OR "attitude"[Title] OR "opinion"[Title] OR "behavior"[Title] OR "behaviour"[Title] OR (((((((("practicability"[All Fields] OR "practicable"[All Fields] OR "practical"[All Fields] OR "practicalities"[All Fields] OR "practicality"[All Fields] OR "practically"[All Fields] OR "practicals"[All Fields] OR "practice"[All Fields] OR "practice s"[All Fields] OR "practiced"[All Fields] OR "practices"[All Fields] OR "practicing"[All Fields]))) AND (((((((("qualitative"[Title] OR "review"[Title] OR "synthesis"[Title] OR "analysis"[Title] OR "narrative"[Title] OR "interview"[Title] OR "observation"[Title] OR "survey"[Title] OR "focus group"[All Fields])) AND (((("patient"[Title] OR "client"[Title] OR "individual"[Title] OR "consumer"[All Fields]) AND ("values"[Title] OR (((((((("prefer"[All Fields] OR "preferable"[All Fields] OR "preferably"[All Fields] OR "preferred"[All Fields] OR "preference"[All Fields] OR "preferences"[All Fields] OR "preferred"[All Fields] OR "preferring"[All Fields] OR "prefers"[All Fields]))))

### Scopus

<https://www.elsevier.com/solutions/scopus>

(January 2000 to July 2020) 627 studies identified

*Primary keywords and search string: (NOTE: 147,000 results originally from this string; Scopus provides pre-set search inclusion/exclusion options to choose. To narrow this search I selected publication year range 2000-2020; included only Med, Nursing, Health Professions; only USA, UK, CAN, and the 4 primary NCDs of interested to this study, Oncology, CV, Respiratory, Diabetes.)*

("primary care" OR "specialist care" OR "secondary care") AND (diabetes OR asthma OR cardiovascular OR cancer OR COPD) AND (((((physician\* OR "health professional\*" OR "healthcare professional\*" OR "health care professional\*" OR practitioner\* OR specialist\* OR doctor\* OR nurse\* OR provider\* OR "clinician\*" OR "clinic\* staff") W/10 (perspective\* OR attitude\* OR opinion\* OR behavior\* OR behaviour\* OR practices)) AND ((integrat\* OR implement\* OR incorporat\* OR consider\* OR promote\* OR use\* OR using OR approach\* OR barrier\* OR facilitate\* OR regard\*) AND ((patient\* OR client\* OR individual\* OR consumer\*) W/5 (values OR preferences)))) AND (qualitative OR review OR synthesis OR analysis OR narrative OR interview\* OR observation\* OR survey\* OR "focus group\*")) AND NOT ("patient-reported" OR "advance planning" OR palliative OR "end of life" "end-of-life" OR "advanced directive\*" OR child OR children OR pediatric OR teen\* OR adolescent\* OR surge\* OR emergenc\* OR resuscitat\* OR terminal\*) AND NOT (patient W/3 (perspective\* OR attitude\* OR opinion\* OR behavior\* OR behavior\* OR understanding OR awareness OR education OR satisfaction))

### OVID-Medline

<https://www.ovid.com/product-details.901.html>

(January 2000 to May 2020) 583 studies identified

*Primary keywords and search string in "advanced search" tool; preselect English only, titles, abstracts and indexed terms:*

1. ((physician\* OR "health professional\*" OR "healthcare professional\*" OR "health care professional\*" OR practitioner\* OR specialist\* OR doctor\* OR nurse\* OR provider\* OR "clinician\*" OR "clinic\* staff") ADJ10 (perspective\* OR attitude\* OR opinion\* OR behavior\* OR behavior\* OR practices))

Tringale, Michael et al, *bmjopen-2022-067268*

2. (integrat\* OR implement\* OR incorporat\* OR consider\* OR promote\* OR use\* OR using OR approach\* OR barrier\* OR facilitate\* OR regard\*) AND ((patient\* OR client\* OR individual\* OR consumer\*) ADJ5 (values OR preferences))
3. (qualitative OR review OR synthesis OR analysis OR narrative OR interview\* OR observation\* OR survey\* OR "focus group\*")
4. (patient NOT (palliative OR "end of life" "end-of-life" OR "advanced directive\*" OR child OR surge\* OR emergenc\* OR resuscitat\* OR terminal\*))
5. 1 and 2 and 3 and 4

### **CINAHL – Cumulative Index to Nursing and Allied Health Literature**

<https://www.ebscohost.com/nursing/products/cinahl-databases/the-cinahl-database>

(January 2000 to July 2020) 464 studies identified after duplicates removed)

*Primary keywords and search string; titles and abstracts:*

((qualitative OR review OR synthesis OR analysis OR narrative OR interview\* OR observation\* OR survey\* OR "focus group\*") AND (physician\* OR "health professional\*" OR "healthcare professional\*" OR "health care professional\*" OR practitioner\* OR specialist\* OR doctor\* OR nurse\* OR provider\* OR "clinician\*" OR "clinic\* staff") AND (perspective\* OR attitude\* OR opinion\* OR behavior\* OR behavior\* OR practices\*) AND (integrat\* OR implement\* OR incorporat\* OR consider\* OR promote\* OR use\* OR using OR approach\* OR barrier\* OR facilitate\* OR regard\*) AND ("patient\* values" OR "patient\* preferences" OR "client\* values" OR "client\* preferences" OR "individual\* values" OR "individual\* preferences" OR "consumer\* values" OR "consumer\* preferences")) NOT (palliative OR "end of life" OR "end-of-life" OR "advanced directive\*" OR child OR surge\* OR emergenc\* OR resuscitat\* OR terminal\*)

### **ASSIA – Applied Social Science Index and Abstracts**

<https://search.proquest.com/assia? ga=2.36367776.1827441237.1546299943-1531284045.1543164998>

(January 2000 to July 2020) 407 studies identified

*Primary keywords and search string:*

(ab(((patient NEAR/2 (values OR preferences))) AND ((physician OR doctor OR provider) NEAR/5 (practices OR perspectives OR attitudes OR opinions))) AND qualitative) OR ti((patient AND (values OR preferences)) AND (physician OR doctor OR provider)) OR ti(patient values) OR ((((((physician OR "health professional" OR "healthcare professional" OR "health care professional" OR practitioner OR specialist OR doctor OR nurse OR provider OR "clinician" OR staff) NEAR/10 (perspectives OR attitudes OR opinions OR behavior OR behaviour OR practices)) AND ((integrate OR implement OR incorporate OR consider OR promote OR approaches OR barriers OR facilitate OR facilitators) NEAR/5 ((patient OR client OR individual OR consumer) NEAR/3 (values OR preferences)))))) AND (qualitative OR review OR synthesis OR analysis OR narrative OR interviews OR observations OR survey OR "focus groups")) NOT (palliative OR "end of life" "end-of-life" OR "advanced directives" OR child OR surgery OR emergency OR resuscitation OR terminal)) AND pd(20000101-20200630))

### **PsychINFO**

<https://www.apa.org/pubs/databases/psycinfo/index.aspx>

(January 2000 to July 2020) 255 studies identified

*Primary keywords and search string using "advanced search" tool; limited to abstracts:*

1. ((physician\* OR "health professional\*" OR "healthcare professional\*" OR "health care professional\*" OR practitioner\* OR specialist\* OR doctor\* OR nurse\* OR provider\* OR "clinician\*" OR "clinic\* staff") ADJ10 (perspective\* OR attitude\* OR opinion\* OR behavior\* OR behaviour\* OR practices))
2. (integrat\* OR implement\* OR incorporat\* OR consider\* OR promote\* OR use\* OR using OR approach\* OR barrier\* OR facilitate\* OR regard\*) AND ((patient\* OR client\* OR individual\* OR consumer\*) ADJ5 (values OR preferences))
3. (qualitative OR review OR synthesis OR analysis OR narrative OR interview\* OR observation\* OR survey\* OR "focus group\*")
4. (patient\* NOT (palliative OR "end of life" "end-of-life" OR "advanced directive\*" OR child OR surge\* OR emergenc\* OR resuscitat\* OR terminal\*))
5. 1 and 2 and 3 and 4

### Web of Science

<http://apps.webofknowledge.com/>

(January 2000 to July 2020) 231 studies identified

#### Primary keywords and search string:

((physician\* OR "health professional\*" OR "healthcare professional\*" OR "health care professional\*" OR practitioner\* OR specialist\* OR doctor\* OR nurse\* OR provider\* OR "clinician\*" OR "clinic\* staff") NEAR/10 (perspective\* OR attitude\* OR opinion\* OR behavior\* OR behavior\* OR practices)) AND ((integrat\* OR implement\* OR incorporat\* OR consider\* OR promote\* OR use\* OR using OR approach\* OR barrier\* OR facilitate\* OR regard\*) NEAR/5 ((patient\* OR client\* OR individual\* OR consumer\*) NEAR/3 (values OR preferences))) AND (qualitative OR review OR synthesis OR analysis OR narrative OR interview\* OR observation\* OR survey\* OR "focus group\*") NOT (palliative OR "end of life" "end-of-life" OR "advanced directive\*" OR child OR surge\* OR emergenc\* OR resuscitat\* OR terminal\*)

### Google Scholar

<https://scholar.google.com/>

(January 2000 to April 2020) 95 studies identified

#### Primary keywords and search strategy:

- Screened for "qualitative" and/or "review"
- Exact phrases "patient values" and/or "patient preferences"
- Must include "physician" "health professional" "doctor" "nurse" or variants
- Also included anything re. various types of cancers or "patient/physician communication & relationship" or "joint/shared decision-making" etc.
- Excluded "end of life" "terminal" "end stage" "directives" "advanced care planning" arthritis, fibromyalgia (non-top NCDs) or resuscitation

### DARE – Database of Abstracts of Reviews for Effectiveness

<https://www.crd.york.ac.uk/CRDWeb/>

(January 2000 to July 2020) 19 studies identified

#### Primary keywords and search string; select DARE database only; publication year 2000 to 2020; search titles only:

((qualitative OR review OR synthesis OR analysis OR narrative OR interview\* OR observation\* OR survey\* OR "focus group\*") AND (physician\* OR "health professional\*" OR "healthcare



Tringale, Michael et al, bmjopen-2022-067268

professional\*" OR "health care professional\*" OR practitioner\* OR specialist\* OR doctor\* OR nurse\* OR provider\* OR "clinician\*" OR "clinic\* staff") AND (perspective\* OR attitude\* OR opinion\* OR behavior\* OR behavior\*)

#### **ERIC – Education Resources Information Center**

<https://eric.ed.gov/>

(January 2000 to July 2020) 7 studies identified

*Primary keywords and search string; full text available only:*

("patients values" OR "patients preferences")

#### **GreyLit**

<http://greylit.org/>

(2000 to 2020) 1 study identified

*Primary keywords and search string (note this database was discontinued in 2017, but remains searchable up to that date):*

"patients preferences" (6 results) narrowed with additional keyword "values"

#### **Forward-Backward Searches**

(January 2000 to August 2020) 86 studies identified

## Appendix C – Appraisal Checklist & Quality Assessment of Included Records

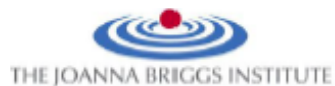

### JBI Critical Appraisal Checklist for Qualitative Research

Reviewer \_\_\_\_\_ Date \_\_\_\_\_

Author \_\_\_\_\_ Year \_\_\_\_\_ Record Number \_\_\_\_\_

|                                                                                                                                                    | Yes                      | No                       | Unclear                  | Not applicable           |
|----------------------------------------------------------------------------------------------------------------------------------------------------|--------------------------|--------------------------|--------------------------|--------------------------|
| 1. Is there congruity between the stated philosophical perspective and the research methodology?                                                   | <input type="checkbox"/> | <input type="checkbox"/> | <input type="checkbox"/> | <input type="checkbox"/> |
| 2. Is there congruity between the research methodology and the research question or objectives?                                                    | <input type="checkbox"/> | <input type="checkbox"/> | <input type="checkbox"/> | <input type="checkbox"/> |
| 3. Is there congruity between the research methodology and the methods used to collect data?                                                       | <input type="checkbox"/> | <input type="checkbox"/> | <input type="checkbox"/> | <input type="checkbox"/> |
| 4. Is there congruity between the research methodology and the representation and analysis of data?                                                | <input type="checkbox"/> | <input type="checkbox"/> | <input type="checkbox"/> | <input type="checkbox"/> |
| 5. Is there congruity between the research methodology and the interpretation of results?                                                          | <input type="checkbox"/> | <input type="checkbox"/> | <input type="checkbox"/> | <input type="checkbox"/> |
| 6. Is there a statement locating the researcher culturally or theoretically?                                                                       | <input type="checkbox"/> | <input type="checkbox"/> | <input type="checkbox"/> | <input type="checkbox"/> |
| 7. Is the influence of the researcher on the research, and vice-versa, addressed?                                                                  | <input type="checkbox"/> | <input type="checkbox"/> | <input type="checkbox"/> | <input type="checkbox"/> |
| 8. Are participants, and their voices, adequately represented?                                                                                     | <input type="checkbox"/> | <input type="checkbox"/> | <input type="checkbox"/> | <input type="checkbox"/> |
| 9. Is the research ethical according to current criteria or, for recent studies, and is there evidence of ethical approval by an appropriate body? | <input type="checkbox"/> | <input type="checkbox"/> | <input type="checkbox"/> | <input type="checkbox"/> |
| 10. Do the conclusions drawn in the research report flow from the analysis, or interpretation, of the data?                                        | <input type="checkbox"/> | <input type="checkbox"/> | <input type="checkbox"/> | <input type="checkbox"/> |

Tringale, Michael et al, *bmjopen-2022-067268*

## Quality Assessment of Included Records

| <b>Key to JBI Critical Appraisal Checklist for Qualitative Research</b> |                                                                                                                |
|-------------------------------------------------------------------------|----------------------------------------------------------------------------------------------------------------|
| JBI-Q1                                                                  | Is there congruity between stated philosophical perspective and research methodology?                          |
| JBI-Q2                                                                  | Is there congruity between research methodology and research question or objective?                            |
| JBI-Q3                                                                  | Is there congruity between the research methodology and the data collection methods?                           |
| JBI-Q4                                                                  | Is there congruity between the research methodology and the representation and analysis of data?               |
| JBI-Q5                                                                  | Congruity between the research methodology and the interpretation of results.                                  |
| JBI-Q6                                                                  | Is there a statement locating the researcher culturally or theoretically?                                      |
| JBI-Q7                                                                  | Is the influence of the researcher on the research, and vice-versa, addressed?                                 |
| JBI-Q8                                                                  | Are participants voices adequately represented?                                                                |
| JBI-Q9                                                                  | Is the research ethical according to current criteria, or evidence of ethical approval by an appropriate body? |
| JBI-Q10                                                                 | Do the conclusions flow from the analysis, or interpretation, of the data?                                     |

| Author (Year)              | Ref. | JBI-Q1 | JBI-Q2 | JBI-Q3 | JBI-Q4 | JBI-Q5 | JBI-Q6 | JBI-Q7 | JBI-Q8 | JBI-Q9 | JBI-Q10 |
|----------------------------|------|--------|--------|--------|--------|--------|--------|--------|--------|--------|---------|
| Aita V et al. (2005)       | 36   | Yes    | Yes    | Yes    | Yes    | Yes    | Yes    | No     | Yes    | Yes    | Yes     |
| Chhabra KR et al. (2013)   | 37   | Yes    | Yes    | Yes    | Yes    | Yes    | No     | No     | Yes    | Yes    | Yes     |
| Davis K et al. (2017)      | 38   | Yes    | Yes    | Yes    | Yes    | Yes    | No     | No     | Yes    | Yes    | Yes     |
| Elwyn G et al. (2000)      | 39   | Yes    | Yes    | Yes    | Yes    | Yes    | No     | No     | Yes    | Yes    | Yes     |
| Feiring E et al. (2020)    | 40   | Yes    | Yes    | Yes    | Yes    | Yes    | No     | No     | Yes    | Yes    | Yes     |
| Ford S et al. (2002)       | 32   | Yes    | Yes    | Yes    | Yes    | Yes    | No     | No     | Yes    | Yes    | Yes     |
| Ford S et al. (2003)       | 31   | Yes    | Yes    | Yes    | Yes    | Yes    | No     | No     | Yes    | yes    | Yes     |
| Ford S et al. (2006)       | 41   | Yes    | Yes    | Yes    | Yes    | Yes    | No     | No     | No     | Yes    | Yes     |
| Friedberg MW et al. (2013) | 42   | Yes    | Yes    | Yes    | Yes    | Yes    | Yes    | No     | Yes    | Yes    | Yes     |
| Golden SE et al. (2017)    | 43   | Yes     |
| Gruß I et al. (2019)       | 44   | Yes    | Yes    | Yes    | Yes    | Yes    | Yes    | No     | Yes    | Yes    | Yes     |
| Hall J et al. (2011)       | 45   | Yes    | Yes    | Yes    | Yes    | Yes    | No     | No     | No     | N/A    | Yes     |
| Hart PL et al. (2014)      | 46   | Yes     |
| Hisham R et al. (2016)     | 47   | Yes     |
| Jefford M et al. (2002)    | 48   | Yes    | Yes    | Yes    | Yes    | Yes    | No     | No     | No     | N/A    | Yes     |
| Kennedy BM et al. (2017)   | 49   | Yes     |
| Landmark AM et al. (2016)  | 50   | Yes    | Yes    | Yes    | Yes    | Yes    | No     | No     | Yes    | Yes    | Yes     |
| Lown B et al. (2009)       | 51   | Yes    | Yes    | Yes    | Yes    | Yes    | No     | No     | Yes    | Yes    | Yes     |
| McLeod H et al. (2017)     | 33   | Yes     |
| Murdoch J et al. (2020)    | 52   | Yes    | Yes    | Yes    | Yes    | Yes    | No     | No     | Yes    | Yes    | Yes     |
| Paiva D et al. (2019)      | 53   | Yes    | Yes    | Yes    | Yes    | Yes    | No     | No     | Yes    | Yes    | Yes     |
| Pieterse AH et al. (2011)  | 54   | Yes    | Yes    | Yes    | Yes    | Yes    | No     | No     | Yes    | Yes    | Yes     |

Tringale, Michael et al, *bmjopen-2022-067268*

| Author (Year)                   | Ref. | JB1-Q1 | JB1-Q2 | JB1-Q3 | JB1-Q4 | JB1-Q5 | JB1-Q6 | JB1-Q7 | JB1-Q8 | JB1-Q9 | JB1-Q10 |
|---------------------------------|------|--------|--------|--------|--------|--------|--------|--------|--------|--------|---------|
| Salter C et al. (2019)          | 55   | Yes    | Yes    | Yes    | Yes    | Yes    | No     | No     | Yes    | Yes    | Yes     |
| Schulman-Green DJ et al. (2006) | 56   | Yes    | Yes    | Yes    | Yes    | Yes    | No     | No     | Yes    | Yes    | Yes     |
| Shepherd HL et al. (2011)       | 57   | Yes    | Yes    | Yes    | Yes    | Yes    | Yes    | No     | Yes    | Yes    | Yes     |
| Shortus T et al. (2011)         | 58   | Yes     |
| Tracy CS et al. (2003)          | 59   | Yes    | Yes    | Yes    | Yes    | Yes    | No     | Yes    | Yes    | Yes    | Yes     |
| Van Humbeeck et al. (2020)      | 60   | Yes    | Yes    | Yes    | Yes    | Yes    | No     | No     | Yes    | Yes    | Yes     |
| Vermunt N et al. (2019)         | 61   | Yes     |
| Visser LNC et al. (2018)        | 62   | Yes    | Yes    | Yes    | Yes    | Yes    | No     | No     | Yes    | Yes    | Yes     |
| Zulman DM et al. (2020)         | 63   | Yes     |

Tringale, Michael et al, bmjopen-2022-067268

## Appendix D – Data Extraction Tool

Modified version of the JBI Data Extraction Tool

| Item to be Extracted                                 | Data |
|------------------------------------------------------|------|
| Study ID                                             |      |
| Publication Year                                     |      |
| Title                                                |      |
| Publication                                          |      |
| Study Reference in Full                              |      |
| Study Aim/Objective/Phenomena of Interest            |      |
| Qual Methodology                                     |      |
| Qual Method(s)                                       |      |
| Analytical Approach                                  |      |
| HCP Participant Type                                 |      |
| No. HCP Participants                                 |      |
| Level of HCP Experience                              |      |
| Setting (Clinical Context)                           |      |
| Location (Geography)                                 |      |
| No. Practices/Sites/Clinics                          |      |
| No. Clinical Consultations, Encounters, Interactions |      |
| NCD Category                                         |      |
| Qual Findings                                        |      |
| Author Conclusions                                   |      |
| Reviewer Comments                                    |      |
| Extraction Completed Date                            |      |

## Appendix E – Findings & Citations: Table of Approaches to Values Integration

| Primary Themes               | Subthemes                                              | Healthcare Professional Approaches/Behaviors                                    | Citation(s)                                                                                                                                                                                       |
|------------------------------|--------------------------------------------------------|---------------------------------------------------------------------------------|---------------------------------------------------------------------------------------------------------------------------------------------------------------------------------------------------|
| <b>Approaches of CONCERN</b> | Advocating                                             | Advocating for the Patient                                                      | Aita, Davis, Elwyn, Ford'02, Ford'03, Lown, Paiva, Tracy                                                                                                                                          |
|                              |                                                        | Making Referrals, Seeking Second Opinions                                       | Aita, Chhabra, Ford'06, Friedberg, McLeod, Murdoch, Tracy, Visser                                                                                                                                 |
|                              | Caring & Connecting                                    | Acting in a Relational Way                                                      | Aita, Lown, Paiva, Zulman                                                                                                                                                                         |
|                              |                                                        | Being Genuine/Sincere                                                           | Aita, McLeod, Salter, Shortus, Van Humbeeck, Zulman                                                                                                                                               |
|                              |                                                        | Comforting/Reassuring/Supporting the Patient                                    | Aita, Feiring, Ford'02, Ford'03, Friedberg, Grub, Hart, Jefford, Kennedy, Landmark, Lown, McLeod, Murdoch, Paiva, Pieterse, Salter, Schulman-Green, Shepherd, Tracy, Van Humbeeck, Visser, Zulman |
|                              |                                                        | Creating a Safe Space to Talk/Question/Disagree                                 | Chhabra, Elwyn, Feiring, Ford'02, Ford'03, Golden, Grub, Hisham, Jefford, Landmark, Lown, McLeod, Paiva, Pieterse, Salter, Shepherd, Tracy, Van Humbeeck                                          |
|                              |                                                        | Expressive Touch                                                                | Hall, McLeod, Zulman                                                                                                                                                                              |
|                              |                                                        | Focus on Prevention                                                             | Aita, Murdoch                                                                                                                                                                                     |
|                              |                                                        | Making the Patient Feel Comfortable                                             | Ford'02, Lown, McLeod, Visser                                                                                                                                                                     |
|                              |                                                        | Mindfulness                                                                     | Grub, Lown, McLeod, Zulman                                                                                                                                                                        |
|                              |                                                        | Seeing Patient Perspective/Having (vs. "showing/exhibiting/displaying") Empathy | Aita, Davis, Elwyn, Ford'03, Friedberg, Golden, Grub, Hall, Kennedy, Landmark, Lown, McLeod, Murdoch, Paiva, Pieterse, Schulman-Green, Van Humbeeck, Vermont, Visser, Zulman                      |
|                              |                                                        | Sharing Doctor's Own Personal Experiences, Making the Doctor Approachable       | Kennedy, McLeod                                                                                                                                                                                   |
|                              |                                                        | Sharing Personal Interests, Feelings, Experiences                               | Lown, McLeod                                                                                                                                                                                      |
|                              |                                                        | Showing/Exhibiting/Displaying (vs. "having") Compassion, Empathy, Caring        | Ford'03, Golden, Grub, Kennedy, Lown, McLeod, Murdoch, Paiva, Van Humbeeck, Visser, Zulman                                                                                                        |
|                              |                                                        | Showing Curiosity About the Patient/Condition                                   | Hall, Zulman                                                                                                                                                                                      |
|                              |                                                        | Treating Patient as a Unique Person/Individual                                  | McLeod, Van Humbeeck                                                                                                                                                                              |
|                              |                                                        | Valuing Feeling Comfortable                                                     | McLeod, Pieterse, Visser                                                                                                                                                                          |
|                              |                                                        | Empowering                                                                      | Enabling Patient Self-Management, Patient Agency                                                                                                                                                  |
|                              | Establishing Equality                                  |                                                                                 | Elwyn, Ford'03, Lown, McLeod, Murdoch, Van Humbeeck                                                                                                                                               |
|                              | Giving Patient Control, Final Say, Patient Empowerment |                                                                                 | Ford'02 Ford'03, Grub, Kennedy, Lown, McLeod, Murdoch, Salter, Shepherd, Van Humbeeck, Visser, Zulman                                                                                             |
|                              | Having Patience, Letting the Patient Set the Pace      |                                                                                 | Ford'03, McLeod, Visser                                                                                                                                                                           |
|                              | Invites Patient to Lead                                |                                                                                 | McLeod, Salter                                                                                                                                                                                    |
|                              | Opportunities to Reconsider                            |                                                                                 | Elwyn, Ford'03, Pieterse                                                                                                                                                                          |

Tringale, Michael et al, bmjopen-2022-067268

| Primary Themes | Subthemes                       |                   | Healthcare Professional Approaches/Behaviors         | Citation(s)                                                                                                                      |                                                                                                                                                                   |
|----------------|---------------------------------|-------------------|------------------------------------------------------|----------------------------------------------------------------------------------------------------------------------------------|-------------------------------------------------------------------------------------------------------------------------------------------------------------------|
|                |                                 |                   | Recognizing, Confirming, Validating Patient Autonomy | Chhabra, Elwyn, Ford'02, Ford'03, Ford'06, Jeffords, Lown, McLeod, Shortus, Van Humbeek                                          |                                                                                                                                                                   |
|                |                                 |                   | Respectful Environments/Clinics/Waiting Rooms        | Aita, Ford'03, McLeod                                                                                                            |                                                                                                                                                                   |
|                |                                 |                   | Respecting Privacy                                   | Ford'03, McLeod, Van Humbeek                                                                                                     |                                                                                                                                                                   |
|                |                                 |                   | Sharing Control Overall                              | Lown, McLeod                                                                                                                     |                                                                                                                                                                   |
|                |                                 |                   | Trusting/Respecting the Patient                      | Elwyn, Ford'03, Ford'06, Golden, Hart, Kennedy, Lown, McLeod, Paiva, Shortus, Vermont, Zulman                                    |                                                                                                                                                                   |
|                |                                 |                   | Valuing the Individual Patient                       | Hart, McLeod                                                                                                                     |                                                                                                                                                                   |
|                | Inviting                        |                   | Invite/Involve Carers/Caregivers                     | Ford'03, Paiva                                                                                                                   |                                                                                                                                                                   |
|                |                                 |                   | Invite/Involve Family/Loved Ones                     | Chhabra, Davis, Elwyn, Friedberg, Golden, Hart, Lown, Paiva, Salter, Van Humbeek, Visser, Zulman                                 |                                                                                                                                                                   |
|                |                                 |                   | Invite/Involve Others                                | Elwyn                                                                                                                            |                                                                                                                                                                   |
|                |                                 |                   | Seeks Input from Colleagues and Other Experts        | Elwyn, Hisham                                                                                                                    |                                                                                                                                                                   |
|                | Partnering                      |                   | Develop Partnership with the Patient                 | Aita, Elwyn, Kennedy, McLeod, Zulman                                                                                             |                                                                                                                                                                   |
|                |                                 |                   | Forms Therapeutic Alliance/Relationship with Patient | McLeod, Paiva                                                                                                                    |                                                                                                                                                                   |
|                |                                 |                   | Mutual Respect Between Patient and HCP               | Elwyn, Ford'03, McLeod, Paiva, Vermont                                                                                           |                                                                                                                                                                   |
|                |                                 |                   | Personalizing Approach/Decisions/Care                | Chhabra, Feiring, Friedberg, Jefford, McLeod, Murdoch, Paiva, Salter, Shortus, Van Humbeek, Zulman                               |                                                                                                                                                                   |
|                |                                 |                   | Takes the Long-Term View                             | Davis, Golden, Murdoch, Schulman-Green, Shortus                                                                                  |                                                                                                                                                                   |
|                |                                 |                   | Understanding the Patient                            | Davis, Elwyn, Feiring, Ford'03, Ford'06, McLeod, Friedberg, Golden, Kennedy, Landmark, Lown, Salter, Van Humbeek, Visser, Zulman |                                                                                                                                                                   |
|                | Sensing                         |                   | Cultural Sensitivity                                 | Aita, Hart, Kennedy, Lown, McLeod, Shepherd                                                                                      |                                                                                                                                                                   |
|                |                                 |                   | Interpersonal Sensitivity, Overall Concern           | Ford'03, Hall, McLeod, Paiva, Pieterse, Zulman                                                                                   |                                                                                                                                                                   |
|                |                                 |                   | Non-Judgmental                                       | Lown                                                                                                                             |                                                                                                                                                                   |
|                |                                 |                   | Respect/Include Religion                             | McLeod, Van Humbeek                                                                                                              |                                                                                                                                                                   |
|                |                                 |                   | Using Intuition                                      | Tracy                                                                                                                            |                                                                                                                                                                   |
|                | <b>Approaches of COMPETENCE</b> | Decision Making   | Decision Support                                     | Patient Decision Aids/Tools                                                                                                      | Davis, Ford'03, Friedberg, Grub, Jefford, Lown, McLeod, Shortus, Vermont                                                                                          |
|                |                                 |                   |                                                      | Stories, Vivid Descriptions                                                                                                      | Aita, Ford'03, Landmark, Lown, McLeod, Paiva                                                                                                                      |
|                |                                 | Directing         | Giving an Opinion to the Patient                     |                                                                                                                                  | Ford'03, Ford'06, Landmark, Lown, McLeod, Tracy                                                                                                                   |
|                |                                 |                   |                                                      | Listing                                                                                                                          | Elwyn, Salter                                                                                                                                                     |
|                |                                 |                   |                                                      | Making Recommendations                                                                                                           | Aita, Chhabra, Davis, Feiring, Ford'03, Friedberg, Golden, Kennedy, Landmark, McLeod, Murdoch, Paiva, Pieterse, Schulman-Green, Shepherd, Shortus, Tracy, Vermont |
|                |                                 | Sharing Decisions | Competence with Research Evidence                    |                                                                                                                                  | Elwyn, Ford'02, Ford'06, McLeod                                                                                                                                   |
|                |                                 |                   |                                                      |                                                                                                                                  |                                                                                                                                                                   |

Tringale, Michael et al, bmjopen-2022-067268

| Primary Themes | Subthemes            |                | Healthcare Professional Approaches/Behaviors        | Citation(s)                                                                                                                                                                                                                 |
|----------------|----------------------|----------------|-----------------------------------------------------|-----------------------------------------------------------------------------------------------------------------------------------------------------------------------------------------------------------------------------|
|                |                      |                | Formulating the Patient's Stance/Priorities         | Grub, Landmark, Murdoch                                                                                                                                                                                                     |
|                |                      |                | Negotiate Decisions                                 | Aita, Elwyn, Ford'03, Hall, Landmark, Lown, McLeod, Murdoch, Paiva, Salter, Shepherd, Shortus, Tracy, Vermont                                                                                                               |
|                |                      |                | Shared Decision-Making (SDM)                        | Chhabra, Davis, Elwyn, Ford'02, Ford'03, Ford'06, Friedberg, Golden, Grub, Hall, Jefford, Landmark, Lown, McLeod, Murdoch, Paiva, Pieterse, Salter, Schulman-Green, Shepherd, Shortus, Van Humbeek, Vermont, Visser, Zulman |
|                |                      |                | Understanding Diseases/Treatments                   | Ford'03, Davis, Elwyn, Feiring, Golden, Grub, Kennedy, McLeod                                                                                                                                                               |
|                | Managing             | Agenda Setting | Mutual Agenda Setting                               | Ford'06, McLeod, Murdoch, Salter, Shortus, Zulman                                                                                                                                                                           |
|                |                      |                | Mutually Set Priorities                             | Aita, Lown, McLeod, Murdoch, Salter, Shortus, Vermont, Zulman                                                                                                                                                               |
|                | Emotions             |                | Anxiety (Prevent, Recognize or Reduce)              | Chhabra, Davis, Elwyn, Feiring, Ford'03, Golden, Hall, Jefford, Landmark, Salter, Shepherd, Tracy, Visser, Zulman                                                                                                           |
|                |                      |                | Distress Management                                 | Chhabra, Golden, Hall, Jefford, Kennedy, McLeod, Paiva, Visser, Zulman                                                                                                                                                      |
|                |                      |                | Processing Emotions                                 | Hall, Landmark, Lown, McLeod, Paiva, Visser, Zulman                                                                                                                                                                         |
|                | Negotiating          |                | Assess, Evaluate Treatment Options                  | Davis, Friedberg, Golden, Grub, McLeod, Murdoch, Pieterse, Salter, Shepherd, Vermont                                                                                                                                        |
|                |                      |                | Deliberate, Weigh, Negotiate Options                | Davis, Elwyn, Ford'03, Friedberg, Golden, Grub, Landmark, McLeod, Pieterse, Shepherd                                                                                                                                        |
|                |                      |                | Contesting Patient Understanding/Responses          | Murdoch, Pieterse, Salter                                                                                                                                                                                                   |
|                |                      |                | Discuss Pros/Cons of Options                        | Chhabra, McLeod, Shepherd, Van Humbeek, Vermont                                                                                                                                                                             |
|                |                      |                | Giving, Outlining, Providing Options                | Davis, Chhabra, Elwyn, Ford'02, Ford'03, Friedberg, Golden, Grub, Jefford, McLeod, Pieterse, Shortus, Tracy, Van Humbeek                                                                                                    |
|                |                      |                | Handling Agreement & Disagreement                   | Chhabra, Landmark, Lown, McLeod, Pieterse, Schulman-Green, Shortus                                                                                                                                                          |
|                |                      |                | Mutual Agreement                                    | Pieterse                                                                                                                                                                                                                    |
|                |                      |                | Negotiate Roles/Responsibilities of Patient and HCP | Elwyn, Lown, Murdoch, Salter, Shepherd                                                                                                                                                                                      |
|                | Planning & Preparing |                | Action Plans                                        | Elwyn, Feiring, Murdoch, Salter, Vermont                                                                                                                                                                                    |
|                |                      |                | Agreeing on Priorities                              | Aita, McLeod, Ford'06, Lown, Murdoch, Salter, Shortus, Van Humbeek, Vermont, Zulman                                                                                                                                         |
|                |                      |                | Arranging Follow-Up                                 | Elwyn, Ford'03, Ford'06, Golden, Landmark, Lown, McLeod, Salter, Shepherd, Vermont                                                                                                                                          |
|                |                      |                | Mutual Planning                                     | McLeod, Paiva, Salter, Schulman-Green, Shortus                                                                                                                                                                              |
|                |                      |                | Collaborative Goal Setting                          | Murdoch, Paiva, Salter, Vermont                                                                                                                                                                                             |
|                |                      |                | Prepare for the Consultation                        | Ford'03, Salter, Shortus Zulman                                                                                                                                                                                             |
|                |                      |                | Preparing for Personalization                       | Shortus, Zulman                                                                                                                                                                                                             |
|                | Processing           |                | Actively Manage the Patient's Involvement           | Shortus                                                                                                                                                                                                                     |
|                |                      |                | Allowing/Investing Time                             | Friedberg, Lown, McLeod, Salter                                                                                                                                                                                             |
|                |                      |                | Coordination/Continuity of Care                     | Aita, Davis, Feiring, Ford'03, Friedberg, Landmark, McLeod, Salter                                                                                                                                                          |



Tringale, Michael et al, bmjopen-2022-067268

| Primary Themes                     | Subthemes       | Healthcare Professional Approaches/Behaviors                        | Citation(s)                                                                                                  |
|------------------------------------|-----------------|---------------------------------------------------------------------|--------------------------------------------------------------------------------------------------------------|
|                                    |                 | Don't Rush, Take Time                                               | Ford'03, Lown, McLeod, Schulman-Green                                                                        |
|                                    |                 | EHR, Recording, Record-Keeping Documenting                          | For'02, Friedberg, Hisham, Jefford, McLeod, Zulman                                                           |
|                                    |                 | Following-Up                                                        | Davis, Elwyn, Feiring, Ford'03, Ford'06, Golden, Landmark, McLeod, Pieterse, Vermont                         |
|                                    |                 | Keeps a Long-Term Focus                                             | David, Murdoch, Schulman-Green, Shortus                                                                      |
|                                    |                 | Leaving Time for Questions                                          | Golden                                                                                                       |
|                                    |                 | Systematic Process, Stages, Approaches to the Consultation and Care | Vermont                                                                                                      |
|                                    | Professionalism | Being Consistent with Information/Care/Decisions                    | Paiva, Vermont                                                                                               |
|                                    |                 | Honesty and Transparency                                            | Feiring, Ford'03, Golden, Jefford, Lown, McLeod, Shortus, Van Humbeeck                                       |
|                                    |                 | Responsiveness                                                      | Aita, Jefford, McLeod, Pieterse, Shepherd, Shortus, Van Humbeeck, Vermont                                    |
|                                    |                 | Realistic Approach the Patient, Care                                | Aita, Jefford, Murdoch, Pieterse, Salter, Shortus, Tracy                                                     |
| <b>Approaches of COMMUNICATION</b> | Acknowledging   | Acknowledging Patient's Role, Effort                                | Ford'03, Grub, Hart, Lown, McLeod, Murdoch, Visser, Zulman                                                   |
|                                    |                 | Celebrating Successes                                               | McLeod, Zulman                                                                                               |
|                                    |                 | Legitimizing Personal Preferences, Validating the Patient           | Landmark, Lown, McLeod, Murdoch, Pieterse, Salter, Tracy, Zulman                                             |
|                                    |                 | Reassurances                                                        | Ford'03, Kennedy, Landmark, McLeod, Pieterse, Salter, Tracy, Van Humbeeck, Visser, Zulman                    |
|                                    |                 | Showing Own Emotions                                                | Hall, Landmark, Lown, McLeod, Visser, Zulman                                                                 |
|                                    |                 | Showing Understanding                                               | Chhabra, Davis, Elwyn, Fore'03, Grub, Jefford, Kennedy, Landmark, Lown, McLeod, Murdoch                      |
|                                    |                 | Valuing, Acknowledging, Validating, Responding to Patient Emotions  | Aita, Chhabra, Feiring, Ford'02, Ford'03, Grub, Hall, Jefford, Landmark, Lown, McLeod, Paiva, Visser, Zulman |
|                                    | Clarifying      | Checking, Rechecking                                                | Elwyn, Ford'03, Ford'06, Landmark, Murdoch, Paiva, Pieterse                                                  |
|                                    |                 | Clarifying Values, Preferences, Views                               | Elwyn, Ford'03, Friedberg, Landmark, Lown, Murdoch, Pieterse, Vermont                                        |
|                                    |                 | Framing & Reframing                                                 | Elwyn, Golden, Landmark, McLeod, Murdoch, Vermont, Zulman                                                    |
|                                    |                 | Repeating                                                           | Paiva, Pieterse                                                                                              |
|                                    |                 | Revisiting (Decisions Over Time)                                    | McLeod, Shortus                                                                                              |
|                                    | Encouraging     | Approving/Amplifying Patient Appraisals/Choices                     | Pieterse                                                                                                     |
|                                    |                 | Encouraging/Inviting Patient Comments/Questions                     | Chhabra, Fore'd'03, Jefford, Hisham, Landmark, McLeod, Murdoch, Pieterse, Salter                             |
|                                    |                 | Encouraging Patient to Prepare                                      | Murdoch, Salter                                                                                              |
|                                    |                 | Encouraging Storytelling                                            | McLeod                                                                                                       |
|                                    |                 | Inviting Patient Participation                                      | Chhabra, McLeod, Pieterse, Salter                                                                            |
|                                    |                 | Motivational Interviewing                                           | McLeod, Paiva, Zulman                                                                                        |

Tringale, Michael et al, bmjopen-2022-067268

| Primary Themes | Subthemes                                               |                          | Healthcare Professional Approaches/Behaviors      | Citation(s)                                                                          |                                                                                                                                                                                                                                              |
|----------------|---------------------------------------------------------|--------------------------|---------------------------------------------------|--------------------------------------------------------------------------------------|----------------------------------------------------------------------------------------------------------------------------------------------------------------------------------------------------------------------------------------------|
|                | Exchanging Information                                  | Defining                 | Explain, Define, Describe the Problem for Patient | Elwyn, Ford'03, Kennedy, Vermunt                                                     |                                                                                                                                                                                                                                              |
|                |                                                         |                          | Inform Patient of Condition/Diagnosis/Biomedical  | Aita, Ford'03, Grub, McLeod, Murdoch, Salter, Schulman-Green, Shortus                |                                                                                                                                                                                                                                              |
|                |                                                         | Educating                |                                                   | Coaching                                                                             | Jeffords, Zulman                                                                                                                                                                                                                             |
|                |                                                         |                          |                                                   | Information Giving                                                                   | Golden, Grub, Jefford, McLeod, Paiva, Van Humbeek, Visser                                                                                                                                                                                    |
|                |                                                         |                          |                                                   | Information/Education Aids, Materials, Tools                                         | Davis, Golden, Jefford, McLeod, Zulman                                                                                                                                                                                                       |
|                |                                                         |                          |                                                   | Patient Education                                                                    | Chhabra, Davis, Feiring, Friedberg, Vermunt                                                                                                                                                                                                  |
|                |                                                         |                          |                                                   | Sharing Knowledge with the Patient                                                   | Ford'03, Golden, McLeod, Paiva                                                                                                                                                                                                               |
|                |                                                         | Interviewing & Eliciting |                                                   | Eliciting Goals                                                                      | Aita, Chhabra, Grub, Lown, McLeod, Murdoch, Salter, Schulman-Green, Shortus, Vermunt, Zulman                                                                                                                                                 |
|                |                                                         |                          |                                                   | Eliciting Patient Appraisals (Strengths of Preferences)                              | Pieterse                                                                                                                                                                                                                                     |
|                |                                                         |                          |                                                   | Eliciting Preferences                                                                | Chhabra, Davis, Elwyn, Ford'02, Ford'03, Ford'06, Friedberg, Golden, Grub, Hart, Hisham, Jefford, Kennedy, Landmark, Lown, McLeod, Murdoch, Pieterse, Salter, Schulman-Green, Shepherd, Shortus, Tracy, Van Humbeek, Vermunt, Visser, Zulman |
|                |                                                         |                          |                                                   | Eliciting Values                                                                     | Aita, Chhabra, Davis, Elwyn, Ford'02, Ford'03, Friedberg, Golden, Grub, Hart, Hall, Hisham, Kennedy, Landmark, Lown, McLeod, Murdoch, Schulman-Green, Tracy, Van Humbeek, Vermunt                                                            |
|                |                                                         |                          |                                                   | Eliciting Circumstances                                                              | Aita, Salter, Schulman-Green, Tracy, Zulman                                                                                                                                                                                                  |
|                |                                                         |                          |                                                   | Eliciting Patient Feelings                                                           | Feiring, Golden, Hall, Landmark, Lown, McLeod, Pieterse, Visser                                                                                                                                                                              |
|                |                                                         |                          |                                                   | Patient-Centered Interviewing                                                        | Aita, Paiva, Vermunt, Zulman                                                                                                                                                                                                                 |
|                |                                                         | Presenting Evidence      |                                                   | Discussing Risks/Benefits/Side-Effects/Trade-Offs                                    | Chhabra, Elwyn, Ford'02, Ford'03, Friedberg, Golden, Jefford, Lown, McLeod, Paiva, Pieterse, Shepherd, Vermunt                                                                                                                               |
|                |                                                         |                          |                                                   | Presenting, Sharing, Explaining Evidence                                             | Ford'03, Friedberg, Grub, McLeod, Pieterse, Tracy, Vermunt                                                                                                                                                                                   |
|                |                                                         |                          |                                                   | Willingness to See More Information, Encourages Patient to Look for More Information | Ford'03, Jefford, Lown, Visser                                                                                                                                                                                                               |
|                |                                                         | Exploring                |                                                   | Asking Questions                                                                     | Chhabra, Ford'02, Ford'03, Jefford, McLeod                                                                                                                                                                                                   |
|                | Assessing Values, Preferences, Expectations             |                          |                                                   | Ford'03, Grub, Landmark, Shepherd                                                    |                                                                                                                                                                                                                                              |
|                | Explore Ideas, Perspective, Alternatives                |                          |                                                   | Elwyn, Landmark, Shepherd, Visser                                                    |                                                                                                                                                                                                                                              |
|                | Explore Cues and Clues (Verbal and Non-Verbal)          |                          |                                                   | Chhabra, Elwyn, Ford'03, Hall, Kennedy, McLeod, Salter, Visser, Zulman               |                                                                                                                                                                                                                                              |
|                | Explore Fears, Concerns, Distresses, Emotions           |                          |                                                   | Elwyn, Ford'02, Ford'03, Ford'06, Golden, Lown, Salter, Visser, Zulman               |                                                                                                                                                                                                                                              |
|                | Signaling (Pausing, Thinking Out Loud, Non-Verbal Cues) |                          |                                                   | Chhabra, Elwyn, Jefford, Hall, McLeod, Murdoch, Pieterse, Visser, Zulman             |                                                                                                                                                                                                                                              |
|                | Language                                                |                          | Deferential Language                              | Chhabra                                                                              |                                                                                                                                                                                                                                              |
|                |                                                         |                          | Directive Language                                | Ford'02                                                                              |                                                                                                                                                                                                                                              |

Tringale, Michael et al, bmjopen-2022-067268

| Primary Themes                  | Subthemes               | Healthcare Professional Approaches/Behaviors                      | Citation(s)                                                                                                       |
|---------------------------------|-------------------------|-------------------------------------------------------------------|-------------------------------------------------------------------------------------------------------------------|
|                                 |                         | Emotion-Oriented Speech                                           | Visser                                                                                                            |
|                                 |                         | Use Common Language, No Jargon                                    | Lown, Paiva, Pieterse                                                                                             |
|                                 |                         | Using Inviting Language                                           | Chhabra                                                                                                           |
|                                 |                         | Variations in Tone of Voice                                       | Hall, McLeod, Visser, Zulman                                                                                      |
|                                 | Listening               | Active Listening, Without Interruption                            | Elwyn, Ford'03, Ford'06, Hall, Landmark, Lown, McLeod, Paiva, Salter, Zulman                                      |
|                                 |                         | Silence, Attentive or As a Response to Emotion                    | Visser, Zulman                                                                                                    |
|                                 | Summarizing             | Highlight/Repeat Patient's Appraisal/Choice                       | Pieterse                                                                                                          |
|                                 |                         | Providing Summaries to the Patient (Written or Audio)             | Hart, Jefford                                                                                                     |
|                                 |                         | Summarizing in the Encounter                                      | Landmark                                                                                                          |
| <b>Approaches of CONGRUENCE</b> | Adjusting & Tailoring   | Adjust Approach Based on Patient's Needs, Values, Preferences     | Ford'03, Hall, Jefford, Lown, Paiva, Visser, Zulman                                                               |
|                                 |                         | Tailor Options for the Patient                                    | Elwyn, Feiring, Ford'03, Friedberg, Golden, Hart, McLeod, Paiva, Pieterse, Shepherd, Shortus, Van Humbeek, Zulman |
|                                 | Balancing & Flexibility | Flexibility In Overall Approach to Care                           | Aita, Elwyn, Ford'02, Ford'03, Ford'06, McLeod, Shortus, Tracy, Van Humbeek, Vermunt, Visser                      |
|                                 |                         | Balancing Information, Issues, Needs, Power, and Responsibilities | Ford'03, Friedberg, Golden, Grub, Hisham, Jefford, Lown, McLeod, Paiva, Pieterse, Salter, Shortus                 |
